# Supplementary material for: Multi-omics integration identifies the common genetic basis for congenital heart disease and autism spectrum disorder
Source: Research Square preprint supplement (doi:10.21203/rs.3.rs-8108414/v1), 2025-12-02
Supplement: Supplementary file 2 [file d662e39f408b47f501f7145a.xlsx]

## Sheet: Supplemental Table 1
Supplemental Table 1. Scores and Prioritization of the 73 Genes in the CHD&ASD GeneSet
Symbol	Description	Ensembl ID	Congenital Heart Disease				Autism Spectrum Disorder
			DisName	Score	Evidence	PubMed ID	Genetic Category	Gene Score	Syndromic	Eagle Score	Number of reports
ACE	Angiotensin I Converting Enzyme	ENSG00000159640	Patent Ductus Arteriosus 1	5.52	DISEASES inferred 14		Rare Single Gene Mutation, Genetic Association	2			5		* Score: These gene-disease association scores are computed as weighted sums of individual scores derived from the following 8 sources of information: OMIM, ClinVar, Orphanet, SwissProt/Humsavar, GeneTests, DISEASES, Novoseek and GeneCards. The score values depend on the level of manual curation of the information source, as well as on the significance assigned by the source itself to its differe…
ACE	Angiotensin I Converting Enzyme	ENSG00000159640	Patent Foramen Ovale	5.56	DISEASES inferred 14		Rare Single Gene Mutation, Genetic Association	2			5
ACE	Angiotensin I Converting Enzyme	ENSG00000159640	Aortic Valve Disease 1	11.88	DISEASES inferred 14 14		Rare Single Gene Mutation, Genetic Association	2			5
ACE	Angiotensin I Converting Enzyme	ENSG00000159640	Mitral Valve Insufficiency	8.2	DISEASES inferred 14		Rare Single Gene Mutation, Genetic Association	2			5
ARNT2	Aryl Hydrocarbon Receptor Nuclear Translocator 2	ENSG00000172379	Atrial Septal Defect 6	4.95	DISEASES inferred 14		Rare Single Gene Mutation, Syndromic, Genetic Association, Functional	2			15
BRAF	B-Raf Proto-Oncogene, Serine/Threonine Kinase	ENSG00000157764	Pulmonic Stenosis	32.87	Likely pathogenic 5 GeneCards inferred via : Disorders (show sections)		Rare Single Gene Mutation, Syndromic	1	SYNDROMIC		18
BRAF	B-Raf Proto-Oncogene, Serine/Threonine Kinase	ENSG00000157764	Ventricular Septal Defect	25	Likely pathogenic 5		Rare Single Gene Mutation, Syndromic	1	SYNDROMIC		18
C15orf62	Chromosome 15 Open Reading Frame 62	ENSG00000188277	Atrial Septal Defect 5	6.1	DISEASES inferred 14		Rare Single Gene Mutation	2			3
CACNA1D	Calcium Voltage-Gated Channel Subunit Alpha1 D	ENSG00000157388	Heart Block, Congenital	5.63	DISEASES inferred 14		Rare Single Gene Mutation, Syndromic, Genetic Association, Functional	2		12.7	31
CDH2	Cadherin 2	ENSG00000170558	Hypoplastic Left Heart Syndrome	12	DISEASES inferred 14 GeneCards inferred via : Publications (show sections)		Rare Single Gene Mutation, Syndromic	3	SYNDROMIC		8
CDK8	Cyclin Dependent Kinase 8	ENSG00000132964	Ebstein Anomaly	400	Pathogenic 5		Rare Single Gene Mutation, Syndromic		SYNDROMIC		5
CDK8	Cyclin Dependent Kinase 8	ENSG00000132964	Ebstein Malformation of the Tricuspid Valve	400	Pathogenic 5		Rare Single Gene Mutation, Syndromic		SYNDROMIC		5
CHD7	Chromodomain Helicase DNA Binding Protein 7	ENSG00000171316	Interatrial Communication	25	Likely pathogenic 5		Rare Single Gene Mutation, Syndromic, Functional	1	SYNDROMIC	8.1	46
CHD7	Chromodomain Helicase DNA Binding Protein 7	ENSG00000171316	Atrioventricular Septal Defect	6.15	DISEASES inferred 14		Rare Single Gene Mutation, Syndromic, Functional	1	SYNDROMIC	8.1	46
CHD7	Chromodomain Helicase DNA Binding Protein 7	ENSG00000171316	Double Outlet Right Ventricle	5.59	DISEASES inferred 14		Rare Single Gene Mutation, Syndromic, Functional	1	SYNDROMIC	8.1	46		* Gene Score: Category 1: Each of these genes has been clearly implicated in ASD—typically by the presence of at least three de novo likely-gene-disrupting mutations being reported in the literature—and such mutations identified in the sequencing of the SPARK cohort are typically returned to the participants. Some of these gene meet the most rigorous threshold of genome-wide significance; all at …
CHD7	Chromodomain Helicase DNA Binding Protein 7	ENSG00000171316	Patent Ductus Arteriosus 1	5.88	DISEASES inferred 14		Rare Single Gene Mutation, Syndromic, Functional	1	SYNDROMIC	8.1	46
CHD7	Chromodomain Helicase DNA Binding Protein 7	ENSG00000171316	Atrial Heart Septal Defect	31.06	Likely pathogenic 5 DISEASES inferred 14		Rare Single Gene Mutation, Syndromic, Functional	1	SYNDROMIC	8.1	46
CHD7	Chromodomain Helicase DNA Binding Protein 7	ENSG00000171316	Heart Septal Defect	6.69	DISEASES inferred 14		Rare Single Gene Mutation, Syndromic, Functional	1	SYNDROMIC	8.1	46
CLIP2	CAP-Gly Domain Containing Linker Protein 2	ENSG00000106665	Supravalvular Aortic Stenosis	6.62	DISEASES inferred 14		Genetic Association	3			1
CNTN5	Contactin 5	ENSG00000149972	Atrial Septal Defect 6	4.94	DISEASES inferred 14		Rare Single Gene Mutation, Genetic Association	2			11
CNTN6	Contactin 6	ENSG00000134115	Atrial Septal Defect 6	4.84	DISEASES inferred 14		Rare Single Gene Mutation, Genetic Association	2		13.8	17
CREBBP	CREB Binding Protein	ENSG00000005339	Interatrial Communication	25	Likely pathogenic 5		Rare Single Gene Mutation, Syndromic, Genetic Association	1	SYNDROMIC	31.35	41
CREBBP	CREB Binding Protein	ENSG00000005339	Atrial Heart Septal Defect	29.29	Likely pathogenic 5 DISEASES inferred 14		Rare Single Gene Mutation, Syndromic, Genetic Association	1	SYNDROMIC	31.35	41
CTNNA3	Catenin Alpha 3	ENSG00000183230	Arrhythmogenic Right Ventricular Dysplasia, Familial, 1	5.64	DISEASES inferred 14		Rare Single Gene Mutation, Genetic Association	2			19
CYFIP1	Cytoplasmic FMR1 Interacting Protein 1	ENSG00000273749	Atrial Septal Defect 1	4.75	DISEASES inferred 14		Rare Single Gene Mutation, Genetic Association, Functional	2			23
DLL1	Delta Like Canonical Notch Ligand 1	ENSG00000198719	Aortic Valve Disease 1	11.59	DISEASES inferred 14 14 14		Rare Single Gene Mutation, Syndromic	2	SYNDROMIC		6
DMD	Dystrophin	ENSG00000198947	Atrial Heart Septal Defect	404.22	Pathogenic 5 DISEASES inferred 14		Rare Single Gene Mutation, Syndromic, Genetic Association		SYNDROMIC		46
DMD	Dystrophin	ENSG00000198947	Interatrial Communication	400	Pathogenic 5		Rare Single Gene Mutation, Syndromic, Genetic Association		SYNDROMIC		46
DSCAM	DS Cell Adhesion Molecule	ENSG00000171587	Atrioventricular Septal Defect	6.04	DISEASES inferred 14		Rare Single Gene Mutation, Genetic Association, Functional	1		13.5	18
EHMT1	Euchromatic Histone Lysine Methyltransferase 1	ENSG00000181090	Hypoplastic Left Heart Syndrome	11.94	DISEASES inferred 14 GeneCards inferred via : Publications (show sections)		Rare Single Gene Mutation, Syndromic, Functional	1	SYNDROMIC	13.5	42
ERMN	Ermin	ENSG00000136541	Atrial Septal Defect 5	5.67	DISEASES inferred 14		Rare Single Gene Mutation	2			1
FBN1	Fibrillin 1	ENSG00000166147	Aortic Valve Disease 1	22.08	DISEASES inferred 14 14 14 Novoseek inferred 53	17785109 14502156	Rare Single Gene Mutation, Syndromic	2			15
FBN1	Fibrillin 1	ENSG00000166147	Supravalvular Aortic Stenosis	14.33	DISEASES inferred 14 Novoseek inferred 53	10533027 7911041 16893474	Rare Single Gene Mutation, Syndromic	2			15
FBN1	Fibrillin 1	ENSG00000166147	Tetralogy of Fallot	13.68	DISEASES inferred 14 GeneCards inferred via : Publications (show sections)		Rare Single Gene Mutation, Syndromic	2			15
FBN1	Fibrillin 1	ENSG00000166147	Patent Ductus Arteriosus 1	6.16	DISEASES inferred 14		Rare Single Gene Mutation, Syndromic	2			15
FBN1	Fibrillin 1	ENSG00000166147	Mitral Valve Insufficiency	36.1	Likely pathogenic 5 DISEASES inferred 14 Novoseek inferred 53	10441700 19996017	Rare Single Gene Mutation, Syndromic	2			15
FGF14	Fibroblast Growth Factor 14	ENSG00000102466	Patent Foramen Ovale	25	Likely pathogenic 5		Rare Single Gene Mutation	3			2
FLNA	Filamin A	ENSG00000196924	Cardiac Valvular Dysplasia, X-Linked	1680.8	Molecular basis known 57 Pathogenic 5 Causative germline mutation (loss of function) 58 Causative variation 73 Genetic Tests 28 Likely pathogenic 5 DISEASES inferred 14	240645 8230166 9497244 (more) 17190868 27739212 1854572 26633545 29237676	Rare Single Gene Mutation, Syndromic, Functional	3			11
FLNA	Filamin A	ENSG00000196924	Aortic Valve Disease 1	13.04	DISEASES inferred 14 14 14		Rare Single Gene Mutation, Syndromic, Functional	3			11
FLNA	Filamin A	ENSG00000196924	Patent Foramen Ovale	403.18	Pathogenic 5 DISEASES inferred 14		Rare Single Gene Mutation, Syndromic, Functional	3			11
FLNA	Filamin A	ENSG00000196924	Patent Ductus Arteriosus 1	431.04	Pathogenic 5 Likely pathogenic 5 DISEASES inferred 14		Rare Single Gene Mutation, Syndromic, Functional	3			11
FLNA	Filamin A	ENSG00000196924	Ebstein Anomaly	13.23	DISEASES inferred 14 GeneCards inferred via : Publications (show sections)		Rare Single Gene Mutation, Syndromic, Functional	3			11
FOXP1	Forkhead Box P1	ENSG00000114861	Atrial Septal Defect 1	400	Pathogenic 5		Rare Single Gene Mutation, Syndromic, Genetic Association, Functional	1	SYNDROMIC	60.45	72
GTF2I	General Transcription Factor IIi	ENSG00000263001	Supravalvular Aortic Stenosis	16.89	DISEASES inferred 14 Novoseek inferred 53	19568270	Rare Single Gene Mutation, Syndromic, Genetic Association, Functional	2			11
HDAC8	Histone Deacetylase 8	ENSG00000147099	Atrial Heart Septal Defect	29.28	Likely pathogenic 5 DISEASES inferred 14		Rare Single Gene Mutation, Syndromic		SYNDROMIC	3.7	12
HDAC8	Histone Deacetylase 8	ENSG00000147099	Interatrial Communication	25	Likely pathogenic 5		Rare Single Gene Mutation, Syndromic		SYNDROMIC	3.7	12
HRAS	HRas Proto-Oncogene, GTPase	ENSG00000174775	Pulmonic Stenosis	7.53	GeneCards inferred via : Disorders (show sections)		Rare Single Gene Mutation, Syndromic, Genetic Association	1			12
HYDIN	HYDIN Axonemal Central Pair Apparatus Protein	ENSG00000157423	Patent Ductus Arteriosus 1	28.35	Likely pathogenic 5 DISEASES inferred 14		Rare Single Gene Mutation, Genetic Association	2			5
IGF1	Insulin Like Growth Factor 1	ENSG00000017427	Atrial Septal Defect 8	3.06	DISEASES inferred 14		Rare Single Gene Mutation, Functional	3			8
IQSEC2	IQ Motif And Sec7 Domain ArfGEF 2	ENSG00000124313	Atrial Septal Defect 8	5.12	DISEASES inferred 14		Rare Single Gene Mutation, Syndromic, Functional	1	SYNDROMIC		51
ITGA8	Integrin Subunit Alpha 8	ENSG00000077943	Arrhythmogenic Right Ventricular Dysplasia, Familial, 1	4.97	DISEASES inferred 14		Rare Single Gene Mutation	3			7
JARID2	Jumonji And AT-Rich Interaction Domain Containing 2	ENSG00000008083	Double Outlet Right Ventricle	5.36	DISEASES inferred 14		Rare Single Gene Mutation, Syndromic, Genetic Association	2			18
LAMB1	Laminin Subunit Beta 1	ENSG00000091136	Supravalvular Aortic Stenosis	7.46	GeneCards inferred via : Publications (show sections)		Rare Single Gene Mutation, Genetic Association	2			11
LEP	Leptin	ENSG00000174697	Hypoplastic Left Heart Syndrome	11.42	DISEASES inferred 14 GeneCards inferred via : Publications (show sections)		Rare Single Gene Mutation	2			1
LRP2	LDL Receptor Related Protein 2	ENSG00000081479	Hypoplastic Left Heart Syndrome	8.12	GeneCards inferred via : Publications (show sections)		Rare Single Gene Mutation, Syndromic, Genetic Association	2			20
MECP2	Methyl-CpG Binding Protein 2	ENSG00000169057	Atrial Septal Defect 8	3.29	DISEASES inferred 14		Rare Single Gene Mutation, Syndromic, Functional	1	SYNDROMIC	106.65	130
MED13L	Mediator Complex Subunit 13L	ENSG00000123066	Atrial Septal Defect 2	4.47	DISEASES inferred 14		Rare Single Gene Mutation, Syndromic	1	SYNDROMIC	35	54
MED13L	Mediator Complex Subunit 13L	ENSG00000123066	Atrial Septal Defect 5	5.42	DISEASES inferred 14		Rare Single Gene Mutation, Syndromic	1	SYNDROMIC	35	54
MED13L	Mediator Complex Subunit 13L	ENSG00000123066	Isolated Congenitally Uncorrected Transposition of the Great Arteries	25	Susceptibility factor 58		Rare Single Gene Mutation, Syndromic	1	SYNDROMIC	35	54
MED13L	Mediator Complex Subunit 13L	ENSG00000123066	Transposition of the Great Arteries, Dextro-Looped	431.77	Pathogenic 5 Likely pathogenic 5 DISEASES inferred 14	23403903 24781760 25712080 (more) 25758992 27824329 28554332 29511999 29959045 31785789 16199547 24896178 28645799	Rare Single Gene Mutation, Syndromic	1	SYNDROMIC	35	54
MEF2C	Myocyte Enhancer Factor 2C	ENSG00000081189	Atrioventricular Septal Defect	6.26	DISEASES inferred 14		Rare Single Gene Mutation, Syndromic, Genetic Association, Functional	1	SYNDROMIC	9.85	53
MEF2C	Myocyte Enhancer Factor 2C	ENSG00000081189	Double Outlet Right Ventricle	6.56	DISEASES inferred 14		Rare Single Gene Mutation, Syndromic, Genetic Association, Functional	1	SYNDROMIC	9.85	53
MEF2C	Myocyte Enhancer Factor 2C	ENSG00000081189	Tricuspid Atresia	5.1	DISEASES inferred 14		Rare Single Gene Mutation, Syndromic, Genetic Association, Functional	1	SYNDROMIC	9.85	53
MEF2C	Myocyte Enhancer Factor 2C	ENSG00000081189	Ventricular Septal Defect	7.07	DISEASES inferred 14		Rare Single Gene Mutation, Syndromic, Genetic Association, Functional	1	SYNDROMIC	9.85	53
MEF2C	Myocyte Enhancer Factor 2C	ENSG00000081189	Heart Septal Defect	7.13	DISEASES inferred 14		Rare Single Gene Mutation, Syndromic, Genetic Association, Functional	1	SYNDROMIC	9.85	53
MEF2C	Myocyte Enhancer Factor 2C	ENSG00000081189	Complete Atrioventricular Septal Defect Without Ventricular Hypoplasia	25	Susceptibility factor 58	35719119	Rare Single Gene Mutation, Syndromic, Genetic Association, Functional	1	SYNDROMIC	9.85	53
MIB1	MIB E3 Ubiquitin Protein Ligase 1	ENSG00000101752	Hypoplastic Left Heart Syndrome	11.17	DISEASES inferred 14 GeneCards inferred via : Publications (show sections)		Rare Single Gene Mutation	2		3.6	10
MSL2	MSL Complex Subunit 2	ENSG00000174579	Atrial Septal Defect 3	5.69	DISEASES inferred 14		Rare Single Gene Mutation	3			5
MSL3	MSL Complex Subunit 3	ENSG00000005302	Atrial Septal Defect 3	5.89	DISEASES inferred 14		Rare Single Gene Mutation, Syndromic	1	SYNDROMIC		6
MSX2	Msh Homeobox 2	ENSG00000120149	Double Outlet Right Ventricle	5.36	DISEASES inferred 14		Rare Single Gene Mutation, Syndromic	3	SYNDROMIC		2
MTF1	Metal Regulatory Transcription Factor 1	ENSG00000188786	Atrial Septal Defect 2	4.58	DISEASES inferred 14		Rare Single Gene Mutation, Syndromic, Genetic Association	2			6
MTHFR	Methylenetetrahydrofolate Reductase	ENSG00000177000	Patent Foramen Ovale	6.41	DISEASES inferred 14		Rare Single Gene Mutation, Syndromic, Genetic Association, Functional	2			24
MTHFR	Methylenetetrahydrofolate Reductase	ENSG00000177000	Tetralogy of Fallot	13.54	DISEASES inferred 14 GeneCards inferred via : Publications (show sections)		Rare Single Gene Mutation, Syndromic, Genetic Association, Functional	2			24
MTHFR	Methylenetetrahydrofolate Reductase	ENSG00000177000	Atrial Heart Septal Defect	6.24	DISEASES inferred 14		Rare Single Gene Mutation, Syndromic, Genetic Association, Functional	2			24
MYLK	Myosin Light Chain Kinase	ENSG00000065534	Aortic Valve Disease 1	11.05	DISEASES inferred 14 14 14		Rare Single Gene Mutation	3			4
MYOCD	Myocardin	ENSG00000141052	Patent Ductus Arteriosus 1	5.4	DISEASES inferred 14		Rare Single Gene Mutation	3			3
NBEA	Neurobeachin	ENSG00000172915	Atrial Septal Defect 1	5.22	DISEASES inferred 14		Rare Single Gene Mutation, Syndromic, Functional	1	SYNDROMIC		26
NF1	Neurofibromin 1	ENSG00000196712	Pulmonic Stenosis	16.47	GeneCards inferred via : Disorders Publications (show sections)		Rare Single Gene Mutation, Syndromic, Genetic Association, Functional	1	SYNDROMIC	9.3	39
NF1	Neurofibromin 1	ENSG00000196712	Atypical Coarctation of Aorta	25	Likely pathogenic 5	29483232	Rare Single Gene Mutation, Syndromic, Genetic Association, Functional	1	SYNDROMIC	9.3	39
NIPBL	NIPBL Cohesin Loading Factor	ENSG00000164190	Tetralogy of Fallot	405.13	Pathogenic 5 DISEASES inferred 14		Rare Single Gene Mutation, Syndromic	1	SYNDROMIC	15.3	19
NIPBL	NIPBL Cohesin Loading Factor	ENSG00000164190	Atrioventricular Septal Defect	12.73	DISEASES inferred 14 GeneCards inferred via : Publications (show sections)		Rare Single Gene Mutation, Syndromic	1	SYNDROMIC	15.3	19
NOTCH1	Notch Receptor 1	ENSG00000148400	Double Outlet Right Ventricle	5.73	DISEASES inferred 14		Rare Single Gene Mutation, Functional	2			10
NOTCH1	Notch Receptor 1	ENSG00000148400	Tetralogy of Fallot	415.05	Pathogenic 5 DISEASES inferred 14 GeneCards inferred via : Publications (show sections)	27760138 19597493	Rare Single Gene Mutation, Functional	2			10
NOTCH1	Notch Receptor 1	ENSG00000148400	Aortic Valve Disease 1	1412.64	Molecular basis known 57 Pathogenic 5 Causative germline mutation 58 Genetic Tests 28 Likely pathogenic 5 DISEASES inferred 14 14 14 Novoseek inferred 53 GeneCards inferred via : Disorders (show sections)	16025100 16729972 27760138 (more) 18593716 26820064 16601454 17662764	Rare Single Gene Mutation, Functional	2			10
NOTCH1	Notch Receptor 1	ENSG00000148400	Patent Ductus Arteriosus 1	5.47	DISEASES inferred 14		Rare Single Gene Mutation, Functional	2			10
NOTCH1	Notch Receptor 1	ENSG00000148400	Hypoplastic Left Heart Syndrome	50.48	Likely pathogenic 5 DISEASES inferred 14 GeneCards inferred via : Disorders Publications (show sections)	30511478	Rare Single Gene Mutation, Functional	2			10
NOTCH1	Notch Receptor 1	ENSG00000148400	Heart Septal Defect	6.69	DISEASES inferred 14		Rare Single Gene Mutation, Functional	2			10
NOTCH1	Notch Receptor 1	ENSG00000148400	Atrioventricular Septal Defect	5.74	DISEASES inferred 14		Rare Single Gene Mutation, Functional	2			10
NR2F1	Nuclear Receptor Subfamily 2 Group F Member 1	ENSG00000175745	Atrioventricular Septal Defect	6.13	DISEASES inferred 14		Rare Single Gene Mutation, Syndromic, Genetic Association, Functional	2	SYNDROMIC		27
NR3C2	Nuclear Receptor Subfamily 3 Group C Member 2	ENSG00000151623	Mitral Valve Insufficiency	7.3	DISEASES inferred 14		Rare Single Gene Mutation, Syndromic	1	SYNDROMIC		12
NSD1	Nuclear Receptor Binding SET Domain Protein 1	ENSG00000165671	Patent Foramen Ovale	403.76	Pathogenic 5 DISEASES inferred 14		Rare Single Gene Mutation, Syndromic, Functional	1	SYNDROMIC	22.9	34
NSD2	Nuclear Receptor Binding SET Domain Protein 2	ENSG00000109685	Ventricular Septal Defect	404.77	Pathogenic 5 DISEASES inferred 14		Rare Single Gene Mutation, Syndromic, Functional	2	SYNDROMIC		13
PCDHA9	Protocadherin Alpha 9	ENSG00000204961	Hypoplastic Left Heart Syndrome	7.65	DISEASES inferred 14		Rare Single Gene Mutation, Genetic Association	2			4
POGZ	Pogo Transposable Element Derived With ZNF Domain	ENSG00000143442	Atrial Septal Defect 5	4.62	DISEASES inferred 14		Rare Single Gene Mutation, Syndromic, Functional	1	SYNDROMIC	35.4	61
PRODH	Proline Dehydrogenase 1	ENSG00000100033	Atrial Heart Septal Defect	7.71	DISEASES inferred 14 14		Rare Single Gene Mutation, Syndromic, Genetic Association	2	SYNDROMIC		8
PRODH	Proline Dehydrogenase 1	ENSG00000100033	Atrioventricular Septal Defect	6.88	DISEASES inferred 14 14		Rare Single Gene Mutation, Syndromic, Genetic Association	2	SYNDROMIC		8
PRODH	Proline Dehydrogenase 1	ENSG00000100033	Patent Ductus Arteriosus 1	8.54	DISEASES inferred 14 14		Rare Single Gene Mutation, Syndromic, Genetic Association	2	SYNDROMIC		8
PRODH	Proline Dehydrogenase 1	ENSG00000100033	Atrial Septal Defect 9	6.94	DISEASES inferred 14 14		Rare Single Gene Mutation, Syndromic, Genetic Association	2	SYNDROMIC		8
PRODH	Proline Dehydrogenase 1	ENSG00000100033	Ventricular Septal Defect	8.57	DISEASES inferred 14 14		Rare Single Gene Mutation, Syndromic, Genetic Association	2	SYNDROMIC		8
PRODH	Proline Dehydrogenase 1	ENSG00000100033	Tricuspid Atresia	6.94	DISEASES inferred 14 14		Rare Single Gene Mutation, Syndromic, Genetic Association	2	SYNDROMIC		8
PRODH	Proline Dehydrogenase 1	ENSG00000100033	Supravalvular Aortic Stenosis	5.92	DISEASES inferred 14 14		Rare Single Gene Mutation, Syndromic, Genetic Association	2	SYNDROMIC		8
PRODH	Proline Dehydrogenase 1	ENSG00000100033	Heart Septal Defect	8.73	DISEASES inferred 14 14		Rare Single Gene Mutation, Syndromic, Genetic Association	2	SYNDROMIC		8
PTPN11	Protein Tyrosine Phosphatase Non-Receptor Type 11	ENSG00000179295	Patent Foramen Ovale	403.98	Pathogenic 5 DISEASES inferred 14	29555671	Rare Single Gene Mutation, Syndromic, Functional	1	SYNDROMIC		27
PTPN11	Protein Tyrosine Phosphatase Non-Receptor Type 11	ENSG00000179295	Atrioventricular Septal Defect	5.67	DISEASES inferred 14		Rare Single Gene Mutation, Syndromic, Functional	1	SYNDROMIC		27
PTPN11	Protein Tyrosine Phosphatase Non-Receptor Type 11	ENSG00000179295	Patent Ductus Arteriosus 1	405.41	Pathogenic 5 DISEASES inferred 14	29555671	Rare Single Gene Mutation, Syndromic, Functional	1	SYNDROMIC		27
PTPN11	Protein Tyrosine Phosphatase Non-Receptor Type 11	ENSG00000179295	Atrial Septal Defect 2	400	Pathogenic 5	29555671	Rare Single Gene Mutation, Syndromic, Functional	1	SYNDROMIC		27
PTPN11	Protein Tyrosine Phosphatase Non-Receptor Type 11	ENSG00000179295	Heart Septal Defect	6.61	DISEASES inferred 14		Rare Single Gene Mutation, Syndromic, Functional	1	SYNDROMIC		27
PTPN11	Protein Tyrosine Phosphatase Non-Receptor Type 11	ENSG00000179295	Atrial Heart Septal Defect	6.4	DISEASES inferred 14		Rare Single Gene Mutation, Syndromic, Functional	1	SYNDROMIC		27
PTPN11	Protein Tyrosine Phosphatase Non-Receptor Type 11	ENSG00000179295	Tetralogy of Fallot	13.65	DISEASES inferred 14 GeneCards inferred via : Publications (show sections)		Rare Single Gene Mutation, Syndromic, Functional	1	SYNDROMIC		27
PTPN11	Protein Tyrosine Phosphatase Non-Receptor Type 11	ENSG00000179295	Pulmonic Stenosis	7.53	GeneCards inferred via : Disorders (show sections)		Rare Single Gene Mutation, Syndromic, Functional	1	SYNDROMIC		27
PTPRB	Protein Tyrosine Phosphatase Receptor Type B	ENSG00000127329	Hypoplastic Left Heart Syndrome	8.12	GeneCards inferred via : Publications (show sections)		Rare Single Gene Mutation, Genetic Association	2			6
RAD21	RAD21 Cohesin Complex Component	ENSG00000164754	Ventricular Septal Defect	11.67	DISEASES inferred 14 GeneCards inferred via : Disorders (show sections)		Rare Single Gene Mutation, Syndromic		SYNDROMIC		7
RPS6KA3	Ribosomal Protein S6 Kinase A3	ENSG00000177189	Ventricular Septal Defect	28.21	Likely pathogenic 5 DISEASES inferred 14		Rare Single Gene Mutation, Syndromic	2	SYNDROMIC		19
SETBP1	SET Binding Protein 1	ENSG00000152217	Interatrial Communication	25	Likely pathogenic 5		Rare Single Gene Mutation, Syndromic, Functional	1			32
SETBP1	SET Binding Protein 1	ENSG00000152217	Atrial Heart Septal Defect	28.98	Likely pathogenic 5 DISEASES inferred 14		Rare Single Gene Mutation, Syndromic, Functional	1			32
SHANK1	SH3 And Multiple Ankyrin Repeat Domains 1	ENSG00000161681	Atrial Septal Defect 2	4.6	DISEASES inferred 14		Rare Single Gene Mutation, Genetic Association	2		14.65	16
SHANK2	SH3 And Multiple Ankyrin Repeat Domains 2	ENSG00000162105	Atrial Septal Defect 1	400	Pathogenic 5		Rare Single Gene Mutation, Syndromic, Genetic Association, Functional	1		18.55	54
SMAD4	SMAD Family Member 4	ENSG00000141646	Tetralogy of Fallot	13.04	DISEASES inferred 14 GeneCards inferred via : Publications (show sections)		Rare Single Gene Mutation, Syndromic, Functional	2			11
SMARCA4	SWI/SNF Related, Matrix Associated, Actin Dependent Regulator Of Chromatin, Subfamily A, Member 4	ENSG00000127616	Ventricular Septal Defect	30.14	Likely pathogenic 5 DISEASES inferred 14		Rare Single Gene Mutation, Syndromic, Functional	1			23
SMARCA4	SWI/SNF Related, Matrix Associated, Actin Dependent Regulator Of Chromatin, Subfamily A, Member 4	ENSG00000127616	Interatrial Communication	25	Likely pathogenic 5		Rare Single Gene Mutation, Syndromic, Functional	1			23
SMARCA4	SWI/SNF Related, Matrix Associated, Actin Dependent Regulator Of Chromatin, Subfamily A, Member 4	ENSG00000127616	Atrial Heart Septal Defect	29.78	Likely pathogenic 5 DISEASES inferred 14		Rare Single Gene Mutation, Syndromic, Functional	1			23
STAG1	STAG1 Cohesin Complex Component	ENSG00000118007	Atrial Septal Defect 1	4.98	DISEASES inferred 14		Rare Single Gene Mutation, Syndromic		SYNDROMIC		10
STX1A	Syntaxin 1A	ENSG00000106089	Supravalvular Aortic Stenosis	5.3	DISEASES inferred 14		Rare Single Gene Mutation, Genetic Association	2			7
TBX1	T-Box Transcription Factor 1	ENSG00000184058	Double Outlet Right Ventricle	6.48	DISEASES inferred 14		Rare Single Gene Mutation, Syndromic, Functional		SYNDROMIC		7
TBX1	T-Box Transcription Factor 1	ENSG00000184058	Heart Septal Defect	7.35	DISEASES inferred 14		Rare Single Gene Mutation, Syndromic, Functional		SYNDROMIC		7
TBX1	T-Box Transcription Factor 1	ENSG00000184058	Ventricular Septal Defect	14.96	DISEASES inferred 14 GeneCards inferred via : Disorders (show sections)		Rare Single Gene Mutation, Syndromic, Functional		SYNDROMIC		7
TBX1	T-Box Transcription Factor 1	ENSG00000184058	Hypoplastic Left Heart Syndrome	5.7	DISEASES inferred 14		Rare Single Gene Mutation, Syndromic, Functional		SYNDROMIC		7
TBX1	T-Box Transcription Factor 1	ENSG00000184058	Atrioventricular Septal Defect	6.58	DISEASES inferred 14		Rare Single Gene Mutation, Syndromic, Functional		SYNDROMIC		7
TBX1	T-Box Transcription Factor 1	ENSG00000184058	Patent Ductus Arteriosus 1	5.91	DISEASES inferred 14		Rare Single Gene Mutation, Syndromic, Functional		SYNDROMIC		7
TBX1	T-Box Transcription Factor 1	ENSG00000184058	Conotruncal Heart Malformations	1300	Molecular basis known 57 Pathogenic 5 Causative variation 73 Genetic Tests 28	14585638 15703190 17273972	Rare Single Gene Mutation, Syndromic, Functional		SYNDROMIC		7
TBX1	T-Box Transcription Factor 1	ENSG00000184058	Transposition of the Great Arteries, Dextro-Looped	4.76	DISEASES inferred 14		Rare Single Gene Mutation, Syndromic, Functional		SYNDROMIC		7
TBX1	T-Box Transcription Factor 1	ENSG00000184058	Tetralogy of Fallot	1076.37	Molecular basis known 57 Pathogenic 5 Genetic Tests 28 Likely pathogenic 5 Candidate gene tested 58 DISEASES inferred 14 GeneCards inferred via : Disorders Publications (show sections)	19948535 20937753	Rare Single Gene Mutation, Syndromic, Functional		SYNDROMIC		7
TBX1	T-Box Transcription Factor 1	ENSG00000184058	Atrial Heart Septal Defect	6.56	DISEASES inferred 14		Rare Single Gene Mutation, Syndromic, Functional		SYNDROMIC		7
TBX1	T-Box Transcription Factor 1	ENSG00000184058	Tricuspid Atresia	5.62	DISEASES inferred 14		Rare Single Gene Mutation, Syndromic, Functional		SYNDROMIC		7
TBX1	T-Box Transcription Factor 1	ENSG00000184058	Patent Foramen Ovale	5.14	DISEASES inferred 14		Rare Single Gene Mutation, Syndromic, Functional		SYNDROMIC		7
TMLHE	Trimethyllysine Hydroxylase, Epsilon	ENSG00000185973	Atrial Septal Defect 2	4.7	DISEASES inferred 14		Rare Single Gene Mutation, Genetic Association, Functional	2			10
TTN	Titin	ENSG00000155657	Ebstein Anomaly	13.31	DISEASES inferred 14 GeneCards inferred via : Publications (show sections)		Rare Single Gene Mutation, Syndromic	2	SYNDROMIC		33
TTN	Titin	ENSG00000155657	Arrhythmogenic Right Ventricular Dysplasia, Familial, 1	404.77	Pathogenic 5 DISEASES inferred 14		Rare Single Gene Mutation, Syndromic	2	SYNDROMIC		33
TTN	Titin	ENSG00000155657	Patent Ductus Arteriosus 1	5.45	DISEASES inferred 14		Rare Single Gene Mutation, Syndromic	2	SYNDROMIC		33
TTN	Titin	ENSG00000155657	Mitral Valve Insufficiency	6.04	DISEASES inferred 14		Rare Single Gene Mutation, Syndromic	2	SYNDROMIC		33
UPF2	UPF2 Regulator Of Nonsense Mediated MRNA Decay	ENSG00000151461	Atrial Septal Defect 8	4.89	DISEASES inferred 14		Rare Single Gene Mutation, Functional	2			10
ZBTB21	Zinc Finger And BTB Domain Containing 21	ENSG00000173276	Atrioventricular Septal Defect	6.22	DISEASES inferred 14		Rare Single Gene Mutation	1			4
ZFHX3	Zinc Finger Homeobox 3	ENSG00000140836	Heart Septal Defect	8.14	DISEASES inferred 14 14		Rare Single Gene Mutation, Syndromic	3	SYNDROMIC		12
ZFHX3	Zinc Finger Homeobox 3	ENSG00000140836	Atrial Heart Septal Defect	6.81	DISEASES inferred 14 14		Rare Single Gene Mutation, Syndromic	3	SYNDROMIC		12
ZFHX3	Zinc Finger Homeobox 3	ENSG00000140836	Ventricular Septal Defect	7.85	DISEASES inferred 14 14		Rare Single Gene Mutation, Syndromic	3	SYNDROMIC		12

## Sheet: Supplemental Table 2
Supplemental Table 2. KEGG and GO Enrichment Analysis of the 23 Key Genes
KEGG
Enrichment FDR	nGenes	Pathway Genes	Fold Enrichment	Pathway	URL	Genes
0.00588223	5	530	9.7753	Pathways in cancer	http://www.genome.jp/kegg-bin/show_pathway?hsa05200	CREBBP IGF1 LAMB1 SMAD4 NOTCH1
0.00397398	3	71	43.7823	Adherens junction	http://www.genome.jp/kegg-bin/show_pathway?hsa04520	CREBBP PTPRB SMAD4
0.00613027	3	131	23.7294	FoxO signaling pathway	http://www.genome.jp/kegg-bin/show_pathway?hsa04068	CREBBP IGF1 SMAD4
0.00613027	3	126	24.671	Cell cycle	http://www.genome.jp/kegg-bin/show_pathway?hsa04110	CREBBP SMAD4 RAD21
0.00634385	3	143	21.7381	Signaling pathways regulating pluripotency of stem cells	http://www.genome.jp/kegg-bin/show_pathway?hsa04550	JARID2 IGF1 SMAD4
0.00761437	3	162	19.1886	JAK-STAT signaling pathway	http://www.genome.jp/kegg-bin/show_pathway?hsa04630	CREBBP LEP PTPN11
0.0241578	3	331	9.39138	Human papillomavirus infection	http://www.genome.jp/kegg-bin/show_pathway?hsa05165	CREBBP LAMB1 NOTCH1
0.0186531	2	59	35.1248	Notch signaling pathway	http://www.genome.jp/kegg-bin/show_pathway?hsa04330	CREBBP NOTCH1
0.0186531	2	67	30.9308	Long-term potentiation	http://www.genome.jp/kegg-bin/show_pathway?hsa04720	CREBBP RPS6KA3
0.0186531	2	69	30.0343	Adipocytokine signaling pathway	http://www.genome.jp/kegg-bin/show_pathway?hsa04920	LEP PTPN11
0.0186531	2	68	30.4759	Renal cell carcinoma	http://www.genome.jp/kegg-bin/show_pathway?hsa05211	CREBBP PTPN11
0.0205165	2	76	27.2679	Chronic myeloid leukemia	http://www.genome.jp/kegg-bin/show_pathway?hsa05220	SMAD4 PTPN11
0.0241578	2	95	21.8144	Endocrine resistance	http://www.genome.jp/kegg-bin/show_pathway?hsa01522	IGF1 NOTCH1
0.0241578	2	93	22.2835	TGF-beta signaling pathway	http://www.genome.jp/kegg-bin/show_pathway?hsa04350	CREBBP SMAD4
0.0241578	2	100	20.7236	Progesterone-mediated oocyte maturation	http://www.genome.jp/kegg-bin/show_pathway?hsa04914	IGF1 RPS6KA3
0.0241578	2	97	21.3646	Prostate cancer	http://www.genome.jp/kegg-bin/show_pathway?hsa05215	CREBBP IGF1
0.0254005	2	109	19.0125	HIF-1 signaling pathway	http://www.genome.jp/kegg-bin/show_pathway?hsa04066	CREBBP IGF1
0.0254005	2	108	19.1886	Insulin resistance	http://www.genome.jp/kegg-bin/show_pathway?hsa04931	RPS6KA3 PTPN11
0.0254551	2	120	17.2697	AMPK signaling pathway	http://www.genome.jp/kegg-bin/show_pathway?hsa04152	IGF1 LEP
0.0254551	2	119	17.4148	Neurotrophin signaling pathway	http://www.genome.jp/kegg-bin/show_pathway?hsa04722	RPS6KA3 PTPN11
0.0254551	2	121	17.127	Thyroid hormone signaling pathway	http://www.genome.jp/kegg-bin/show_pathway?hsa04919	CREBBP NOTCH1
0.0254551	2	119	17.4148	Growth hormone synthesis, secretion and action	http://www.genome.jp/kegg-bin/show_pathway?hsa04935	CREBBP IGF1
0.02756	2	129	16.0648	Oocyte meiosis	http://www.genome.jp/kegg-bin/show_pathway?hsa04114	IGF1 RPS6KA3
0.0339718	2	147	14.0977	Breast cancer	http://www.genome.jp/kegg-bin/show_pathway?hsa05224	IGF1 NOTCH1
0.0356585	2	154	13.4569	MTOR signaling pathway	http://www.genome.jp/kegg-bin/show_pathway?hsa04150	IGF1 RPS6KA3
0.0359506	2	161	12.8718	Hepatitis B	http://www.genome.jp/kegg-bin/show_pathway?hsa05161	CREBBP SMAD4
0.0359506	2	161	12.8718	MicroRNAs in cancer	http://www.genome.jp/kegg-bin/show_pathway?hsa05206	CREBBP NOTCH1
0.0367533	2	166	12.4841	Wnt signaling pathway	http://www.genome.jp/kegg-bin/show_pathway?hsa04310	CREBBP SMAD4
0.0486426	2	200	10.3618	Focal adhesion	http://www.genome.jp/kegg-bin/show_pathway?hsa04510	IGF1 LAMB1
0.0486426	2	203	10.2087	Viral carcinogenesis	http://www.genome.jp/kegg-bin/show_pathway?hsa05203	CREBBP HDAC8
0.0486426	2	202	10.2592	Proteoglycans in cancer	http://www.genome.jp/kegg-bin/show_pathway?hsa05205	IGF1 PTPN11
0.0557624	2	222	9.33497	Human T-cell leukemia virus 1 infection	http://www.genome.jp/kegg-bin/show_pathway?hsa05166	CREBBP SMAD4
0.0582514	2	231	8.97127	Ras signaling pathway	http://www.genome.jp/kegg-bin/show_pathway?hsa04014	IGF1 PTPN11
0.0883863	2	294	7.04886	MAPK signaling pathway	http://www.genome.jp/kegg-bin/show_pathway?hsa04010	IGF1 RPS6KA3
0.113812	2	354	5.85413	PI3K-Akt signaling pathway	http://www.genome.jp/kegg-bin/show_pathway?hsa04151	IGF1 LAMB1
GO-BP
Enrichment FDR	nGenes	Pathway Genes	Fold Enrichment	Pathway	URL	Genes
3.59061e-06	11	1127	10.1136	Circulatory system development	http://amigo.geneontology.org/amigo/term/GO:0072359	JARID2 IGF1 MIB1 PTPRB SMAD4 NOTCH1 CHD7 LEP PTPN11 TBX1 GTF2I
3.17118e-05	10	1264	8.19764	Positive regulation of transcription by RNA polymerase II	http://amigo.geneontology.org/amigo/term/GO:0045944	CREBBP IGF1 CDK8 SMAD4 HDAC8 NOTCH1 CHD7 RPS6KA3 TBX1 GTF2I
0.000124855	10	1716	6.03836	Positive regulation of transcription, DNA-templated	http://amigo.geneontology.org/amigo/term/GO:0045893	CREBBP IGF1 CDK8 SMAD4 HDAC8 NOTCH1 CHD7 RPS6KA3 TBX1 GTF2I
0.000124855	10	1717	6.03484	Positive regulation of RNA biosynthetic process	http://amigo.geneontology.org/amigo/term/GO:1902680	CREBBP IGF1 CDK8 SMAD4 HDAC8 NOTCH1 CHD7 RPS6KA3 TBX1 GTF2I
0.000124855	10	1716	6.03836	Positive regulation of nucleic acid-templated transcription	http://amigo.geneontology.org/amigo/term/GO:1903508	CREBBP IGF1 CDK8 SMAD4 HDAC8 NOTCH1 CHD7 RPS6KA3 TBX1 GTF2I
0.00012592	10	1738	5.96192	Regulation of cell differentiation	http://amigo.geneontology.org/amigo/term/GO:0045595	CREBBP IGF1 MIB1 SMAD4 NOTCH1 CHD7 LEP RPS6KA3 PTPN11 TBX1
0.000186488	10	1895	5.46798	Positive regulation of RNA metabolic process	http://amigo.geneontology.org/amigo/term/GO:0051254	CREBBP IGF1 CDK8 SMAD4 HDAC8 NOTCH1 CHD7 RPS6KA3 TBX1 GTF2I
0.000210835	10	1970	5.25981	Positive regulation of macromolecule biosynthetic process	http://amigo.geneontology.org/amigo/term/GO:0010557	CREBBP IGF1 CDK8 SMAD4 HDAC8 NOTCH1 CHD7 RPS6KA3 TBX1 GTF2I
3.62293e-05	9	962	9.69401	Negative regulation of developmental process	http://amigo.geneontology.org/amigo/term/GO:0051093	JARID2 IGF1 MIB1 SMAD4 NOTCH1 LEP PTPN11 TBX1 GTF2I
9.16283e-05	9	1183	7.88304	Anatomical structure formation involved in morphogenesis	http://amigo.geneontology.org/amigo/term/GO:0048646	LAMB1 MIB1 PTPRB SMAD4 NOTCH1 LEP PTPN11 TBX1 GTF2I
0.000176558	9	1438	6.48514	Regulation of multicellular organismal development	http://amigo.geneontology.org/amigo/term/GO:2000026	CREBBP JARID2 IGF1 SMAD4 NOTCH1 CHD7 LEP PTPN11 GTF2I
1.66559e-05	8	583	14.2186	Heart development	http://amigo.geneontology.org/amigo/term/GO:0007507	JARID2 IGF1 MIB1 SMAD4 NOTCH1 CHD7 PTPN11 TBX1
0.000119616	8	886	9.35604	Tube morphogenesis	http://amigo.geneontology.org/amigo/term/GO:0035239	MIB1 PTPRB SMAD4 NOTCH1 CHD7 LEP TBX1 GTF2I
0.000145236	8	985	8.41569	Growth	http://amigo.geneontology.org/amigo/term/GO:0040007	JARID2 IGF1 SMAD4 NOTCH1 CHD7 LEP RPS6KA3 PTPN11
0.000205893	8	1105	7.50177	Central nervous system development	http://amigo.geneontology.org/amigo/term/GO:0007417	JARID2 LAMB1 NOTCH1 CHD7 LEP RPS6KA3 PTPN11 TBX1
0.000205893	8	1102	7.52219	Embryo development	http://amigo.geneontology.org/amigo/term/GO:0009790	CREBBP IGF1 LAMB1 MIB1 SMAD4 NOTCH1 CHD7 TBX1
0.000205893	8	1094	7.5772	Tube development	http://amigo.geneontology.org/amigo/term/GO:0035295	MIB1 PTPRB SMAD4 NOTCH1 CHD7 LEP TBX1 GTF2I
0.000572244	8	1368	6.05954	Peptidyl-amino acid modification	http://amigo.geneontology.org/amigo/term/GO:0018193	CREBBP JARID2 IGF1 SMAD4 MSL2 LEP RPS6KA3 PTPN11
0.0013954	8	1644	5.04225	Regulation of protein modification process	http://amigo.geneontology.org/amigo/term/GO:0031399	JARID2 IGF1 PTPRB SMAD4 HDAC8 LEP PTPN11 TBX1
0.0015436	8	1678	4.94008	Protein phosphorylation	http://amigo.geneontology.org/amigo/term/GO:0006468	IGF1 PTPRB CDK8 SMAD4 LEP RPS6KA3 PTPN11 TBX1
0.0031034	8	1911	4.33776	Homeostatic process	http://amigo.geneontology.org/amigo/term/GO:0042592	CREBBP SMAD4 NOTCH1 CHD7 NBEA LEP PTPN11 GTF2I
0.000124855	7	640	11.3332	Developmental growth	http://amigo.geneontology.org/amigo/term/GO:0048589	JARID2 IGF1 SMAD4 NOTCH1 CHD7 LEP PTPN11
0.000124855	7	622	11.6612	Embryonic morphogenesis	http://amigo.geneontology.org/amigo/term/GO:0048598	CREBBP LAMB1 MIB1 SMAD4 NOTCH1 CHD7 TBX1
0.000151649	7	692	10.4816	Regulation of growth	http://amigo.geneontology.org/amigo/term/GO:0040008	JARID2 IGF1 SMAD4 NOTCH1 CHD7 LEP RPS6KA3
0.000166772	7	717	10.1161	Blood vessel development	http://amigo.geneontology.org/amigo/term/GO:0001568	MIB1 PTPRB NOTCH1 CHD7 LEP TBX1 GTF2I
0.000200899	7	748	9.69689	Vasculature development	http://amigo.geneontology.org/amigo/term/GO:0001944	MIB1 PTPRB NOTCH1 CHD7 LEP TBX1 GTF2I
0.000866203	7	1069	6.7851	Hematopoietic or lymphoid organ development	http://amigo.geneontology.org/amigo/term/GO:0048534	CREBBP JARID2 NOTCH1 CHD7 LEP PTPN11 TBX1
0.000994658	7	1111	6.5286	Negative regulation of multicellular organismal process	http://amigo.geneontology.org/amigo/term/GO:0051241	JARID2 IGF1 SMAD4 NOTCH1 LEP PTPN11 GTF2I
0.00107426	7	1129	6.42451	Immune system development	http://amigo.geneontology.org/amigo/term/GO:0002520	CREBBP JARID2 NOTCH1 CHD7 LEP PTPN11 TBX1
0.00272061	7	1373	5.28279	Positive regulation of developmental process	http://amigo.geneontology.org/amigo/term/GO:0051094	IGF1 SMAD4 NOTCH1 CHD7 LEP RPS6KA3 TBX1
0.0037479	7	1489	4.87124	Secretion by cell	http://amigo.geneontology.org/amigo/term/GO:0032940	IGF1 PTPRB SMAD4 NOTCH1 CHD7 LEP PTPN11
0.00389971	7	1505	4.81945	Cellular response to endogenous stimulus	http://amigo.geneontology.org/amigo/term/GO:0071495	CREBBP IGF1 SMAD4 NOTCH1 LEP PTPN11 TBX1
0.0042765	7	1545	4.69467	Export from cell	http://amigo.geneontology.org/amigo/term/GO:0140352	IGF1 PTPRB SMAD4 NOTCH1 CHD7 LEP PTPN11
0.00471134	7	1577	4.59941	Reproductive process	http://amigo.geneontology.org/amigo/term/GO:0022414	IGF1 SMAD4 NOTCH1 RAD21 CHD7 LEP PTPN11
0.00472851	7	1580	4.59068	Reproduction	http://amigo.geneontology.org/amigo/term/GO:0000003	IGF1 SMAD4 NOTCH1 RAD21 CHD7 LEP PTPN11
0.00518537	7	1614	4.49397	Positive regulation of multicellular organismal process	http://amigo.geneontology.org/amigo/term/GO:0051240	CREBBP IGF1 SMAD4 NOTCH1 CHD7 LEP PTPN11
0.00532434	7	1624	4.4663	Generation of neurons	http://amigo.geneontology.org/amigo/term/GO:0048699	LAMB1 MIB1 SMAD4 NOTCH1 CHD7 LEP PTPN11
0.00540137	7	1636	4.43354	Secretion	http://amigo.geneontology.org/amigo/term/GO:0046903	IGF1 PTPRB SMAD4 NOTCH1 CHD7 LEP PTPN11
0.00550208	7	1644	4.41197	Positive regulation of signal transduction	http://amigo.geneontology.org/amigo/term/GO:0009967	CREBBP IGF1 SMAD4 NOTCH1 LEP PTPN11 TBX1
0.00726634	7	1757	4.12821	Neurogenesis	http://amigo.geneontology.org/amigo/term/GO:0022008	LAMB1 MIB1 SMAD4 NOTCH1 CHD7 LEP PTPN11
0.00749383	7	1769	4.10021	Response to endogenous stimulus	http://amigo.geneontology.org/amigo/term/GO:0009719	CREBBP IGF1 SMAD4 NOTCH1 LEP PTPN11 TBX1
0.0084271	7	1817	3.99189	Regulation of cell population proliferation	http://amigo.geneontology.org/amigo/term/GO:0042127	JARID2 IGF1 LAMB1 SMAD4 NOTCH1 LEP TBX1
0.00881662	7	1835	3.95274	Positive regulation of cell communication	http://amigo.geneontology.org/amigo/term/GO:0010647	CREBBP IGF1 SMAD4 NOTCH1 LEP PTPN11 TBX1
0.00889447	7	1842	3.93772	Positive regulation of signaling	http://amigo.geneontology.org/amigo/term/GO:0023056	CREBBP IGF1 SMAD4 NOTCH1 LEP PTPN11 TBX1
0.00897678	7	1847	3.92706	Regulation of cell death	http://amigo.geneontology.org/amigo/term/GO:0010941	CREBBP IGF1 SMAD4 NOTCH1 LEP RPS6KA3 TBX1
0.0102079	7	1910	3.79752	Regulation of transport	http://amigo.geneontology.org/amigo/term/GO:0051049	IGF1 MIB1 SMAD4 NOTCH1 CHD7 LEP PTPN11
0.0120208	7	1982	3.65957	Locomotion	http://amigo.geneontology.org/amigo/term/GO:0040011	IGF1 LAMB1 SMAD4 NOTCH1 LEP PTPN11 TBX1
0.0123569	7	1997	3.63208	Cell cycle	http://amigo.geneontology.org/amigo/term/GO:0007049	IGF1 CDK8 HDAC8 RAD21 LEP RPS6KA3 PTPN11
0.000124467	6	376	16.5348	Striated muscle tissue development	http://amigo.geneontology.org/amigo/term/GO:0014706	JARID2 IGF1 SMAD4 NOTCH1 CHD7 TBX1
0.000124855	6	394	15.7794	Muscle tissue development	http://amigo.geneontology.org/amigo/term/GO:0060537	JARID2 IGF1 SMAD4 NOTCH1 CHD7 TBX1
0.000295419	6	527	11.7971	Skeletal system development	http://amigo.geneontology.org/amigo/term/GO:0001501	IGF1 CHD7 LEP RPS6KA3 PTPN11 TBX1
0.000497686	6	606	10.2592	Regulation of system process	http://amigo.geneontology.org/amigo/term/GO:0044057	JARID2 IGF1 SMAD4 NOTCH1 LEP PTPN11
0.000497686	6	611	10.1753	Regulation of secretion by cell	http://amigo.geneontology.org/amigo/term/GO:1903530	IGF1 SMAD4 NOTCH1 CHD7 LEP PTPN11
0.000560362	6	635	9.79069	Blood vessel morphogenesis	http://amigo.geneontology.org/amigo/term/GO:0048514	PTPRB NOTCH1 CHD7 LEP TBX1 GTF2I
0.000572244	6	641	9.69905	Chordate embryonic development	http://amigo.geneontology.org/amigo/term/GO:0043009	IGF1 MIB1 SMAD4 NOTCH1 CHD7 TBX1
0.000576553	6	646	9.62398	Regulation of MAPK cascade	http://amigo.geneontology.org/amigo/term/GO:0043408	IGF1 SMAD4 NOTCH1 LEP PTPN11 TBX1
0.000641882	6	661	9.40558	Embryo development ending in birth or egg hatching	http://amigo.geneontology.org/amigo/term/GO:0009792	IGF1 MIB1 SMAD4 NOTCH1 CHD7 TBX1
0.000680027	6	670	9.27924	Regulation of secretion	http://amigo.geneontology.org/amigo/term/GO:0051046	IGF1 SMAD4 NOTCH1 CHD7 LEP PTPN11
0.000880672	6	718	8.6589	Negative regulation of cell differentiation	http://amigo.geneontology.org/amigo/term/GO:0045596	IGF1 MIB1 SMAD4 NOTCH1 PTPN11 TBX1
0.00264569	6	944	6.5859	MAPK cascade	http://amigo.geneontology.org/amigo/term/GO:0000165	IGF1 SMAD4 NOTCH1 LEP PTPN11 TBX1
0.00274788	6	957	6.49644	Negative regulation of transcription by RNA polymerase II	http://amigo.geneontology.org/amigo/term/GO:0000122	CREBBP JARID2 SMAD4 HDAC8 NOTCH1 LEP
0.00350407	6	1018	6.10716	Positive regulation of protein modification process	http://amigo.geneontology.org/amigo/term/GO:0031401	JARID2 IGF1 SMAD4 LEP PTPN11 TBX1
0.00370929	6	1038	5.98949	Developmental process involved in reproduction	http://amigo.geneontology.org/amigo/term/GO:0003006	IGF1 SMAD4 NOTCH1 CHD7 LEP PTPN11
0.0037479	6	1042	5.9665	Positive regulation of cell population proliferation	http://amigo.geneontology.org/amigo/term/GO:0008284	IGF1 LAMB1 SMAD4 NOTCH1 LEP TBX1
0.00472851	6	1115	5.57587	Negative regulation of cell death	http://amigo.geneontology.org/amigo/term/GO:0060548	IGF1 SMAD4 NOTCH1 LEP RPS6KA3 TBX1
0.00484499	6	1122	5.54108	Enzyme linked receptor protein signaling pathway	http://amigo.geneontology.org/amigo/term/GO:0007167	CREBBP IGF1 SMAD4 NOTCH1 LEP PTPN11
0.00501335	6	1133	5.48728	Animal organ morphogenesis	http://amigo.geneontology.org/amigo/term/GO:0009887	LAMB1 MIB1 SMAD4 NOTCH1 CHD7 TBX1
0.00550208	6	1167	5.32741	Regulation of protein phosphorylation	http://amigo.geneontology.org/amigo/term/GO:0001932	IGF1 PTPRB SMAD4 LEP PTPN11 TBX1
0.00634339	6	1209	5.14234	Regulation of cell cycle	http://amigo.geneontology.org/amigo/term/GO:0051726	IGF1 CDK8 HDAC8 RAD21 LEP PTPN11
0.00892449	6	1329	4.67802	Response to abiotic stimulus	http://amigo.geneontology.org/amigo/term/GO:0009628	CREBBP IGF1 SMAD4 NOTCH1 LEP PTPN11
0.0094509	6	1355	4.58826	Regulation of phosphorylation	http://amigo.geneontology.org/amigo/term/GO:0042325	IGF1 PTPRB SMAD4 LEP PTPN11 TBX1
0.0094509	6	1353	4.59504	Negative regulation of transcription, DNA-templated	http://amigo.geneontology.org/amigo/term/GO:0045892	CREBBP JARID2 SMAD4 HDAC8 NOTCH1 LEP
0.0094509	6	1355	4.58826	Negative regulation of nucleic acid-templated transcription	http://amigo.geneontology.org/amigo/term/GO:1903507	CREBBP JARID2 SMAD4 HDAC8 NOTCH1 LEP
0.00949249	6	1357	4.5815	Negative regulation of RNA biosynthetic process	http://amigo.geneontology.org/amigo/term/GO:1902679	CREBBP JARID2 SMAD4 HDAC8 NOTCH1 LEP
0.0128126	6	1469	4.23219	Positive regulation of cellular protein metabolic process	http://amigo.geneontology.org/amigo/term/GO:0032270	JARID2 IGF1 SMAD4 LEP PTPN11 TBX1
0.0128126	6	1469	4.23219	Negative regulation of RNA metabolic process	http://amigo.geneontology.org/amigo/term/GO:0051253	CREBBP JARID2 SMAD4 HDAC8 NOTCH1 LEP
0.0128793	6	1473	4.2207	Neuron differentiation	http://amigo.geneontology.org/amigo/term/GO:0030182	LAMB1 MIB1 SMAD4 NOTCH1 LEP PTPN11
0.0152813	6	1563	3.97767	Positive regulation of protein metabolic process	http://amigo.geneontology.org/amigo/term/GO:0051247	JARID2 IGF1 SMAD4 LEP PTPN11 TBX1
0.0164058	6	1590	3.91012	Cell migration	http://amigo.geneontology.org/amigo/term/GO:0016477	IGF1 LAMB1 NOTCH1 LEP PTPN11 TBX1
0.0165426	6	1595	3.89786	Regulation of phosphate metabolic process	http://amigo.geneontology.org/amigo/term/GO:0019220	IGF1 PTPRB SMAD4 LEP PTPN11 TBX1
0.0165426	6	1595	3.89786	Regulation of phosphorus metabolic process	http://amigo.geneontology.org/amigo/term/GO:0051174	IGF1 PTPRB SMAD4 LEP PTPN11 TBX1
0.0169659	6	1607	3.86876	Negative regulation of nucleobase-containing compound metabolic process	http://amigo.geneontology.org/amigo/term/GO:0045934	CREBBP JARID2 SMAD4 HDAC8 NOTCH1 LEP
0.0177019	6	1642	3.78629	Negative regulation of macromolecule biosynthetic process	http://amigo.geneontology.org/amigo/term/GO:0010558	CREBBP JARID2 SMAD4 HDAC8 NOTCH1 LEP
0.0177019	6	1639	3.79322	Regulation of apoptotic process	http://amigo.geneontology.org/amigo/term/GO:0042981	CREBBP IGF1 NOTCH1 LEP RPS6KA3 TBX1
0.0177019	6	1631	3.81183	Negative regulation of cellular macromolecule biosynthetic process	http://amigo.geneontology.org/amigo/term/GO:2000113	CREBBP JARID2 SMAD4 HDAC8 NOTCH1 LEP
0.0179051	6	1658	3.74975	Cell activation	http://amigo.geneontology.org/amigo/term/GO:0001775	IGF1 PTPRB SMAD4 CHD7 LEP PTPN11
0.0190899	6	1684	3.69186	Regulation of programmed cell death	http://amigo.geneontology.org/amigo/term/GO:0043067	CREBBP IGF1 NOTCH1 LEP RPS6KA3 TBX1
0.0199046	6	1702	3.65281	Negative regulation of cellular biosynthetic process	http://amigo.geneontology.org/amigo/term/GO:0031327	CREBBP JARID2 SMAD4 HDAC8 NOTCH1 LEP
0.020963	6	1734	3.5854	Negative regulation of biosynthetic process	http://amigo.geneontology.org/amigo/term/GO:0009890	CREBBP JARID2 SMAD4 HDAC8 NOTCH1 LEP
0.0228665	6	1776	3.50061	Cell motility	http://amigo.geneontology.org/amigo/term/GO:0048870	IGF1 LAMB1 NOTCH1 LEP PTPN11 TBX1
0.0228665	6	1776	3.50061	Localization of cell	http://amigo.geneontology.org/amigo/term/GO:0051674	IGF1 LAMB1 NOTCH1 LEP PTPN11 TBX1
0.0249777	6	1832	3.39361	Response to oxygen-containing compound	http://amigo.geneontology.org/amigo/term/GO:1901700	IGF1 NOTCH1 LEP RPS6KA3 PTPN11 TBX1
0.0260534	6	1866	3.33177	Response to other organism	http://amigo.geneontology.org/amigo/term/GO:0051707	CREBBP NOTCH1 CHD7 LEP RPS6KA3 PTPN11
0.0260741	6	1867	3.32999	Response to external biotic stimulus	http://amigo.geneontology.org/amigo/term/GO:0043207	CREBBP NOTCH1 CHD7 LEP RPS6KA3 PTPN11
0.0269729	6	1885	3.29819	Cell-cell signaling	http://amigo.geneontology.org/amigo/term/GO:0007267	SMAD4 NOTCH1 CHD7 LEP RPS6KA3 PTPN11
0.0272211	6	1896	3.27906	Regulation of intracellular signal transduction	http://amigo.geneontology.org/amigo/term/GO:1902531	IGF1 SMAD4 NOTCH1 LEP PTPN11 TBX1
0.0274546	6	1905	3.26356	Response to biotic stimulus	http://amigo.geneontology.org/amigo/term/GO:0009607	CREBBP NOTCH1 CHD7 LEP RPS6KA3 PTPN11
8.20615e-06	5	80	64.7614	Cardiac muscle hypertrophy	http://amigo.geneontology.org/amigo/term/GO:0003300	JARID2 IGF1 SMAD4 NOTCH1 LEP
8.20615e-06	5	85	60.9519	Muscle hypertrophy	http://amigo.geneontology.org/amigo/term/GO:0014896	JARID2 IGF1 SMAD4 NOTCH1 LEP
8.20615e-06	5	83	62.4206	Striated muscle hypertrophy	http://amigo.geneontology.org/amigo/term/GO:0014897	JARID2 IGF1 SMAD4 NOTCH1 LEP
6.94412e-05	5	162	31.9809	Organ growth	http://amigo.geneontology.org/amigo/term/GO:0035265	JARID2 IGF1 NOTCH1 LEP PTPN11
0.000124855	5	215	24.0973	Cardiac muscle tissue development	http://amigo.geneontology.org/amigo/term/GO:0048738	JARID2 IGF1 SMAD4 NOTCH1 CHD7
0.000187055	5	258	20.081	Heart morphogenesis	http://amigo.geneontology.org/amigo/term/GO:0003007	MIB1 SMAD4 NOTCH1 CHD7 TBX1
0.000205893	5	272	19.0475	Positive regulation of growth	http://amigo.geneontology.org/amigo/term/GO:0045927	IGF1 NOTCH1 CHD7 LEP RPS6KA3
0.00038852	5	324	15.9905	Regulation of developmental growth	http://amigo.geneontology.org/amigo/term/GO:0048638	JARID2 IGF1 NOTCH1 CHD7 LEP
0.000441868	5	340	15.238	Muscle organ development	http://amigo.geneontology.org/amigo/term/GO:0007517	IGF1 SMAD4 NOTCH1 CHD7 TBX1
0.000494126	5	349	14.845	Regulation of epithelial cell proliferation	http://amigo.geneontology.org/amigo/term/GO:0050678	IGF1 LAMB1 NOTCH1 LEP TBX1
0.000619359	5	385	13.4569	In utero embryonic development	http://amigo.geneontology.org/amigo/term/GO:0001701	IGF1 MIB1 SMAD4 NOTCH1 CHD7
0.000760642	5	409	12.6673	Epithelial cell proliferation	http://amigo.geneontology.org/amigo/term/GO:0050673	IGF1 LAMB1 NOTCH1 LEP TBX1
0.000914387	5	437	11.8556	Reproductive structure development	http://amigo.geneontology.org/amigo/term/GO:0048608	SMAD4 NOTCH1 CHD7 LEP PTPN11
0.000928291	5	440	11.7748	Reproductive system development	http://amigo.geneontology.org/amigo/term/GO:0061458	SMAD4 NOTCH1 CHD7 LEP PTPN11
0.000994658	5	448	11.5645	Muscle system process	http://amigo.geneontology.org/amigo/term/GO:0003012	JARID2 IGF1 SMAD4 NOTCH1 LEP
0.00110092	5	461	11.2384	Gland development	http://amigo.geneontology.org/amigo/term/GO:0048732	JARID2 SMAD4 NOTCH1 UPF2 TBX1
0.00113753	5	465	11.1417	Positive regulation of MAPK cascade	http://amigo.geneontology.org/amigo/term/GO:0043410	IGF1 NOTCH1 LEP PTPN11 TBX1
0.00139814	5	497	10.4244	Histone modification	http://amigo.geneontology.org/amigo/term/GO:0016570	CREBBP JARID2 SMAD4 HDAC8 MSL2
0.00200482	5	544	9.52373	Angiogenesis	http://amigo.geneontology.org/amigo/term/GO:0001525	PTPRB NOTCH1 LEP TBX1 GTF2I
0.00321855	5	627	8.26301	Muscle structure development	http://amigo.geneontology.org/amigo/term/GO:0061061	IGF1 SMAD4 NOTCH1 CHD7 TBX1
0.00471134	5	715	7.24603	Tissue morphogenesis	http://amigo.geneontology.org/amigo/term/GO:0048729	MIB1 SMAD4 NOTCH1 CHD7 TBX1
0.00484499	5	722	7.17577	Cellular response to growth factor stimulus	http://amigo.geneontology.org/amigo/term/GO:0071363	CREBBP SMAD4 NOTCH1 PTPN11 TBX1
0.00540137	5	750	6.90788	Response to growth factor	http://amigo.geneontology.org/amigo/term/GO:0070848	CREBBP SMAD4 NOTCH1 PTPN11 TBX1
0.0057456	5	767	6.75477	Positive regulation of protein phosphorylation	http://amigo.geneontology.org/amigo/term/GO:0001934	IGF1 SMAD4 LEP PTPN11 TBX1
0.00825261	5	856	6.05246	Head development	http://amigo.geneontology.org/amigo/term/GO:0060322	LAMB1 NOTCH1 CHD7 PTPN11 TBX1
0.0084271	5	862	6.01034	Positive regulation of phosphorylation	http://amigo.geneontology.org/amigo/term/GO:0042327	IGF1 SMAD4 LEP PTPN11 TBX1
0.00944219	5	897	5.77582	Positive regulation of cell differentiation	http://amigo.geneontology.org/amigo/term/GO:0045597	IGF1 SMAD4 NOTCH1 RPS6KA3 TBX1
0.00944219	5	896	5.78226	Multicellular organismal reproductive process	http://amigo.geneontology.org/amigo/term/GO:0048609	IGF1 SMAD4 NOTCH1 LEP PTPN11
0.010155	5	920	5.63142	Multicellular organism reproduction	http://amigo.geneontology.org/amigo/term/GO:0032504	IGF1 SMAD4 NOTCH1 LEP PTPN11
0.0105859	5	930	5.57087	Regulation of cytokine production	http://amigo.geneontology.org/amigo/term/GO:0001817	CREBBP IGF1 SMAD4 LEP PTPN11
0.0109085	5	937	5.52925	Cytokine production	http://amigo.geneontology.org/amigo/term/GO:0001816	CREBBP IGF1 SMAD4 LEP PTPN11
0.0110301	5	942	5.4999	Positive regulation of phosphorus metabolic process	http://amigo.geneontology.org/amigo/term/GO:0010562	IGF1 SMAD4 LEP PTPN11 TBX1
0.0110301	5	942	5.4999	Positive regulation of phosphate metabolic process	http://amigo.geneontology.org/amigo/term/GO:0045937	IGF1 SMAD4 LEP PTPN11 TBX1
0.0123569	5	978	5.29745	Negative regulation of apoptotic process	http://amigo.geneontology.org/amigo/term/GO:0043066	IGF1 NOTCH1 LEP RPS6KA3 TBX1
0.0131279	5	1000	5.18091	Cell-cell adhesion	http://amigo.geneontology.org/amigo/term/GO:0098609	IGF1 LAMB1 NOTCH1 LEP PTPN11
0.0131483	5	1001	5.17573	Negative regulation of programmed cell death	http://amigo.geneontology.org/amigo/term/GO:0043069	IGF1 NOTCH1 LEP RPS6KA3 TBX1
0.0135091	5	1013	5.11442	Positive regulation of transport	http://amigo.geneontology.org/amigo/term/GO:0051050	IGF1 MIB1 SMAD4 LEP PTPN11
0.0142474	5	1028	5.03979	Positive regulation of intracellular signal transduction	http://amigo.geneontology.org/amigo/term/GO:1902533	IGF1 NOTCH1 LEP PTPN11 TBX1
0.0143904	5	1031	5.02513	Hemopoiesis	http://amigo.geneontology.org/amigo/term/GO:0030097	CREBBP NOTCH1 CHD7 LEP PTPN11
0.0211756	5	1203	4.30666	Neuron development	http://amigo.geneontology.org/amigo/term/GO:0048666	LAMB1 SMAD4 NOTCH1 LEP PTPN11
0.0225739	5	1226	4.22586	Negative regulation of protein metabolic process	http://amigo.geneontology.org/amigo/term/GO:0051248	JARID2 IGF1 PTPRB HDAC8 RPS6KA3
0.0241618	5	1264	4.09882	Chemical homeostasis	http://amigo.geneontology.org/amigo/term/GO:0048878	SMAD4 CHD7 LEP PTPN11 GTF2I
0.0251774	5	1282	4.04127	Regulation of response to external stimulus	http://amigo.geneontology.org/amigo/term/GO:0032101	CREBBP IGF1 NOTCH1 LEP PTPN11
0.0274546	5	1336	3.87793	Positive regulation of gene expression	http://amigo.geneontology.org/amigo/term/GO:0010628	CREBBP IGF1 NOTCH1 LEP PTPN11
0.0314135	5	1421	3.64596	Epithelium development	http://amigo.geneontology.org/amigo/term/GO:0060429	MIB1 SMAD4 NOTCH1 CHD7 TBX1
0.0337606	5	1475	3.51248	Leukocyte activation	http://amigo.geneontology.org/amigo/term/GO:0045321	IGF1 PTPRB CHD7 LEP PTPN11
0.0380657	5	1537	3.37079	Negative regulation of cell communication	http://amigo.geneontology.org/amigo/term/GO:0010648	IGF1 SMAD4 NOTCH1 LEP PTPN11
0.0382401	5	1540	3.36423	Negative regulation of signaling	http://amigo.geneontology.org/amigo/term/GO:0023057	IGF1 SMAD4 NOTCH1 LEP PTPN11
0.0452046	5	1639	3.16102	Cell adhesion	http://amigo.geneontology.org/amigo/term/GO:0007155	IGF1 LAMB1 NOTCH1 LEP PTPN11
0.0454147	5	1646	3.14758	Biological adhesion	http://amigo.geneontology.org/amigo/term/GO:0022610	IGF1 LAMB1 NOTCH1 LEP PTPN11
GO-CC
Enrichment FDR	nGenes	Pathway Genes	Fold Enrichment	Pathway	URL	Genes
0.00292938	8	1379	6.01121	Nuclear protein-containing complex	http://amigo.geneontology.org/amigo/term/GO:0140513	CREBBP JARID2 CDK8 SMAD4 HDAC8 UPF2 RAD21 MSL2
0.136768	5	1918	2.7012	Chromosome	http://amigo.geneontology.org/amigo/term/GO:0005694	CREBBP SMAD4 HDAC8 RAD21 TBX1
0.140651	4	1316	3.14949	Chromatin	http://amigo.geneontology.org/amigo/term/GO:0000785	CREBBP SMAD4 RAD21 TBX1
0.188656	4	1540	2.69138	Catalytic complex	http://amigo.geneontology.org/amigo/term/GO:1902494	CREBBP JARID2 HDAC8 MSL2
0.159097	3	839	3.70506	Transferase complex	http://amigo.geneontology.org/amigo/term/GO:1990234	CREBBP JARID2 MSL2
0.198614	3	975	3.18825	Secretory granule	http://amigo.geneontology.org/amigo/term/GO:0030141	IGF1 PTPRB NOTCH1
0.0359634	2	78	26.5688	Histone acetyltransferase complex	http://amigo.geneontology.org/amigo/term/GO:0000123	CREBBP MSL2
0.0359634	2	88	23.5496	Protein acetyltransferase complex	http://amigo.geneontology.org/amigo/term/GO:0031248	CREBBP MSL2
0.0359634	2	88	23.5496	Acetyltransferase complex	http://amigo.geneontology.org/amigo/term/GO:1902493	CREBBP MSL2
0.110521	2	254	8.15891	Nuclear chromosome	http://amigo.geneontology.org/amigo/term/GO:0000228	HDAC8 RAD21
0.198101	2	422	4.91081	Receptor complex	http://amigo.geneontology.org/amigo/term/GO:0043235	PTPRB NOTCH1
GO-MF
Enrichment FDR	nGenes	Pathway Genes	Fold Enrichment	Pathway	URL	Genes
0.00300563	6	617	10.0763	Chromatin binding	http://amigo.geneontology.org/amigo/term/GO:0003682	CREBBP JARID2 SMAD4 NOTCH1 RAD21 CHD7
0.0995302	5	1722	3.00866	Signaling receptor binding	http://amigo.geneontology.org/amigo/term/GO:0005102	IGF1 LAMB1 NOTCH1 LEP PTPN11
0.101723	5	1767	2.93204	Sequence-specific DNA binding	http://amigo.geneontology.org/amigo/term/GO:0043565	SMAD4 UPF2 CHD7 TBX1
0.0589208	4	596	6.95424	Transcription factor binding	http://amigo.geneontology.org/amigo/term/GO:0008134	CREBBP JARID2 SMAD4 HDAC8
0.0589208	4	577	7.18324	Cell adhesion molecule binding	http://amigo.geneontology.org/amigo/term/GO:0050839	IGF1 LAMB1 PTPRB PTPN11
0.1237	4	1446	2.86634	Protein-containing complex binding	http://amigo.geneontology.org/amigo/term/GO:0044877	IGF1 LAMB1 SMAD4 PTPN11
0.131352	4	1515	2.73579	DNA-binding transcription factor activity	http://amigo.geneontology.org/amigo/term/GO:0003700	SMAD4 TBX1 GTF2I
0.106181	3	712	4.36593	Protein kinase binding	http://amigo.geneontology.org/amigo/term/GO:0019901	NBEA RPS6KA3 PTPN11
0.1194	3	794	3.91504	Kinase binding	http://amigo.geneontology.org/amigo/term/GO:0019900	NBEA RPS6KA3 PTPN11
0.193988	3	1253	2.48088	RNA polymerase II cis-regulatory region sequence-specific DNA binding	http://amigo.geneontology.org/amigo/term/GO:0000978	SMAD4 CHD7 TBX1
0.196687	3	1272	2.44383	Cis-regulatory region sequence-specific DNA binding	http://amigo.geneontology.org/amigo/term/GO:0000987	SMAD4 CHD7 TBX1
0.0112578	2	23	90.1028	Insulin receptor binding	http://amigo.geneontology.org/amigo/term/GO:0005158	IGF1 PTPN11
0.0112578	2	21	98.684	Peptide hormone receptor binding	http://amigo.geneontology.org/amigo/term/GO:0051428	LEP PTPN11
0.019718	2	35	59.2104	Hormone receptor binding	http://amigo.geneontology.org/amigo/term/GO:0051427	LEP PTPN11
0.0733984	2	108	19.1886	Chromatin DNA binding	http://amigo.geneontology.org/amigo/term/GO:0031490	CREBBP NOTCH1
0.0766688	2	116	17.8652	Protein tyrosine phosphatase activity	http://amigo.geneontology.org/amigo/term/GO:0004725	PTPRB PTPN11
0.084537	2	152	13.634	Integrin binding	http://amigo.geneontology.org/amigo/term/GO:0005178	IGF1 LAMB1
0.084537	2	130	15.9413	Hormone activity	http://amigo.geneontology.org/amigo/term/GO:0005179	IGF1 LEP
0.0990189	2	199	10.4139	Phosphoprotein phosphatase activity	http://amigo.geneontology.org/amigo/term/GO:0004721	PTPRB PTPN11
0.118634	2	305	6.79463	Phosphatase activity	http://amigo.geneontology.org/amigo/term/GO:0016791	PTPRB PTPN11
0.119029	2	312	6.64219	Transcription coactivator activity	http://amigo.geneontology.org/amigo/term/GO:0003713	CREBBP NOTCH1
0.120892	2	354	5.85413	Cadherin binding	http://amigo.geneontology.org/amigo/term/GO:0045296	PTPRB PTPN11
0.131206	2	378	5.48244	Protein serine kinase activity	http://amigo.geneontology.org/amigo/term/GO:0106310	CDK8 RPS6KA3
0.133458	2	403	5.14234	Phosphoric ester hydrolase activity	http://amigo.geneontology.org/amigo/term/GO:0042578	PTPRB PTPN11
0.146713	2	474	4.37208	DNA-binding transcription activator activity	http://amigo.geneontology.org/amigo/term/GO:0001216	SMAD4 GTF2I
0.146713	2	468	4.42813	DNA-binding transcription activator activity, RNA polymerase II-specific	http://amigo.geneontology.org/amigo/term/GO:0001228	SMAD4 GTF2I
0.146713	2	470	4.40928	Protein serine/threonine kinase activity	http://amigo.geneontology.org/amigo/term/GO:0004674	CDK8 RPS6KA3
0.162106	2	515	4.02401	Ubiquitin-protein transferase activity	http://amigo.geneontology.org/amigo/term/GO:0004842	MIB1 MSL2
0.170456	2	538	3.85198	Ubiquitin-like protein transferase activity	http://amigo.geneontology.org/amigo/term/GO:0019787	MIB1 MSL2
0.172822	2	550	3.76793	Transcription coregulator activity	http://amigo.geneontology.org/amigo/term/GO:0003712	CREBBP NOTCH1
0.174624	2	561	3.69405	Receptor ligand activity	http://amigo.geneontology.org/amigo/term/GO:0048018	IGF1 LEP
0.17596	2	574	3.61039	Signaling receptor activator activity	http://amigo.geneontology.org/amigo/term/GO:0030546	IGF1 LEP
0.196687	2	631	3.28425	Protein kinase activity	http://amigo.geneontology.org/amigo/term/GO:0004672	CDK8 RPS6KA3
0.196687	2	629	3.2947	Signaling receptor regulator activity	http://amigo.geneontology.org/amigo/term/GO:0030545	IGF1 LEP

## Sheet: Supplemental Table 3
Supplemental Table 3. Enriched Transcription Factors Regulating 23 Shared Genes Between CHD and ASD
Query Name	Rank	TF	Score	Library	Overlapping_Genes
gene_set_query	1	KMT2A	9.333	ARCHS4 Coexpression,6;ReMap ChIP-seq,2;GTEx Coexpression,20	MECP2,SPEN,KMT2A,ZNF83,RFX7,ZBTB10,SMAD9,TCF20,ASH1L,ARID2,ZNF8,BPTF
gene_set_query	2	SPEN	17.5	ARCHS4 Coexpression,11;GTEx Coexpression,24	MECP2,SMAD4,KMT2A,SETBP1,TCF20,ASH1L,BPTF
gene_set_query	3	MGA	34	ARCHS4 Coexpression,2;Enrichr Queries,63;GTEx Coexpression,37	SPEN,SETDB1,KMT2A,ZNF507,ZBTB10,TCF20,ASH1L,ARID2,BPTF
gene_set_query	4	ZNF678	34.67	ARCHS4 Coexpression,85;Enrichr Queries,8;GTEx Coexpression,11	SMAD4,REST,ZZZ3,KMT2A,ZNF83,ZNF507,RFX7,PRDM5,ZBTB10,ASH1L,ARID2,BPTF
gene_set_query	5	ZKSCAN8	35.5	ARCHS4 Coexpression,65;GTEx Coexpression,6	SPEN,SMAD4,KMT2A,SETBP1,ZNF507,RFX7,PRDM5,ASH1L
gene_set_query	6	ZFX	38.8	Literature ChIP-seq,33;ARCHS4 Coexpression,69;Enrichr Queries,10;ReMap ChIP-seq,26;GTEx Coexpression,56	ZNF584,SMAD4,KMT2A,PRDM5,ZBTB10,XPA,ASH1L,NRF1,REST,ZZZ3,SETBP1,ZNF507,RFX7,ARID2,BPTF
gene_set_query	7	ZBED6	39	ARCHS4 Coexpression,39	ZZZ3,KMT2A,ASH1L
gene_set_query	8	PRDM2	39.33	ARCHS4 Coexpression,29;Enrichr Queries,41;GTEx Coexpression,48	SPEN,KMT2A,SETBP1,ASH1L,ARID2,BPTF
gene_set_query	9	FOXJ3	42	ARCHS4 Coexpression,33;Enrichr Queries,38;GTEx Coexpression,55	SPEN,SMAD4,ZZZ3,KMT2A,ZNF507,RFX7,TCF20,ASH1L,ARID2,BPTF
gene_set_query	10	ADNP	45.75	ARCHS4 Coexpression,41;Enrichr Queries,35;ReMap ChIP-seq,100;GTEx Coexpression,7	SPEN,REST,ZZZ3,SETDB1,KMT2A,ZNF507,RFX7,ZBTB10,TCF20,ASH1L,ARID2,BPTF
gene_set_query	11	BPTF	51	ARCHS4 Coexpression,17;GTEx Coexpression,85	SPEN,KMT2A,RFX7,ASH1L,ARID2
gene_set_query	12	ZNF12	52.67	ARCHS4 Coexpression,4;Enrichr Queries,55;GTEx Coexpression,99	SPEN,SMAD4,REST,KMT2A,ZNF83,RFX7,ZBTB10,ARID2,BPTF
gene_set_query	13	ZNF280D	58	ARCHS4 Coexpression,98;Enrichr Queries,59;GTEx Coexpression,17	SMAD4,ZZZ3,SETBP1,KMT2A,ZNF83,RFX7,PRDM5,ZBTB10,ARID2,ZNF8,BPTF
gene_set_query	14	ZNF148	58.67	ARCHS4 Coexpression,86;Enrichr Queries,76;GTEx Coexpression,14	SMAD4,REST,ZZZ3,KMT2A,ZNF507,SMAD9,ASH1L,ARID2,BPTF
gene_set_query	15	CARF	61	ARCHS4 Coexpression,114;GTEx Coexpression,8	SMAD4,KMT2A,ZNF83,ZNF507,PRDM5,ASH1L,ZNF8,BPTF
gene_set_query	16	ZNF507	61	ARCHS4 Coexpression,5;Enrichr Queries,4;GTEx Coexpression,174	SPEN,SMAD4,ZZZ3,KMT2A,RFX7,ZBTB10,TCF20,ASH1L,ARID2,BPTF
gene_set_query	17	MECP2	62.67	ARCHS4 Coexpression,87;Enrichr Queries,43;GTEx Coexpression,58	SPEN,SMAD4,KMT2A,SETBP1,NRF1,ASH1L,ESR1,BPTF
gene_set_query	18	ASH1L	65.67	ARCHS4 Coexpression,58;Enrichr Queries,134;GTEx Coexpression,5	MECP2,SPEN,SMAD4,KMT2A,SETBP1,ZNF507,RFX7,BPTF
gene_set_query	19	POU2F1	67.5	ARCHS4 Coexpression,64;Enrichr Queries,25;ReMap ChIP-seq,154;GTEx Coexpression,27	MECP2,SPEN,ZNF584,SMAD4,KMT2A,RFX7,NRF1,ASH1L,ARID2,ZNF8,BPTF
gene_set_query	20	ZNF644	67.75	ARCHS4 Coexpression,91;Enrichr Queries,3;ReMap ChIP-seq,143;GTEx Coexpression,34	SPEN,SMAD4,ZZZ3,KMT2A,ZNF507,RFX7,ASH1L,ARID2,BPTF
gene_set_query	21	NCOA2	71.5	ARCHS4 Coexpression,106;Enrichr Queries,42;ReMap ChIP-seq,12;GTEx Coexpression,126	SPEN,SMAD4,SETDB1,KMT2A,XPA,TCF20,PRDM1,ASH1L,ARID2,ESR1,BPTF
gene_set_query	22	BAZ2B	73.67	ARCHS4 Coexpression,63;Enrichr Queries,72;GTEx Coexpression,86	KMT2A,SETBP1,ZNF83,ASH1L,ARID2,ZNF8,BPTF
gene_set_query	23	NFAT5	76	ARCHS4 Coexpression,25;Enrichr Queries,114;GTEx Coexpression,89	SPEN,REST,ZZZ3,KMT2A,TCF20,ASH1L,BPTF
gene_set_query	24	SMAD4	80	Literature ChIP-seq,31;ARCHS4 Coexpression,149;Enrichr Queries,83;ReMap ChIP-seq,4;GTEx Coexpression,133	SPEN,KMT2A,ZBTB10,TCF20,ASH1L,PRDM1,ESR1,REST,SETBP1,ZNF507,TCF4,ARID2,TP63,BPTF
gene_set_query	25	NFX1	83.33	ARCHS4 Coexpression,105;Enrichr Queries,26;GTEx Coexpression,119	ZNF584,SPEN,SMAD4,ZZZ3,KMT2A,ZNF507,RFX7,PRDM5,ASH1L,ARID2,ZNF8,BPTF
gene_set_query	26	ZNF451	89.67	ARCHS4 Coexpression,73;Enrichr Queries,15;GTEx Coexpression,181	SPEN,SMAD4,KMT2A,RFX7,ASH1L,ARID2,BPTF
gene_set_query	27	CREB1	90.83	Literature ChIP-seq,130;ARCHS4 Coexpression,37;ENCODE ChIP-seq,90;Enrichr Queries,16;ReMap ChIP-seq,200;GTEx Coexpression,72	ZNF584,SPEN,SMAD4,SETDB1,KMT2A,SMAD9,ZNF8,ESR1,REST,MYOD1,TCF4,ARID2,BPTF
gene_set_query	28	ZNF514	94.67	ARCHS4 Coexpression,31;Enrichr Queries,160;GTEx Coexpression,93	SMAD4,KMT2A,SETBP1,ZNF83,ASH1L,ZNF8,BPTF
gene_set_query	29	ZNF197	110.8	ARCHS4 Coexpression,258;Enrichr Queries,5;ReMap ChIP-seq,46;GTEx Coexpression,134	SPEN,SMAD4,ZZZ3,KMT2A,SETBP1,ZNF507,ZNF83,ASH1L,ZNF8,ARID2,CXXC4,BPTF
gene_set_query	30	ZNF727	114	ARCHS4 Coexpression,227;GTEx Coexpression,1	MECP2,SMAD4,REST,KMT2A,SETBP1,ZNF83,XPA,ZBTB10,SMAD9,ASH1L
gene_set_query	31	ZFHX3	115.3	ARCHS4 Coexpression,62;Enrichr Queries,196;GTEx Coexpression,88	SPEN,SETBP1,KMT2A,ZBTB10,SMAD9,TCF20,ASH1L
gene_set_query	32	ZNF782	115.7	ARCHS4 Coexpression,45;Enrichr Queries,102;GTEx Coexpression,200	KMT2A,SETDB1,SETBP1,ZNF83,ZNF507,ASH1L,BPTF
gene_set_query	33	ZSCAN12	118.3	ARCHS4 Coexpression,93;Enrichr Queries,226;GTEx Coexpression,36	ZZZ3,KMT2A,SETDB1,ZNF507,RFX7,PRDM1,ZNF8,ARID2,BPTF
gene_set_query	34	ZNF268	122.3	ARCHS4 Coexpression,127;Enrichr Queries,95;GTEx Coexpression,145	REST,ZZZ3,ZNF83,RFX7,PRDM5,ZNF8,BPTF
gene_set_query	35	ZNF292	127.7	ARCHS4 Coexpression,172;Enrichr Queries,19;GTEx Coexpression,192	SPEN,KMT2A,RFX7,ZBTB10,TCF4,ASH1L,ARID2,BPTF
gene_set_query	36	ZNF445	129	ARCHS4 Coexpression,348;Enrichr Queries,9;GTEx Coexpression,30	MECP2,SPEN,KMT2A,ZNF83,ZNF507,RFX7,ZBTB10,NRF1,ASH1L,ARID2,ZNF8,BPTF
gene_set_query	37	GABPA	130.8	Literature ChIP-seq,55;ARCHS4 Coexpression,306;ENCODE ChIP-seq,99;Enrichr Queries,118;ReMap ChIP-seq,195;GTEx Coexpression,12	ZNF584,SMAD4,REST,ZZZ3,SETDB1,SETBP1,ZNF507,TCF4,ARID2,ESR1,BPTF
gene_set_query	38	ZNF561	131.3	ARCHS4 Coexpression,125;Enrichr Queries,96;GTEx Coexpression,173	REST,KMT2A,ZNF507,RFX7,PRDM1,ZNF8,ARID2,TP63
gene_set_query	39	ZNF418	136	ARCHS4 Coexpression,206;Enrichr Queries,93;GTEx Coexpression,109	KMT2A,SETBP1,ZNF83,TCF4,PRDM1,ASH1L,BPTF
gene_set_query	40	ZNF236	136.3	ARCHS4 Coexpression,15;Enrichr Queries,1;GTEx Coexpression,393	SPEN,SMAD4,ZZZ3,KMT2A,SETBP1,RFX7,TCF20,ASH1L,ARID2,BPTF
gene_set_query	41	ZNF33A	136.3	ARCHS4 Coexpression,84;Enrichr Queries,12;GTEx Coexpression,313	SMAD4,KMT2A,ZNF83,ZNF507,RFX7,ASH1L,ARID2,BPTF
gene_set_query	42	ZNF654	137.7	ARCHS4 Coexpression,66;Enrichr Queries,176;GTEx Coexpression,171	REST,ZZZ3,RFX7,ZBTB10,BPTF
gene_set_query	43	VEZF1	138	ARCHS4 Coexpression,19;Enrichr Queries,140;GTEx Coexpression,255	SMAD4,SETBP1,KMT2A,RFX7,ARID2,CXXC4,BPTF
gene_set_query	44	CLOCK	139	Literature ChIP-seq,147;ARCHS4 Coexpression,43;Enrichr Queries,88;ReMap ChIP-seq,252;GTEx Coexpression,165	REST,KMT2A,ZNF507,ASH1L,ARID2,BPTF
gene_set_query	45	BAZ2A	139.3	ARCHS4 Coexpression,152;Enrichr Queries,86;GTEx Coexpression,180	SPEN,SETDB1,KMT2A,TCF20,ASH1L,ARID2,BPTF
gene_set_query	46	TOPORS	153	ARCHS4 Coexpression,235;GTEx Coexpression,71	REST,SETDB1,ARID2
gene_set_query	47	ZBTB8A	156	ARCHS4 Coexpression,277;GTEx Coexpression,35	SMAD4,SETBP1,ZBTB10,ASH1L,ZNF8
gene_set_query	48	ZNF518A	157.7	ARCHS4 Coexpression,95;Enrichr Queries,58;GTEx Coexpression,320	ZZZ3,KMT2A,ZNF83,RFX7,ARID2,BPTF
gene_set_query	49	ZNF827	157.7	ARCHS4 Coexpression,35;Enrichr Queries,341;GTEx Coexpression,97	KMT2A,SETBP1,ZNF83,SMAD9,TCF4,CXXC4,BPTF
gene_set_query	50	ZNF134	165	ARCHS4 Coexpression,40;Enrichr Queries,337;GTEx Coexpression,118	ZNF584,RFX7,ZNF83,TCF4,ASH1L,BPTF
gene_set_query	51	TSHZ1	165.7	ARCHS4 Coexpression,94;Enrichr Queries,378;GTEx Coexpression,25	MECP2,SPEN,KMT2A,SETBP1,TCF4,ASH1L,PRDM1,BPTF
gene_set_query	52	IKZF4	169.3	ARCHS4 Coexpression,183;Enrichr Queries,201;GTEx Coexpression,124	MECP2,KMT2A,SETBP1,ZNF507,ASH1L,PRDM1,CXXC4,BPTF
gene_set_query	53	ZNF740	169.8	ARCHS4 Coexpression,426;Enrichr Queries,209;ReMap ChIP-seq,6;GTEx Coexpression,38	MECP2,SPEN,SMAD4,KMT2A,RFX7,TCF20,ARID2,BPTF
gene_set_query	54	ZZZ3	172	ARCHS4 Coexpression,195;ENCODE ChIP-seq,13;Enrichr Queries,225;ReMap ChIP-seq,39;GTEx Coexpression,388	REST,KMT2A,ASH1L,ARID2,ESR1,CXXC4,BPTF
gene_set_query	55	ZNF543	172.3	ARCHS4 Coexpression,190;Enrichr Queries,108;GTEx Coexpression,219	ZNF584,RFX7,ZNF83,ZNF507,PRDM1,ZNF8
gene_set_query	56	ZNF280C	172.7	ARCHS4 Coexpression,244;Enrichr Queries,121;GTEx Coexpression,153	ZNF507,RFX7,ZBTB10,ARID2,BPTF
gene_set_query	57	ZBTB37	172.7	ARCHS4 Coexpression,22;Enrichr Queries,7;GTEx Coexpression,489	SPEN,REST,SETDB1,KMT2A,ZBTB10,PRDM1,ASH1L,ARID2,ZNF8,BPTF
gene_set_query	58	ZNF37A	175.3	ARCHS4 Coexpression,136;Enrichr Queries,132;GTEx Coexpression,258	KMT2A,ZNF83,RFX7,PRDM5,ARID2,ZNF8,BPTF
gene_set_query	59	SP4	176.4	ARCHS4 Coexpression,452;ENCODE ChIP-seq,85;Enrichr Queries,34;ReMap ChIP-seq,180;GTEx Coexpression,131	ZNF584,SMAD4,SETDB1,ZBTB10,NRF1,ASH1L,PRDM1,CXXC4,ZNF507,RFX7,ARID2,BPTF
gene_set_query	60	ZNF573	179.3	ARCHS4 Coexpression,290;Enrichr Queries,157;GTEx Coexpression,91	ZZZ3,KMT2A,ZNF507,RFX7,ZNF83,ZNF8,BPTF
gene_set_query	61	SMAD1	179.4	Literature ChIP-seq,103;ARCHS4 Coexpression,328;Enrichr Queries,175;ReMap ChIP-seq,231;GTEx Coexpression,60	SPEN,SMAD4,ZZZ3,ZNF507,RFX7,TCF4,ASH1L,PRDM1,ESR1
gene_set_query	62	ZNF264	179.7	ARCHS4 Coexpression,342;Enrichr Queries,21;GTEx Coexpression,176	MECP2,REST,SMAD4,SETDB1,KMT2A,ZNF507,ZBTB10,ASH1L,ZNF8
gene_set_query	63	ZNF624	181.3	ARCHS4 Coexpression,89;Enrichr Queries,304;GTEx Coexpression,151	REST,ZZZ3,SETBP1,PRDM5,TCF4,PRDM1
gene_set_query	64	SON	182	ARCHS4 Coexpression,30;GTEx Coexpression,334	SPEN,SMAD4,KMT2A,TCF20,BPTF
gene_set_query	65	ZNF141	185.3	ARCHS4 Coexpression,205;Enrichr Queries,80;GTEx Coexpression,271	KMT2A,SETBP1,ZNF83,ZNF507,ZBTB10,ZNF8,BPTF
gene_set_query	66	ZNF248	185.7	ARCHS4 Coexpression,150;Enrichr Queries,174;GTEx Coexpression,233	KMT2A,SETBP1,ZNF83,TCF4,CXXC4
gene_set_query	67	ZNF662	186.7	ARCHS4 Coexpression,242;Enrichr Queries,271;GTEx Coexpression,47	SMAD4,KMT2A,ZNF83,SMAD9,ZNF8,ESR1,BPTF
gene_set_query	68	ZNF510	188.7	ARCHS4 Coexpression,16;Enrichr Queries,2;GTEx Coexpression,548	SMAD4,KMT2A,ZNF507,RFX7,ZBTB10,TCF20,ASH1L,ARID2,BPTF
gene_set_query	69	NR2C2	190.6	ARCHS4 Coexpression,59;ENCODE ChIP-seq,100;Enrichr Queries,20;ReMap ChIP-seq,174;GTEx Coexpression,600	ZNF584,SPEN,SMAD4,REST,SETDB1,KMT2A,TCF20,ASH1L,ARID2,BPTF
gene_set_query	70	YY1	191.3	Literature ChIP-seq,35;ARCHS4 Coexpression,665;ENCODE ChIP-seq,1;Enrichr Queries,236;ReMap ChIP-seq,202;GTEx Coexpression,9	SPEN,SMAD4,KMT2A,SETDB1,XPA,SMAD9,TCF20,ASH1L,NRF1,ZNF8,MECP2,ZZZ3,ZNF507,TCF4,ARID2,BPTF
gene_set_query	71	ZNF532	192	ARCHS4 Coexpression,161;Enrichr Queries,364;GTEx Coexpression,51	MECP2,KMT2A,SETBP1,ZBTB10,TCF4,ASH1L,PRDM1,BPTF
gene_set_query	72	ZNF594	194.3	ARCHS4 Coexpression,200;Enrichr Queries,142;GTEx Coexpression,241	KMT2A,ZNF83,ZNF507,ZNF8,BPTF
gene_set_query	73	GATAD2B	194.7	ARCHS4 Coexpression,1;Enrichr Queries,53;GTEx Coexpression,530	MECP2,SPEN,KMT2A,RFX7,TCF20,NRF1,ASH1L,ARID2,BPTF
gene_set_query	74	ZNF311	195.3	ARCHS4 Coexpression,198;Enrichr Queries,246;GTEx Coexpression,142	REST,ZZZ3,TCF4,PRDM1,ESR1
gene_set_query	75	CTCF	197.2	Literature ChIP-seq,105;ARCHS4 Coexpression,175;ENCODE ChIP-seq,4;Enrichr Queries,32;ReMap ChIP-seq,206;GTEx Coexpression,661	SMAD4,KMT2A,SETDB1,TCF20,ASH1L,NRF1,PRDM1,ESR1,ZZZ3,SETBP1,RFX7,ZNF83,ZNF507,ARID2,BPTF
gene_set_query	76	ZNF84	200	ARCHS4 Coexpression,124;Enrichr Queries,11;GTEx Coexpression,465	SMAD4,ZZZ3,KMT2A,ZNF83,RFX7,TCF4,ARID2,BPTF
gene_set_query	77	FOXP2	201.5	Literature ChIP-seq,82;ARCHS4 Coexpression,526;ENCODE ChIP-seq,68;Enrichr Queries,180;ReMap ChIP-seq,232;GTEx Coexpression,121	SMAD4,SETBP1,XPA,TCF4,PRDM1,ESR1,CXXC4
gene_set_query	78	ZNF527	203	ARCHS4 Coexpression,240;Enrichr Queries,101;GTEx Coexpression,268	SMAD4,SETBP1,ZNF507,ZNF83,ZBTB10,ZNF8
gene_set_query	79	ZNF844	204.5	ARCHS4 Coexpression,377;GTEx Coexpression,32	SPEN,SMAD4,ZNF507,ZBTB10,ASH1L,ZNF8
gene_set_query	80	ZNF660	204.7	ARCHS4 Coexpression,186;Enrichr Queries,410;GTEx Coexpression,18	MECP2,KMT2A,SETBP1,ZNF83,PRDM5,ZBTB10,ZNF8,ARID2,BPTF
gene_set_query	81	ZNF397	205.5	ARCHS4 Coexpression,401;GTEx Coexpression,10	SPEN,SMAD4,ZZZ3,ZNF507,PRDM5,ASH1L,ZNF8
gene_set_query	82	ZNF609	207.7	ARCHS4 Coexpression,27;Enrichr Queries,85;GTEx Coexpression,511	SPEN,KMT2A,RFX7,TCF20,ASH1L,ARID2,BPTF
gene_set_query	83	SRCAP	209.3	ARCHS4 Coexpression,157;Enrichr Queries,89;GTEx Coexpression,382	SPEN,SETDB1,KMT2A,RFX7,TCF20,ASH1L,BPTF
gene_set_query	84	ZBTB26	211	ARCHS4 Coexpression,399;Enrichr Queries,79;GTEx Coexpression,155	SMAD4,ZZZ3,SETBP1,ZNF507,RFX7,ZBTB10,ARID2
gene_set_query	85	ZBTB44	214	ARCHS4 Coexpression,56;Enrichr Queries,84;GTEx Coexpression,502	SMAD4,KMT2A,ZNF507,RFX7,ZBTB10,ASH1L,ARID2,BPTF
gene_set_query	86	ESR2	214.2	Literature ChIP-seq,148;ARCHS4 Coexpression,208;Enrichr Queries,106;ReMap ChIP-seq,286;GTEx Coexpression,323	SMAD4,SETDB1,PRDM1,ESR1,TP63
gene_set_query	87	ZNF675	215.3	ARCHS4 Coexpression,324;Enrichr Queries,135;GTEx Coexpression,187	ZNF83,ZNF507,TCF20,PRDM1,ZNF8,TP63,BPTF
gene_set_query	88	ZNF250	215.7	ARCHS4 Coexpression,443;Enrichr Queries,188;GTEx Coexpression,16	MECP2,SPEN,KMT2A,SETBP1,ZBTB10,NRF1,ZNF8,BPTF
gene_set_query	89	KMT2B	216	ARCHS4 Coexpression,389;ReMap ChIP-seq,43	ZNF584,KMT2A,TCF20
gene_set_query	90	ZNF639	216.8	ARCHS4 Coexpression,375;Enrichr Queries,459;ReMap ChIP-seq,20;GTEx Coexpression,13	SPEN,SMAD4,ZZZ3,SETBP1,RFX7,XPA,ZBTB10,SMAD9,ARID2,ZNF8
gene_set_query	91	TFAP2C	217	Literature ChIP-seq,67;ARCHS4 Coexpression,26;ENCODE ChIP-seq,53;Enrichr Queries,357;ReMap ChIP-seq,239;GTEx Coexpression,560	SMAD4,ZZZ3,SETDB1,ZNF507,ZBTB10,PRDM1,ARID2,ESR1,TP63
gene_set_query	92	HOXD10	217.7	ARCHS4 Coexpression,224;Enrichr Queries,339;GTEx Coexpression,90	SPEN,SETBP1,ZNF83,PRDM1,ESR1
gene_set_query	93	ZNF142	219	ARCHS4 Coexpression,126;Enrichr Queries,468;GTEx Coexpression,63	MECP2,SPEN,KMT2A,TCF20,NRF1,ASH1L
gene_set_query	94	TRPS1	222	ARCHS4 Coexpression,88;Enrichr Queries,409;GTEx Coexpression,169	SETBP1,PRDM1,ASH1L,ESR1,TP63
gene_set_query	95	ZNF766	222.3	ARCHS4 Coexpression,359;Enrichr Queries,233;ReMap ChIP-seq,38;GTEx Coexpression,259	SETDB1,SETBP1,ZNF83,MYOD1,ZBTB10,ARID2,ZNF8,BPTF
gene_set_query	96	RBAK	222.3	ARCHS4 Coexpression,75;Enrichr Queries,37;GTEx Coexpression,555	SMAD4,ZZZ3,KMT2A,RFX7,ZBTB10,TCF20,ARID2,BPTF
gene_set_query	97	ZNF398	224	ARCHS4 Coexpression,61;Enrichr Queries,491;GTEx Coexpression,120	SPEN,SETDB1,KMT2A,TCF20,ARID2,BPTF
gene_set_query	98	TCF12	225.4	ARCHS4 Coexpression,396;ENCODE ChIP-seq,67;Enrichr Queries,129;ReMap ChIP-seq,248;GTEx Coexpression,287	SMAD4,ZZZ3,KMT2A,RFX7,PRDM5,TCF4,ARID2,BPTF
gene_set_query	99	PRR12	226	ARCHS4 Coexpression,367;Enrichr Queries,215;GTEx Coexpression,96	SPEN,KMT2A,TCF20,BPTF
gene_set_query	100	MYSM1	226	ARCHS4 Coexpression,14;Enrichr Queries,66;GTEx Coexpression,598	SPEN,SMAD4,ZZZ3,KMT2A,RFX7,TCF20,ASH1L,BPTF
gene_set_query	101	ZNF785	226.5	ARCHS4 Coexpression,229;GTEx Coexpression,224	KMT2A,ZNF83,ZNF8
gene_set_query	102	TCF7L2	227.2	Literature ChIP-seq,59;ARCHS4 Coexpression,82;ENCODE ChIP-seq,12;Enrichr Queries,698;ReMap ChIP-seq,177;GTEx Coexpression,335	SPEN,REST,SETBP1,KMT2A,ZBTB10,TCF20,TCF4,PRDM1,ASH1L,ARID2,BPTF
gene_set_query	103	SP1	228	ARCHS4 Coexpression,566;ENCODE ChIP-seq,49;Enrichr Queries,71;ReMap ChIP-seq,208;GTEx Coexpression,246	MECP2,REST,SMAD4,SETDB1,KMT2A,TCF20,ARID2,ZNF8,ESR1
gene_set_query	104	ZNF585A	228.7	ARCHS4 Coexpression,109;Enrichr Queries,330;GTEx Coexpression,247	ZNF83,PRDM5,ZBTB10,ASH1L,ZNF8,BPTF
gene_set_query	105	KDM2A	229	ARCHS4 Coexpression,344;GTEx Coexpression,114	SETDB1,TCF20,ARID2
gene_set_query	106	ZNF841	229.3	ARCHS4 Coexpression,104;Enrichr Queries,383;GTEx Coexpression,201	KMT2A,ZNF83,ASH1L,ZNF8
gene_set_query	107	ZNF354B	230	ARCHS4 Coexpression,147;Enrichr Queries,335;GTEx Coexpression,208	SMAD4,KMT2A,ZNF83,ZBTB10,TCF20,ASH1L
gene_set_query	108	BCL11A	232	ARCHS4 Coexpression,131;ENCODE ChIP-seq,2;Enrichr Queries,403;ReMap ChIP-seq,30;GTEx Coexpression,594	SPEN,REST,SETBP1,TCF4,PRDM1,ARID2,CXXC4,TP63
gene_set_query	109	ZNF704	232.3	ARCHS4 Coexpression,18;Enrichr Queries,630;GTEx Coexpression,49	MECP2,KMT2A,SETBP1,ZBTB10,TCF4,ASH1L,BPTF
gene_set_query	110	REST	234.8	Literature ChIP-seq,52;ARCHS4 Coexpression,72;ENCODE ChIP-seq,20;Enrichr Queries,13;ReMap ChIP-seq,213;GTEx Coexpression,1039	SMAD4,KMT2A,ZBTB10,TCF20,PRDM1,ASH1L,NRF1,ESR1,REST,RFX7,MYOD1,ARID2,BPTF
gene_set_query	111	ZNF136	237.7	ARCHS4 Coexpression,536;Enrichr Queries,162;GTEx Coexpression,15	SPEN,SMAD4,KMT2A,SETDB1,SETBP1,ZNF83,ZBTB10,ZNF8,BPTF
gene_set_query	112	FOXO1	239.6	Literature ChIP-seq,99;ARCHS4 Coexpression,365;Enrichr Queries,372;ReMap ChIP-seq,126;GTEx Coexpression,236	SMAD4,ZNF507,XPA,PRDM1,ESR1,BPTF
gene_set_query	113	SETDB1	241	Literature ChIP-seq,102;ARCHS4 Coexpression,668;ENCODE ChIP-seq,104;Enrichr Queries,65;ReMap ChIP-seq,59;GTEx Coexpression,448	ZNF584,SPEN,SMAD4,KMT2A,RFX7,MYOD1,TCF20,ASH1L,ARID2,ZNF8,BPTF
gene_set_query	114	PRDM15	241.7	ARCHS4 Coexpression,370;Enrichr Queries,138;GTEx Coexpression,217	SPEN,SETDB1,KMT2A,SETBP1,RFX7,ZNF8,BPTF
gene_set_query	115	TET1	243.3	Literature ChIP-seq,98;ARCHS4 Coexpression,419;GTEx Coexpression,213	SMAD4,ZZZ3,SMAD9,PRDM1,BPTF
gene_set_query	116	ZNF791	245.3	ARCHS4 Coexpression,364;Enrichr Queries,100;GTEx Coexpression,272	SPEN,SMAD4,KMT2A,ASH1L,ARID2,ZNF8,BPTF
gene_set_query	117	ZNF217	246	Literature ChIP-seq,1;ARCHS4 Coexpression,171;ENCODE ChIP-seq,60;Enrichr Queries,614;ReMap ChIP-seq,40;GTEx Coexpression,590	REST,SETDB1,SETBP1,ZNF507,ZBTB10,TCF20,PRDM1,ARID2,ESR1,TP63,BPTF
gene_set_query	118	PBX1	248	Literature ChIP-seq,83;ARCHS4 Coexpression,166;Enrichr Queries,651;GTEx Coexpression,92	MECP2,SMAD4,SETBP1,RFX7,ZBTB10,ZNF8,ESR1,CXXC4,BPTF
gene_set_query	119	ATF2	248.4	ARCHS4 Coexpression,117;ENCODE ChIP-seq,69;Enrichr Queries,24;ReMap ChIP-seq,173;GTEx Coexpression,859	SPEN,SMAD4,REST,ZZZ3,KMT2A,SETDB1,TCF4,ASH1L,ARID2,ESR1,CXXC4,BPTF
gene_set_query	120	ZNF345	250.7	ARCHS4 Coexpression,362;Enrichr Queries,192;GTEx Coexpression,198	SETDB1,KMT2A,ZNF83,ZNF507,ARID2,ZNF8
gene_set_query	121	ZNF606	251	ARCHS4 Coexpression,335;Enrichr Queries,222;GTEx Coexpression,196	SETBP1,ZNF83,ZBTB10,CXXC4,BPTF
gene_set_query	122	ARNT	252	Literature ChIP-seq,8;ARCHS4 Coexpression,477;Enrichr Queries,30;ReMap ChIP-seq,149;GTEx Coexpression,596	SPEN,SMAD4,KMT2A,SETDB1,MYOD1,ASH1L,PRDM1,ARID2,ESR1,TP63
gene_set_query	123	ZNF773	252	ARCHS4 Coexpression,141;Enrichr Queries,498;GTEx Coexpression,117	ZNF584,ZZZ3,RFX7,ZNF83,PRDM5,ZNF8
gene_set_query	124	ZNF621	252.7	ARCHS4 Coexpression,142;Enrichr Queries,137;GTEx Coexpression,479	ZZZ3,KMT2A,ZNF83,RFX7,PRDM5,ARID2,ZNF8
gene_set_query	125	AEBP2	253.3	ARCHS4 Coexpression,204;Enrichr Queries,165;GTEx Coexpression,391	SETBP1,ZBTB10,ARID2,BPTF
gene_set_query	126	ZNF407	254	ARCHS4 Coexpression,8;Enrichr Queries,40;GTEx Coexpression,714	SPEN,KMT2A,SETBP1,TCF20,ASH1L,BPTF
gene_set_query	127	XPA	254.3	ARCHS4 Coexpression,540;Enrichr Queries,112;GTEx Coexpression,111	SMAD4,SETBP1,SMAD9,TCF20,PRDM1,ESR1
gene_set_query	128	ZNF100	254.3	ARCHS4 Coexpression,264;Enrichr Queries,308;GTEx Coexpression,191	SETDB1,ZNF83,ZNF507,ARID2,ZNF8
gene_set_query	129	ZNF181	254.3	ARCHS4 Coexpression,36;Enrichr Queries,91;GTEx Coexpression,636	ZZZ3,ZNF507,ZNF83,ZBTB10,TCF4,ASH1L
gene_set_query	130	ZNF559	256.7	ARCHS4 Coexpression,605;Enrichr Queries,60;GTEx Coexpression,105	SMAD4,SETBP1,ZNF83,RFX7,PRDM5,TCF4,ASH1L
gene_set_query	131	ZNF558	257	ARCHS4 Coexpression,139;Enrichr Queries,392;GTEx Coexpression,240	SMAD4,SETBP1,ZNF83,ASH1L,ZNF8
gene_set_query	132	RFX7	258	ARCHS4 Coexpression,7;Enrichr Queries,74;GTEx Coexpression,693	SPEN,SMAD4,KMT2A,ZNF507,TCF20,ASH1L,ARID2,TP63,BPTF
gene_set_query	133	ZNF254	260	ARCHS4 Coexpression,231;Enrichr Queries,61;GTEx Coexpression,488	ZNF83,ZNF507,ZBTB10,ARID2,BPTF
gene_set_query	134	RLF	262.7	ARCHS4 Coexpression,9;Enrichr Queries,141;GTEx Coexpression,638	SPEN,ZZZ3,ZBTB10,ASH1L,ARID2,BPTF
gene_set_query	135	ELF2	265.7	ARCHS4 Coexpression,449;Enrichr Queries,127;GTEx Coexpression,221	SMAD4,ASH1L,ARID2,ZNF8,BPTF
gene_set_query	136	NFIA	266	ARCHS4 Coexpression,54;Enrichr Queries,700;GTEx Coexpression,44	SETBP1,XPA,ZBTB10,SMAD9,TCF4,ARID2,BPTF
gene_set_query	137	ZBTB11	266	ARCHS4 Coexpression,133;Enrichr Queries,231;ReMap ChIP-seq,114;GTEx Coexpression,586	ZZZ3,RFX7,ZBTB10,ASH1L,BPTF
gene_set_query	138	AR	267	Literature ChIP-seq,12;ARCHS4 Coexpression,250;Enrichr Queries,604;ReMap ChIP-seq,137;GTEx Coexpression,332	SMAD4,KMT2A,SETBP1,ZBTB10,TCF20,PRDM1,ESR1,TP63
gene_set_query	139	ZNF506	267.7	ARCHS4 Coexpression,433;Enrichr Queries,195;GTEx Coexpression,175	KMT2A,SETBP1,ZNF83,ZBTB10,ZNF8
gene_set_query	140	CREBZF	269.3	ARCHS4 Coexpression,514;Enrichr Queries,241;GTEx Coexpression,53	SPEN,SMAD4,KMT2A,ZNF83,TCF20,BPTF
gene_set_query	141	ZNF354C	269.7	ARCHS4 Coexpression,336;Enrichr Queries,428;GTEx Coexpression,45	SMAD4,ZZZ3,ZNF507,SMAD9,ASH1L,ESR1
gene_set_query	142	ZBTB39	271.3	ARCHS4 Coexpression,503;Enrichr Queries,45;GTEx Coexpression,266	MECP2,SPEN,SETDB1,KMT2A,ZBTB10,TCF20,ARID2,BPTF
gene_set_query	143	ZNF567	273	ARCHS4 Coexpression,563;Enrichr Queries,94;GTEx Coexpression,162	ZZZ3,ZNF507,ZNF83,ARID2,ZNF8,BPTF
gene_set_query	144	ZNF43	275.3	ARCHS4 Coexpression,225;Enrichr Queries,155;GTEx Coexpression,446	SETDB1,ZNF83,RFX7,ZNF8,BPTF
gene_set_query	145	ZNF525	275.5	ARCHS4 Coexpression,357;GTEx Coexpression,194	SETDB1,ARID2,ZNF8
gene_set_query	146	ZNF10	278.3	ARCHS4 Coexpression,102;Enrichr Queries,361;GTEx Coexpression,372	ZNF83,PRDM5,ZBTB10,CXXC4
gene_set_query	147	ZNF224	278.3	ARCHS4 Coexpression,48;Enrichr Queries,186;GTEx Coexpression,601	SETDB1,KMT2A,ZNF83,PRDM5,TCF4,ZNF8,BPTF
gene_set_query	148	HIVEP1	279.7	ARCHS4 Coexpression,13;Enrichr Queries,113;GTEx Coexpression,713	SPEN,KMT2A,TCF20,PRDM1,ASH1L,BPTF
gene_set_query	149	ZNF286B	280	ARCHS4 Coexpression,42;GTEx Coexpression,518	KMT2A,TCF4,ZNF8,ARID2
gene_set_query	150	HOXD13	280.3	Literature ChIP-seq,64;ARCHS4 Coexpression,531;Enrichr Queries,264;GTEx Coexpression,262	SPEN,SETBP1,PRDM1,ARID2,ESR1
gene_set_query	151	ZXDB	282.3	ARCHS4 Coexpression,232;Enrichr Queries,445;GTEx Coexpression,170	ZNF584,ZZZ3,ZBTB10,TCF20,PRDM1
gene_set_query	152	GRHL2	283.4	Literature ChIP-seq,49;ARCHS4 Coexpression,164;Enrichr Queries,420;ReMap ChIP-seq,242;GTEx Coexpression,542	ZNF83,TCF4,PRDM1,ESR1,CXXC4,TP63
gene_set_query	153	L3MBTL4	284	ARCHS4 Coexpression,283;GTEx Coexpression,285	ARID2,ZNF8,TP63
gene_set_query	154	TFCP2	285	ARCHS4 Coexpression,179;Enrichr Queries,235;GTEx Coexpression,441	SPEN,SMAD4,ZZZ3,RFX7,BPTF
gene_set_query	155	NR3C1	286.2	Literature ChIP-seq,96;ARCHS4 Coexpression,789;ENCODE ChIP-seq,3;Enrichr Queries,343;ReMap ChIP-seq,82;GTEx Coexpression,404	ZNF584,ZZZ3,SETBP1,ZNF507,XPA,PRDM1,NRF1,ARID2,ESR1,CXXC4,TP63,BPTF
gene_set_query	156	GATA3	286.3	Literature ChIP-seq,112;ARCHS4 Coexpression,553;ENCODE ChIP-seq,17;Enrichr Queries,345;ReMap ChIP-seq,68;GTEx Coexpression,623	KMT2A,ZNF507,ZBTB10,XPA,TCF20,PRDM1,ASH1L,ARID2,ESR1,TP63
gene_set_query	157	PGR	288.3	ARCHS4 Coexpression,332;Enrichr Queries,663;ReMap ChIP-seq,77;GTEx Coexpression,81	SETBP1,PRDM5,PRDM1,ESR1
gene_set_query	158	THAP6	289.3	ARCHS4 Coexpression,390;Enrichr Queries,419;GTEx Coexpression,59	SMAD4,REST,SETDB1,ZNF507,ZBTB10,ZNF8,BPTF
gene_set_query	159	ELK4	293.6	ARCHS4 Coexpression,118;ENCODE ChIP-seq,93;Enrichr Queries,36;ReMap ChIP-seq,118;GTEx Coexpression,1103	ZNF584,SPEN,REST,KMT2A,SETDB1,TCF20,ASH1L,ARID2,BPTF
gene_set_query	160	ZNF780B	294	ARCHS4 Coexpression,312;Enrichr Queries,232;GTEx Coexpression,338	KMT2A,ZNF83,ZNF507,ZNF8
gene_set_query	161	ZBTB24	295	ARCHS4 Coexpression,74;Enrichr Queries,369;GTEx Coexpression,442	REST,RFX7,ZBTB10,TCF20,PRDM1
gene_set_query	162	SP3	296.7	ARCHS4 Coexpression,363;Enrichr Queries,116;GTEx Coexpression,411	REST,SMAD4,TCF20,PRDM1,ARID2,BPTF
gene_set_query	163	ZBTB40	297	ARCHS4 Coexpression,169;Enrichr Queries,111;GTEx Coexpression,611	SPEN,SMAD4,KMT2A,TCF20,PRDM1,ASH1L
gene_set_query	164	HOXA6	297.7	ARCHS4 Coexpression,347;Enrichr Queries,295;GTEx Coexpression,251	SPEN,ZZZ3,PRDM1,CXXC4,ESR1
gene_set_query	165	CUX1	298	Literature ChIP-seq,90;ARCHS4 Coexpression,871;ENCODE ChIP-seq,94;Enrichr Queries,463;ReMap ChIP-seq,140;GTEx Coexpression,130	MECP2,SPEN,SMAD4,SETDB1,ZNF507,SMAD9,TCF4,PRDM1,ZNF8,ESR1,BPTF
gene_set_query	166	ZNF568	299.3	ARCHS4 Coexpression,488;Enrichr Queries,185;GTEx Coexpression,225	KMT2A,SETBP1,ZNF83,ZBTB10,ASH1L,ZNF8
gene_set_query	167	ZNF587B	301	ARCHS4 Coexpression,80;GTEx Coexpression,522	SETDB1,ARID2,BPTF
gene_set_query	168	ZKSCAN2	301.3	ARCHS4 Coexpression,498;Enrichr Queries,52;GTEx Coexpression,354	KMT2A,SETBP1,ZNF507,RFX7,ZBTB10,ARID2,CXXC4,BPTF
gene_set_query	169	AHCTF1	302.3	ARCHS4 Coexpression,441;Enrichr Queries,82;GTEx Coexpression,384	SPEN,KMT2A,TCF20,ASH1L,ARID2,BPTF
gene_set_query	170	ZKSCAN1	302.4	ARCHS4 Coexpression,60;ENCODE ChIP-seq,36;Enrichr Queries,216;ReMap ChIP-seq,171;GTEx Coexpression,1029	ZNF584,KMT2A,SETDB1,ZNF83,TCF20,TCF4,ASH1L,PRDM1,CXXC4,BPTF
gene_set_query	171	ZNF343	305	ARCHS4 Coexpression,613;Enrichr Queries,240;GTEx Coexpression,62	SPEN,SMAD4,ZZZ3,SETBP1,SETDB1,ZNF83,PRDM1,ZNF8
gene_set_query	172	TFAP2A	305.2	Literature ChIP-seq,123;ARCHS4 Coexpression,505;ENCODE ChIP-seq,30;Enrichr Queries,377;ReMap ChIP-seq,267;GTEx Coexpression,529	REST,SMAD4,ZZZ3,KMT2A,SETBP1,ZNF507,ZNF83,PRDM1,ESR1,TP63
gene_set_query	173	PLAGL2	305.3	ARCHS4 Coexpression,165;Enrichr Queries,509;GTEx Coexpression,242	SPEN,KMT2A,TCF20,PRDM1,ARID2
gene_set_query	174	HOXA2	313.3	Literature ChIP-seq,162;ARCHS4 Coexpression,130;Enrichr Queries,634;GTEx Coexpression,327	SPEN,SETBP1,RFX7,PRDM1
gene_set_query	175	NCOA1	315.5	ARCHS4 Coexpression,755;Enrichr Queries,49;ReMap ChIP-seq,24;GTEx Coexpression,434	SMAD4,KMT2A,SETDB1,SETBP1,ASH1L,ESR1,BPTF
gene_set_query	176	PURB	318.5	ARCHS4 Coexpression,508;GTEx Coexpression,129	KMT2A,TCF20,ASH1L,BPTF
gene_set_query	177	ZNF154	319.3	ARCHS4 Coexpression,400;Enrichr Queries,474;GTEx Coexpression,84	MECP2,SETBP1,ZNF83,SMAD9,ZNF8,CXXC4
gene_set_query	178	JRK	320.5	ARCHS4 Coexpression,159;GTEx Coexpression,482	SPEN,SETDB1,TCF20
gene_set_query	179	ZNF605	321.3	ARCHS4 Coexpression,425;Enrichr Queries,200;GTEx Coexpression,339	ZNF83,RFX7,ZNF8,BPTF
gene_set_query	180	ZNF649	321.3	ARCHS4 Coexpression,234;Enrichr Queries,684;GTEx Coexpression,46	ZNF584,ZZZ3,SETBP1,ZNF83,ASH1L,ARID2
gene_set_query	181	ISL1	321.7	ARCHS4 Coexpression,557;Enrichr Queries,329;GTEx Coexpression,79	SETBP1,ZNF83,PRDM1,ESR1,CXXC4
gene_set_query	182	WT1	321.8	Literature ChIP-seq,6;ARCHS4 Coexpression,418;Enrichr Queries,376;GTEx Coexpression,487	SPEN,SMAD4,SETBP1,RFX7,PRDM5,XPA,TCF20,TCF4,PRDM1,ESR1,CXXC4
gene_set_query	183	HOXA9	323.5	ARCHS4 Coexpression,261;Enrichr Queries,299;ReMap ChIP-seq,70;GTEx Coexpression,664	SPEN,ZBTB10,PRDM1,ESR1,TP63
gene_set_query	184	ZNF70	324	ARCHS4 Coexpression,267;Enrichr Queries,482;GTEx Coexpression,223	SMAD4,SETBP1,ZNF507,ZNF8,BPTF
gene_set_query	185	ZNF44	324.3	ARCHS4 Coexpression,325;Enrichr Queries,469;GTEx Coexpression,179	SETDB1,KMT2A,ZNF83,ARID2,ZNF8
gene_set_query	186	ZNF347	326.7	ARCHS4 Coexpression,434;Enrichr Queries,520;GTEx Coexpression,26	SPEN,SMAD4,KMT2A,ZNF83,ZBTB10,ZNF8,BPTF
gene_set_query	187	ZNF774	327.3	ARCHS4 Coexpression,266;Enrichr Queries,218;GTEx Coexpression,498	KMT2A,SETBP1,MYOD1,ASH1L,ZNF8
gene_set_query	188	ESR1	328	Literature ChIP-seq,11;ARCHS4 Coexpression,1283;ENCODE ChIP-seq,114;Enrichr Queries,371;ReMap ChIP-seq,122;GTEx Coexpression,67	SMAD4,SETBP1,ZNF83,PRDM5,TCF4,PRDM1,ARID2,ESR1,TP63
gene_set_query	189	ZSCAN30	329.5	ARCHS4 Coexpression,135;GTEx Coexpression,524	ZNF83,PRDM5,ZNF8
gene_set_query	190	ZNF300	330	ARCHS4 Coexpression,121;Enrichr Queries,705;GTEx Coexpression,164	ZNF83,PRDM5,TCF4,CXXC4
gene_set_query	191	SETBP1	330.3	ARCHS4 Coexpression,32;Enrichr Queries,882;GTEx Coexpression,77	SMAD4,KMT2A,ZBTB10,TCF4,ASH1L,PRDM1,CXXC4,BPTF
gene_set_query	192	LCORL	331.3	ARCHS4 Coexpression,202;Enrichr Queries,242;GTEx Coexpression,550	SETBP1,RFX7,ARID2,CXXC4
gene_set_query	193	ZNF592	332	ARCHS4 Coexpression,502;Enrichr Queries,81;ReMap ChIP-seq,292;GTEx Coexpression,453	MECP2,SPEN,KMT2A,TCF20,NRF1,BPTF
gene_set_query	194	ZXDA	332	ARCHS4 Coexpression,696;Enrichr Queries,184;GTEx Coexpression,116	SMAD4,ZZZ3,SETBP1,ZBTB10,ASH1L
gene_set_query	195	ZNF263	332.2	Literature ChIP-seq,158;ARCHS4 Coexpression,695;ENCODE ChIP-seq,61;Enrichr Queries,496;ReMap ChIP-seq,153;GTEx Coexpression,430	ZZZ3,SETDB1,TCF20,PRDM1,ZNF8,BPTF
gene_set_query	196	NFIB	333.5	Literature ChIP-seq,146;ARCHS4 Coexpression,51;Enrichr Queries,687;GTEx Coexpression,450	SETBP1,SMAD9,TCF4,BPTF
gene_set_query	197	KDM5B	334.8	Literature ChIP-seq,40;ARCHS4 Coexpression,644;ENCODE ChIP-seq,97;ReMap ChIP-seq,187;GTEx Coexpression,706	ZNF584,REST,SETDB1,PRDM5,TCF20,NRF1,ASH1L,ARID2,CXXC4,BPTF
gene_set_query	198	EBF1	335.4	ARCHS4 Coexpression,734;ENCODE ChIP-seq,92;Enrichr Queries,325;ReMap ChIP-seq,221;GTEx Coexpression,305	SETBP1,SETDB1,RFX7,TCF4,PRDM1,CXXC4
gene_set_query	199	ZNF530	337.3	ARCHS4 Coexpression,191;Enrichr Queries,683;GTEx Coexpression,138	ZNF584,RFX7,ZNF83,NRF1,ZNF8
gene_set_query	200	DACH1	340.7	Literature ChIP-seq,57;ARCHS4 Coexpression,639;Enrichr Queries,326	ZZZ3,SETBP1,ASH1L,ARID2,CXXC4,BPTF
gene_set_query	201	ZNF383	341.7	ARCHS4 Coexpression,107;Enrichr Queries,464;GTEx Coexpression,454	RFX7,ZNF83,PRDM5,PRDM1,ZNF8
gene_set_query	202	ZNF225	343	ARCHS4 Coexpression,176;GTEx Coexpression,510	ZZZ3,SMAD9,ZNF8
gene_set_query	203	ASCL4	346	ARCHS4 Coexpression,110;Enrichr Queries,278;GTEx Coexpression,650	REST,TCF4,PRDM1,ESR1,TP63
gene_set_query	204	ZSCAN25	347	ARCHS4 Coexpression,579;GTEx Coexpression,115	REST,SETDB1,ARID2,ZNF8
gene_set_query	205	TP73	348	ARCHS4 Coexpression,517;Enrichr Queries,350;GTEx Coexpression,177	TCF20,ESR1,TP63
gene_set_query	206	ZNF808	348.3	ARCHS4 Coexpression,451;Enrichr Queries,104;GTEx Coexpression,490	REST,KMT2A,ZNF83,PRDM1,ZNF8,BPTF
gene_set_query	207	NFYA	348.4	ARCHS4 Coexpression,587;ENCODE ChIP-seq,79;Enrichr Queries,67;ReMap ChIP-seq,120;GTEx Coexpression,889	ZNF584,MECP2,SMAD4,REST,KMT2A,TCF20,ZNF8,ESR1,BPTF
gene_set_query	208	ZNF493	350.3	ARCHS4 Coexpression,378;Enrichr Queries,97;GTEx Coexpression,576	KMT2A,ZNF83,RFX7,ARID2,ZNF8,BPTF
gene_set_query	209	SAFB2	351	ARCHS4 Coexpression,371;GTEx Coexpression,331	SPEN,ZNF83
gene_set_query	210	ZNF562	352	ARCHS4 Coexpression,354;Enrichr Queries,131;GTEx Coexpression,571	KMT2A,ZNF83,PRDM1,ARID2,ZNF8,BPTF
gene_set_query	211	ZNF439	352.3	ARCHS4 Coexpression,382;Enrichr Queries,597;GTEx Coexpression,78	KMT2A,ZNF83,ZNF8,BPTF
gene_set_query	212	TCF23	353.7	ARCHS4 Coexpression,263;Enrichr Queries,658;GTEx Coexpression,140	PRDM5,ZNF8,ESR1
gene_set_query	213	ZNF182	353.7	ARCHS4 Coexpression,455;Enrichr Queries,462;GTEx Coexpression,144	KMT2A,ZNF83,RFX7,ASH1L,BPTF
gene_set_query	214	SNAI2	354	ARCHS4 Coexpression,199;Enrichr Queries,618;ReMap ChIP-seq,251;GTEx Coexpression,348	ZZZ3,PRDM1,TP63
gene_set_query	215	SOX11	357	Literature ChIP-seq,56;ARCHS4 Coexpression,101;Enrichr Queries,1255;ReMap ChIP-seq,62;GTEx Coexpression,311	ZNF584,SPEN,ZNF507,XPA,SMAD9,TCF4,CXXC4
gene_set_query	216	FOXO3	358.8	Literature ChIP-seq,21;ARCHS4 Coexpression,925;Enrichr Queries,432;GTEx Coexpression,57	SPEN,SMAD4,SETBP1,ZNF507,ZBTB10,ASH1L,PRDM1,ESR1
gene_set_query	217	ZNF274	359.7	Literature ChIP-seq,19;ARCHS4 Coexpression,588;ENCODE ChIP-seq,63;Enrichr Queries,1045;ReMap ChIP-seq,48;GTEx Coexpression,395	SETDB1,ZNF83,ZNF507,ASH1L,ZNF8
gene_set_query	218	ZNF430	361.3	ARCHS4 Coexpression,380;Enrichr Queries,577;GTEx Coexpression,127	TCF20,PRDM1,ZNF8,TP63,BPTF
gene_set_query	219	ZNF717	363.7	ARCHS4 Coexpression,268;Enrichr Queries,543;GTEx Coexpression,280	REST,ZZZ3,SETBP1,PRDM5
gene_set_query	220	PRDM10	364	ARCHS4 Coexpression,381;Enrichr Queries,22;GTEx Coexpression,689	SPEN,KMT2A,ZBTB10,TCF20,NRF1,ASH1L,ARID2,BPTF
gene_set_query	221	ZNF528	364.3	ARCHS4 Coexpression,187;Enrichr Queries,800;GTEx Coexpression,106	KMT2A,ZNF83,PRDM5,ZNF8,BPTF
gene_set_query	222	ZNF318	365.3	ARCHS4 Coexpression,148;Enrichr Queries,87;ReMap ChIP-seq,41;GTEx Coexpression,1185	SPEN,KMT2A,RFX7,TCF20,ASH1L,BPTF
gene_set_query	223	GATA1	366.2	Literature ChIP-seq,48;ARCHS4 Coexpression,843;ENCODE ChIP-seq,84;Enrichr Queries,245;ReMap ChIP-seq,31;GTEx Coexpression,946	ZNF584,SPEN,SMAD4,KMT2A,SETDB1,PRDM1,ZNF8,ESR1,MECP2,REST,TCF4,ARID2,BPTF
gene_set_query	224	ZNF431	366.3	ARCHS4 Coexpression,368;Enrichr Queries,78;GTEx Coexpression,653	ZNF83,ZNF507,RFX7,PRDM1,ARID2,ZNF8,BPTF
gene_set_query	225	LMX1B	366.3	ARCHS4 Coexpression,158;Enrichr Queries,309;GTEx Coexpression,632	PRDM1,ZNF8,ESR1,TP63
gene_set_query	226	PITX3	366.7	ARCHS4 Coexpression,483;Enrichr Queries,281;GTEx Coexpression,336	MYOD1,ESR1
gene_set_query	227	ZNF550	366.7	ARCHS4 Coexpression,112;Enrichr Queries,414;GTEx Coexpression,574	KMT2A,RFX7,ZNF83,TCF4,ARID2
gene_set_query	228	ZNF736	367	ARCHS4 Coexpression,659;GTEx Coexpression,75	REST,SETDB1,ARID2,BPTF
gene_set_query	229	ZNF417	367	ARCHS4 Coexpression,492;Enrichr Queries,70;GTEx Coexpression,539	SETDB1,KMT2A,ZNF83,ZNF507,ZNF8,BPTF
gene_set_query	230	ZBED2	367	ARCHS4 Coexpression,151;Enrichr Queries,355;GTEx Coexpression,595	SMAD9,TCF20,PRDM1,TP63
gene_set_query	231	ZNF135	367.7	ARCHS4 Coexpression,177;Enrichr Queries,457;GTEx Coexpression,469	SETBP1,ZNF83,TCF4,BPTF
gene_set_query	232	ZNF283	370.7	ARCHS4 Coexpression,238;Enrichr Queries,402;GTEx Coexpression,472	ZZZ3,ZNF83,ARID2,ZNF8
gene_set_query	233	TET3	371.3	ARCHS4 Coexpression,153;ReMap ChIP-seq,296;GTEx Coexpression,665	SPEN,TCF20,TP63
gene_set_query	234	ZNF500	372	ARCHS4 Coexpression,294;Enrichr Queries,768;GTEx Coexpression,54	MECP2,SMAD4,SETDB1,SETBP1,KMT2A,ZNF8
gene_set_query	235	ZBTB33	372.2	ARCHS4 Coexpression,1353;ENCODE ChIP-seq,62;Enrichr Queries,109;ReMap ChIP-seq,130;GTEx Coexpression,207	ZNF584,MECP2,SMAD4,ZZZ3,SETDB1,RFX7,TCF20,ZNF8,TP63,BPTF
gene_set_query	236	CRX	373.8	Literature ChIP-seq,108;ARCHS4 Coexpression,251;Enrichr Queries,159;GTEx Coexpression,977	MECP2,MYOD1,PRDM1,ZNF8,ESR1
gene_set_query	237	ZNF512	375	ARCHS4 Coexpression,320;Enrichr Queries,782;GTEx Coexpression,23	MECP2,KMT2A,ZNF83,PRDM5,SMAD9,TCF4,ASH1L
gene_set_query	238	LIN54	375	ARCHS4 Coexpression,256;GTEx Coexpression,494	PRDM1,ARID2
gene_set_query	239	ZSCAN29	376	ARCHS4 Coexpression,21;Enrichr Queries,51;GTEx Coexpression,1056	SPEN,REST,KMT2A,RFX7,ZBTB10,TCF20,ARID2,ZNF8,BPTF
gene_set_query	240	ADNP2	376.7	ARCHS4 Coexpression,530;Enrichr Queries,124;GTEx Coexpression,476	SPEN,SMAD4,ZBTB10,TCF20,ARID2
gene_set_query	241	ZSCAN23	377	ARCHS4 Coexpression,274;Enrichr Queries,455;GTEx Coexpression,402	ZZZ3,SETBP1,CXXC4
gene_set_query	242	ZNF608	377.3	ARCHS4 Coexpression,535;Enrichr Queries,321;GTEx Coexpression,276	SETBP1,TCF4,PRDM1,TP63,BPTF
gene_set_query	243	ZNF7	377.7	ARCHS4 Coexpression,302;Enrichr Queries,779;GTEx Coexpression,52	SMAD4,SETDB1,ZNF507,NRF1,ZNF8
gene_set_query	244	JUN	377.8	Literature ChIP-seq,111;ARCHS4 Coexpression,289;ENCODE ChIP-seq,31;Enrichr Queries,1273;ReMap ChIP-seq,223;GTEx Coexpression,340	SMAD4,ZNF507,XPA,ZBTB10,TCF4,PRDM1,CXXC4,TP63
gene_set_query	245	ZNF776	378	ARCHS4 Coexpression,461;Enrichr Queries,6;GTEx Coexpression,667	SMAD4,KMT2A,ZNF83,ZNF507,RFX7,ZBTB10,NRF1,ARID2,ZNF8,BPTF
gene_set_query	246	PROX2	378.3	ARCHS4 Coexpression,140;Enrichr Queries,486;GTEx Coexpression,509	PRDM5,PRDM1,ZNF8,ESR1,BPTF
gene_set_query	247	ZEB1	378.8	ARCHS4 Coexpression,606;ENCODE ChIP-seq,109;Enrichr Queries,725;ReMap ChIP-seq,165;GTEx Coexpression,289	ZNF584,SETBP1,TCF4,PRDM1
gene_set_query	248	ZFHX4	380.3	ARCHS4 Coexpression,162;Enrichr Queries,670;GTEx Coexpression,309	ZZZ3,SETBP1,CXXC4,BPTF
gene_set_query	249	BACH2	381	ARCHS4 Coexpression,521;Enrichr Queries,351;ReMap ChIP-seq,55;GTEx Coexpression,597	SETBP1,SMAD9,NRF1,PRDM1,BPTF
gene_set_query	250	ZFP30	381	ARCHS4 Coexpression,469;Enrichr Queries,425;GTEx Coexpression,249	KMT2A,SETBP1,ZBTB10,ZNF8,BPTF
gene_set_query	251	PRDM4	381.7	ARCHS4 Coexpression,79;Enrichr Queries,844;GTEx Coexpression,222	SPEN,ZZZ3,ZBTB10,TCF20,ASH1L
gene_set_query	252	BCL11B	381.8	Literature ChIP-seq,161;ARCHS4 Coexpression,409;Enrichr Queries,399;GTEx Coexpression,558	SETBP1,KMT2A,PRDM1,TP63
gene_set_query	253	MYB	382.5	Literature ChIP-seq,121;ARCHS4 Coexpression,480;ENCODE ChIP-seq,112;Enrichr Queries,411;ReMap ChIP-seq,188;GTEx Coexpression,983	KMT2A,RFX7,TCF4,PRDM1,ESR1
gene_set_query	254	DUX4	383	ARCHS4 Coexpression,761;ReMap ChIP-seq,5	SPEN,SMAD9,NRF1,ARID2
gene_set_query	255	ZNF516	383.3	ARCHS4 Coexpression,97;Enrichr Queries,875;GTEx Coexpression,178	SETDB1,SETBP1,TCF20,ARID2,BPTF
gene_set_query	256	NANOG	384.3	Literature ChIP-seq,7;ARCHS4 Coexpression,431;ENCODE ChIP-seq,118;Enrichr Queries,206;ReMap ChIP-seq,29;GTEx Coexpression,1515	SPEN,REST,SETDB1,PRDM5,XPA,TCF4,PRDM1,NRF1,ARID2,ZNF8,ESR1
gene_set_query	257	ZSCAN9	385	ARCHS4 Coexpression,262;GTEx Coexpression,508	SETDB1,CXXC4
gene_set_query	258	ZNF845	385.7	ARCHS4 Coexpression,192;Enrichr Queries,310;GTEx Coexpression,655	REST,ZZZ3,ZNF83,ZNF507
gene_set_query	259	PAX1	386.3	ARCHS4 Coexpression,369;Enrichr Queries,250;GTEx Coexpression,540	MYOD1,ESR1,TP63
gene_set_query	260	MEF2A	391.7	Literature ChIP-seq,30;ARCHS4 Coexpression,1299;ENCODE ChIP-seq,8;Enrichr Queries,439;ReMap ChIP-seq,57;GTEx Coexpression,517	SPEN,SMAD4,ZZZ3,SETBP1,RFX7,PRDM1,ARID2,ESR1,TP63,BPTF
gene_set_query	261	ZNF630	392.5	ARCHS4 Coexpression,625;GTEx Coexpression,160	ZNF83,SMAD9,ZNF8
gene_set_query	262	ZNF813	393	ARCHS4 Coexpression,259;GTEx Coexpression,527	REST,ZNF8
gene_set_query	263	ZNF81	394.3	ARCHS4 Coexpression,92;Enrichr Queries,18;GTEx Coexpression,1073	REST,KMT2A,SETBP1,RFX7,ASH1L,ARID2,BPTF
gene_set_query	264	ZNF626	395	ARCHS4 Coexpression,496;Enrichr Queries,609;GTEx Coexpression,80	ZZZ3,ZNF83,XPA,SMAD9,ZNF8
gene_set_query	265	ZNF583	395	ARCHS4 Coexpression,163;Enrichr Queries,168;GTEx Coexpression,854	SETBP1,PRDM5,ZBTB10,PRDM1,ZNF8
gene_set_query	266	ZNF320	395	ARCHS4 Coexpression,323;Enrichr Queries,442;GTEx Coexpression,420	SETBP1,ZNF83,ZNF8
gene_set_query	267	KDM2B	395.5	ARCHS4 Coexpression,547;GTEx Coexpression,244	TCF20,TP63
gene_set_query	268	ZNF805	395.7	ARCHS4 Coexpression,170;Enrichr Queries,31;GTEx Coexpression,986	KMT2A,ZNF83,ZNF507,ZBTB10,TCF20,ARID2,BPTF
gene_set_query	269	ZNF124	396.7	ARCHS4 Coexpression,144;Enrichr Queries,125;GTEx Coexpression,921	SETBP1,PRDM5,ZBTB10,ASH1L,ZNF8,BPTF
gene_set_query	270	ZNF789	400	ARCHS4 Coexpression,435;Enrichr Queries,389;GTEx Coexpression,376	ZNF83,PRDM1,ZNF8
gene_set_query	271	ZNF765	401.3	ARCHS4 Coexpression,316;Enrichr Queries,230;GTEx Coexpression,658	REST,ZZZ3,ZNF83,RFX7,ZNF8
gene_set_query	272	DMTF1	401.7	ARCHS4 Coexpression,28;Enrichr Queries,1094;GTEx Coexpression,83	KMT2A,ZNF83,TCF4,ARID2,BPTF
gene_set_query	273	HEY1	402.3	ARCHS4 Coexpression,239;Enrichr Queries,668;GTEx Coexpression,300	TCF4,PRDM1
gene_set_query	274	RUNX1	402.4	Literature ChIP-seq,18;ARCHS4 Coexpression,824;Enrichr Queries,347;ReMap ChIP-seq,193;GTEx Coexpression,630	ZNF584,SMAD4,XPA,ZBTB10,TCF20,PRDM1,NRF1,ZNF8,CXXC4,ESR1,MECP2,RFX7,TCF4,ARID2
gene_set_query	275	ZBTB10	402.7	ARCHS4 Coexpression,3;Enrichr Queries,1111;GTEx Coexpression,94	SPEN,SMAD4,SETBP1,KMT2A,ZNF507,SMAD9,ARID2,BPTF
gene_set_query	276	SIM1	403	ARCHS4 Coexpression,598;Enrichr Queries,305;GTEx Coexpression,306	ZZZ3,PRDM1,ESR1,CXXC4
gene_set_query	277	ELF1	404	Literature ChIP-seq,91;ARCHS4 Coexpression,816;ENCODE ChIP-seq,46;ReMap ChIP-seq,162;GTEx Coexpression,905	ZNF584,SPEN,SMAD4,SETDB1,KMT2A,PRDM1
gene_set_query	278	SP2	405.4	ARCHS4 Coexpression,934;ENCODE ChIP-seq,83;Enrichr Queries,110;ReMap ChIP-seq,164;GTEx Coexpression,736	ZNF584,SPEN,MECP2,KMT2A,PRDM1,ZNF8,BPTF
gene_set_query	279	CGGBP1	406	ARCHS4 Coexpression,671;GTEx Coexpression,141	SMAD4,ZZZ3,RFX7
gene_set_query	280	SRY	406.5	Literature ChIP-seq,128;ARCHS4 Coexpression,899;Enrichr Queries,54;GTEx Coexpression,545	SMAD4,REST,MYOD1,PRDM1,ESR1,CXXC4,TP63
gene_set_query	281	ZNF577	408.3	ARCHS4 Coexpression,103;Enrichr Queries,737;GTEx Coexpression,385	ZNF83,PRDM5,ARID2
gene_set_query	282	FOXA1	410.7	Literature ChIP-seq,73;ARCHS4 Coexpression,610;ENCODE ChIP-seq,23;Enrichr Queries,352;ReMap ChIP-seq,11;GTEx Coexpression,1395	SMAD4,KMT2A,ZNF507,ZBTB10,SMAD9,PRDM1,ASH1L,ARID2,ESR1,CXXC4,BPTF
gene_set_query	283	RXRA	410.8	Literature ChIP-seq,135;ARCHS4 Coexpression,757;ENCODE ChIP-seq,18;Enrichr Queries,922;ReMap ChIP-seq,237;GTEx Coexpression,396	ARID2,ESR1,TP63,BPTF
gene_set_query	284	HOXA13	412.3	ARCHS4 Coexpression,548;Enrichr Queries,588;GTEx Coexpression,101	SPEN,SMAD4,SETBP1,PRDM1,ESR1
gene_set_query	285	ZNF793	413	ARCHS4 Coexpression,241;Enrichr Queries,903;GTEx Coexpression,95	KMT2A,SETBP1,ZNF83,ZNF8,BPTF
gene_set_query	286	OTP	413.3	ARCHS4 Coexpression,515;Enrichr Queries,265;GTEx Coexpression,460	PRDM1,CXXC4,ESR1
gene_set_query	287	NANOGP8	414.5	ARCHS4 Coexpression,572;GTEx Coexpression,257	REST,ZZZ3,ZNF83
gene_set_query	288	ZNF518B	415.7	ARCHS4 Coexpression,20;Enrichr Queries,868;GTEx Coexpression,359	SETBP1,ZNF507,ZBTB10,TCF4,ARID2,CXXC4
gene_set_query	289	ZNF45	416	ARCHS4 Coexpression,473;Enrichr Queries,166;GTEx Coexpression,609	ZZZ3,ZNF83,RFX7,BPTF
gene_set_query	290	HOXC4	416	ARCHS4 Coexpression,504;Enrichr Queries,449;GTEx Coexpression,295	SPEN,ZZZ3,PRDM1,ESR1
gene_set_query	291	MAF	416.3	ARCHS4 Coexpression,248;Enrichr Queries,638;ReMap ChIP-seq,209;GTEx Coexpression,570	PRDM1,TP63
gene_set_query	292	THAP12	418	ARCHS4 Coexpression,137;GTEx Coexpression,699	REST,ZZZ3,TCF20
gene_set_query	293	GLI2	418.3	ARCHS4 Coexpression,806;Enrichr Queries,290;GTEx Coexpression,159	SETBP1,PRDM5,PRDM1,ESR1
gene_set_query	294	SOX14	418.7	ARCHS4 Coexpression,507;Enrichr Queries,254;GTEx Coexpression,495	MYOD1,CXXC4,ESR1
gene_set_query	295	ZNF256	419	ARCHS4 Coexpression,212;Enrichr Queries,811;GTEx Coexpression,234	ZNF584,RFX7,ZNF83,ZNF507
gene_set_query	296	KLF5	420.6	Literature ChIP-seq,17;ARCHS4 Coexpression,472;Enrichr Queries,776;ReMap ChIP-seq,230;GTEx Coexpression,608	SPEN,KMT2A,XPA,PRDM1,ZNF8,TP63,BPTF
gene_set_query	297	SOX7	420.7	ARCHS4 Coexpression,339;Enrichr Queries,707;GTEx Coexpression,216	PRDM1,TP63
gene_set_query	298	SREBF2	420.8	Literature ChIP-seq,88;ARCHS4 Coexpression,209;ENCODE ChIP-seq,115;Enrichr Queries,1041;ReMap ChIP-seq,266;GTEx Coexpression,806	TCF20,NRF1,ARID2
gene_set_query	299	ZNF665	421.3	ARCHS4 Coexpression,415;Enrichr Queries,699;GTEx Coexpression,150	ZZZ3,ZNF83,PRDM5,ZNF8
gene_set_query	300	ZNF616	421.7	ARCHS4 Coexpression,291;Enrichr Queries,617;GTEx Coexpression,357	ZZZ3,ZNF83,ZNF8
gene_set_query	301	ZNF875	422	ARCHS4 Coexpression,631;Enrichr Queries,238;GTEx Coexpression,397	SETBP1,ZNF83,ZNF8,ESR1
gene_set_query	302	IRF4	423.2	ARCHS4 Coexpression,615;ENCODE ChIP-seq,89;Enrichr Queries,511;ReMap ChIP-seq,186;GTEx Coexpression,715	PRDM1,ASH1L,ESR1,BPTF
gene_set_query	303	KLF12	423.7	ARCHS4 Coexpression,55;Enrichr Queries,839;GTEx Coexpression,377	SETBP1,KMT2A,RFX7,ZBTB10,TCF4
gene_set_query	304	TCF3	424.8	Literature ChIP-seq,23;ARCHS4 Coexpression,964;ENCODE ChIP-seq,10;Enrichr Queries,393;ReMap ChIP-seq,111;GTEx Coexpression,1048	ZNF584,SMAD4,REST,ZZZ3,KMT2A,RFX7,MYOD1,ZBTB10,TCF20,TCF4,NRF1,ARID2
gene_set_query	305	MYOG	425.3	ARCHS4 Coexpression,643;ENCODE ChIP-seq,44;Enrichr Queries,398;GTEx Coexpression,616	MECP2,SMAD4,RFX7,MYOD1,PRDM5,NRF1,PRDM1,ESR1
gene_set_query	306	SRF	425.5	Literature ChIP-seq,140;ARCHS4 Coexpression,989;ENCODE ChIP-seq,103;Enrichr Queries,801;ReMap ChIP-seq,158;GTEx Coexpression,362	ZNF584,SETBP1,SETDB1,PRDM1
gene_set_query	307	PDX1	428.8	Literature ChIP-seq,106;ARCHS4 Coexpression,771;Enrichr Queries,146;ReMap ChIP-seq,191;GTEx Coexpression,930	MECP2,MYOD1,PRDM1,CXXC4,ESR1
gene_set_query	308	ZNF34	429	ARCHS4 Coexpression,910;Enrichr Queries,374;GTEx Coexpression,3	MECP2,SPEN,KMT2A,SETBP1,ZBTB10,SMAD9,NRF1,ASH1L
gene_set_query	309	ZNF618	429	ARCHS4 Coexpression,489;Enrichr Queries,641;GTEx Coexpression,157	KMT2A,SETBP1,PRDM5,BPTF
gene_set_query	310	PAX6	429.2	Literature ChIP-seq,74;ARCHS4 Coexpression,501;Enrichr Queries,313;ReMap ChIP-seq,105;GTEx Coexpression,1153	ZNF584,PRDM1,ESR1,CXXC4,BPTF
gene_set_query	311	ZNF658	429.5	ARCHS4 Coexpression,68;Enrichr Queries,791	ZNF83,PRDM5,ARID2
gene_set_query	312	ZNF652	429.8	Literature ChIP-seq,156;ARCHS4 Coexpression,583;Enrichr Queries,64;GTEx Coexpression,916	SMAD4,KMT2A,RFX7,ASH1L,BPTF
gene_set_query	313	FOXK2	430.3	ARCHS4 Coexpression,647;Enrichr Queries,517;ReMap ChIP-seq,163;GTEx Coexpression,394	ZNF584,SPEN,TCF20,BPTF
gene_set_query	314	NRF1	430.4	ARCHS4 Coexpression,1286;ENCODE ChIP-seq,29;Enrichr Queries,56;ReMap ChIP-seq,86;GTEx Coexpression,695	MECP2,ZNF584,SPEN,SMAD4,REST,KMT2A,SETDB1,XPA,NRF1,ARID2,BPTF
gene_set_query	315	ZBED4	430.7	ARCHS4 Coexpression,188;Enrichr Queries,237;GTEx Coexpression,867	SPEN,RFX7,TCF20,ARID2
gene_set_query	316	ZNF337	431.7	ARCHS4 Coexpression,168;Enrichr Queries,524;GTEx Coexpression,603	KMT2A,ZNF83,TCF4
gene_set_query	317	FOXA2	432.2	Literature ChIP-seq,107;ARCHS4 Coexpression,542;ENCODE ChIP-seq,108;Enrichr Queries,275;ReMap ChIP-seq,175;GTEx Coexpression,1386	SMAD4,ZNF507,XPA,PRDM1,CXXC4,ESR1
gene_set_query	318	TERF1	433.5	ARCHS4 Coexpression,813;Enrichr Queries,690;ReMap ChIP-seq,124;GTEx Coexpression,107	MECP2,KMT2A,ASH1L,NRF1,BPTF
gene_set_query	319	HNF4A	434.3	Literature ChIP-seq,70;ARCHS4 Coexpression,953;ENCODE ChIP-seq,88;Enrichr Queries,382;ReMap ChIP-seq,218;GTEx Coexpression,895	MECP2,SPEN,SMAD4,ZZZ3,SETBP1,RFX7,ZNF507,PRDM5,ZBTB10,PRDM1,ESR1,CXXC4
gene_set_query	320	MEIS1	434.4	Literature ChIP-seq,115;ARCHS4 Coexpression,1367;Enrichr Queries,294;ReMap ChIP-seq,151;GTEx Coexpression,245	SPEN,SMAD4,REST,SETBP1,PRDM1
gene_set_query	321	ZNF384	434.4	ARCHS4 Coexpression,1440;ENCODE ChIP-seq,34;Enrichr Queries,46;ReMap ChIP-seq,160;GTEx Coexpression,492	SPEN,SMAD4,ZZZ3,SETDB1,KMT2A,SETBP1,ARID2,CXXC4,ESR1,BPTF
gene_set_query	322	MEF2C	435	ARCHS4 Coexpression,361;ENCODE ChIP-seq,42;Enrichr Queries,578;ReMap ChIP-seq,10;GTEx Coexpression,1184	SPEN,KMT2A,TCF4,PRDM1,ARID2,BPTF
gene_set_query	323	FOXP1	435.6	Literature ChIP-seq,53;ARCHS4 Coexpression,1280;Enrichr Queries,205;ReMap ChIP-seq,72;GTEx Coexpression,568	SPEN,SMAD4,REST,SETBP1,TCF4,PRDM1,ASH1L,ARID2,CXXC4,BPTF
gene_set_query	324	ZNF596	435.7	ARCHS4 Coexpression,573;Enrichr Queries,481;GTEx Coexpression,253	SETBP1,ZNF507,PRDM1,ZNF8,BPTF
gene_set_query	325	FERD3L	437.3	ARCHS4 Coexpression,820;Enrichr Queries,148;GTEx Coexpression,344	ZZZ3,MYOD1,PRDM1,ESR1
gene_set_query	326	RREB1	437.7	ARCHS4 Coexpression,537;Enrichr Queries,122;GTEx Coexpression,654	SPEN,KMT2A,PRDM1,TP63,BPTF
gene_set_query	327	HMBOX1	437.8	ARCHS4 Coexpression,49;Enrichr Queries,115;ReMap ChIP-seq,277;GTEx Coexpression,1310	SPEN,KMT2A,ASH1L,ZNF8,BPTF
gene_set_query	328	ZNF708	439	ARCHS4 Coexpression,270;Enrichr Queries,99;GTEx Coexpression,948	REST,ZNF83,ZNF507,ZBTB10,ZNF8
gene_set_query	329	CEBPD	439	Literature ChIP-seq,45;ARCHS4 Coexpression,1048;ENCODE ChIP-seq,86;ReMap ChIP-seq,93;GTEx Coexpression,923	ZNF584,SPEN,KMT2A,SETBP1,ARID2
gene_set_query	330	ZNF24	440.5	ARCHS4 Coexpression,53;Enrichr Queries,214;ReMap ChIP-seq,51;GTEx Coexpression,1444	SPEN,SMAD4,RFX7,ZNF507,ZBTB10,ARID2,BPTF
gene_set_query	331	KAT7	441	ARCHS4 Coexpression,386;GTEx Coexpression,496	ARID2,ZNF8
gene_set_query	332	LCOR	441.7	ARCHS4 Coexpression,10;Enrichr Queries,39;GTEx Coexpression,1276	SPEN,KMT2A,RFX7,TCF4,ASH1L,ARID2,BPTF
gene_set_query	333	ZNF761	442.3	ARCHS4 Coexpression,444;Enrichr Queries,592;GTEx Coexpression,291	ZNF83,ARID2
gene_set_query	334	SAFB	442.5	ARCHS4 Coexpression,676;GTEx Coexpression,209	SETDB1,NRF1
gene_set_query	335	HOXC11	443.5	ARCHS4 Coexpression,627;Enrichr Queries,291;ReMap ChIP-seq,294;GTEx Coexpression,562	ZZZ3,PRDM1,ESR1
gene_set_query	336	ZFP64	443.7	ARCHS4 Coexpression,83;Enrichr Queries,1065;GTEx Coexpression,183	SETDB1,TCF20,ZNF8,TP63
gene_set_query	337	RUNX2	444	Literature ChIP-seq,28;ARCHS4 Coexpression,1170;Enrichr Queries,360;ReMap ChIP-seq,157;GTEx Coexpression,505	MECP2,REST,ZZZ3,KMT2A,SETBP1,XPA,PRDM1,NRF1,ESR1
gene_set_query	338	ZBTB8B	445	ARCHS4 Coexpression,410;GTEx Coexpression,480	ZNF8,CXXC4
gene_set_query	339	GTF2IRD2	445	ARCHS4 Coexpression,331;Enrichr Queries,985;GTEx Coexpression,19	SMAD4,SETBP1,PRDM5,XPA,NRF1,ZNF8
gene_set_query	340	HIVEP3	446	ARCHS4 Coexpression,482;Enrichr Queries,451;GTEx Coexpression,405	SPEN,SETBP1,PRDM1,TP63
gene_set_query	341	ZBTB38	446.3	ARCHS4 Coexpression,463;Enrichr Queries,727;GTEx Coexpression,149	ZZZ3,ZNF507,PRDM1,ASH1L
gene_set_query	342	ZNF331	447	ARCHS4 Coexpression,812;Enrichr Queries,149;GTEx Coexpression,380	SETBP1,ZBTB10,PRDM1
gene_set_query	343	DLX4	448	Literature ChIP-seq,164;ARCHS4 Coexpression,759;Enrichr Queries,280;GTEx Coexpression,589	PRDM1,ESR1,TP63
gene_set_query	344	ZNF471	448.3	ARCHS4 Coexpression,345;Enrichr Queries,740;GTEx Coexpression,260	KMT2A,ZNF83,PRDM5
gene_set_query	345	CDX2	449.8	Literature ChIP-seq,3;ARCHS4 Coexpression,975;Enrichr Queries,283;ReMap ChIP-seq,217;GTEx Coexpression,771	SPEN,RFX7,TCF20,PRDM1,ARID2,ESR1
gene_set_query	346	PAX9	450	ARCHS4 Coexpression,486;Enrichr Queries,315;GTEx Coexpression,549	PRDM1,ESR1,TP63
gene_set_query	347	TCF20	450.7	ARCHS4 Coexpression,993;Enrichr Queries,128;GTEx Coexpression,231	SPEN,KMT2A,ASH1L,ARID2,TP63,BPTF
gene_set_query	348	GTF2IRD1	452	ARCHS4 Coexpression,518;GTEx Coexpression,386	MYOD1,ZNF8
gene_set_query	349	FOXL2	453.3	ARCHS4 Coexpression,739;Enrichr Queries,256;GTEx Coexpression,365	PRDM5,PRDM1,ESR1
gene_set_query	350	ATF7	453.5	ARCHS4 Coexpression,1409;Enrichr Queries,48;ReMap ChIP-seq,254;GTEx Coexpression,103	SPEN,MECP2,SMAD4,SETBP1,KMT2A,ASH1L,ARID2,BPTF
gene_set_query	351	GATA2	453.7	Literature ChIP-seq,22;ARCHS4 Coexpression,1415;ENCODE ChIP-seq,14;Enrichr Queries,794;ReMap ChIP-seq,132;GTEx Coexpression,345	MECP2,SETDB1,ZNF83,RFX7,XPA,ZBTB10,TCF4,PRDM1,ESR1,CXXC4
gene_set_query	352	LHX4	453.7	ARCHS4 Coexpression,12;Enrichr Queries,370;GTEx Coexpression,979	SPEN,KMT2A,RFX7,TCF20,PRDM1,ESR1,BPTF
gene_set_query	353	MITF	456.6	Literature ChIP-seq,100;ARCHS4 Coexpression,1202;Enrichr Queries,306;ReMap ChIP-seq,65;GTEx Coexpression,610	ZNF584,MECP2,SMAD4,ZZZ3,SETBP1,ZNF507,ZBTB10,TCF4,PRDM1,ASH1L,ESR1,BPTF
gene_set_query	354	ZFP14	456.7	ARCHS4 Coexpression,421;Enrichr Queries,821;GTEx Coexpression,128	KMT2A,ZNF83,PRDM1,ZNF8,BPTF
gene_set_query	355	PAX5	458	ARCHS4 Coexpression,973;ENCODE ChIP-seq,26;Enrichr Queries,198;ReMap ChIP-seq,87;GTEx Coexpression,1006	ZNF584,SPEN,SETBP1,PRDM1,NRF1,ARID2,ESR1
gene_set_query	356	GPBP1L1	458.5	ARCHS4 Coexpression,648;GTEx Coexpression,269	SETDB1,TCF20,ARID2
gene_set_query	357	SMAD3	459.2	Literature ChIP-seq,24;ARCHS4 Coexpression,1192;Enrichr Queries,179;ReMap ChIP-seq,181;GTEx Coexpression,720	SPEN,SMAD4,SETBP1,XPA,TCF4,PRDM1,ESR1
gene_set_query	358	ZNF251	459.3	ARCHS4 Coexpression,57;Enrichr Queries,1115;GTEx Coexpression,206	KMT2A,ZNF83,TCF4,ARID2
gene_set_query	359	ZFP69B	460	ARCHS4 Coexpression,108;GTEx Coexpression,812	RFX7,TCF4
gene_set_query	360	SMAD9	461.7	ARCHS4 Coexpression,47;Enrichr Queries,1309;GTEx Coexpression,29	MECP2,SMAD4,SETBP1,XPA,ZBTB10,TCF4,ZNF8,CXXC4
gene_set_query	361	ZNF566	463.7	ARCHS4 Coexpression,427;Enrichr Queries,190;GTEx Coexpression,774	ZZZ3,ZNF83,ZNF507,ZNF8
gene_set_query	362	BHLHE40	464	ARCHS4 Coexpression,950;ENCODE ChIP-seq,16;ReMap ChIP-seq,189;GTEx Coexpression,701	SPEN,SETDB1,ZNF507,ZBTB10,NRF1,ASH1L,TP63,BPTF
gene_set_query	363	FOXK1	464.3	ARCHS4 Coexpression,189;Enrichr Queries,508;ReMap ChIP-seq,116;GTEx Coexpression,1044	ZNF584,SPEN,KMT2A,TCF20
gene_set_query	364	GSC	465.3	ARCHS4 Coexpression,694;Enrichr Queries,262;GTEx Coexpression,440	TCF4,PRDM1,ESR1
gene_set_query	365	ZNF619	466.3	ARCHS4 Coexpression,402;Enrichr Queries,17;GTEx Coexpression,980	REST,KMT2A,SETBP1,SMAD9,PRDM1,ARID2,ZNF8,BPTF
gene_set_query	366	RELA	467	Literature ChIP-seq,26;ARCHS4 Coexpression,1184;ENCODE ChIP-seq,22;Enrichr Queries,470;ReMap ChIP-seq,33;GTEx Coexpression,1067	ZNF584,SPEN,SMAD4,KMT2A,ZNF83,ZBTB10,PRDM1,ARID2,ESR1,TP63
gene_set_query	367	ZNF426	467.3	ARCHS4 Coexpression,303;Enrichr Queries,452;GTEx Coexpression,647	ZNF83,PRDM1,ZNF8
gene_set_query	368	ZNF611	467.7	ARCHS4 Coexpression,120;Enrichr Queries,126;GTEx Coexpression,1157	ZNF83,PRDM5,PRDM1,ASH1L,ZNF8,BPTF
gene_set_query	369	ZNF747	469	ARCHS4 Coexpression,398;Enrichr Queries,587;GTEx Coexpression,422	ZNF584,PRDM1,ZNF8
gene_set_query	370	OSR2	469.3	ARCHS4 Coexpression,686;Enrichr Queries,576;GTEx Coexpression,146	PRDM5,PRDM1,ESR1
gene_set_query	371	PAX3	471.7	ARCHS4 Coexpression,777;Enrichr Queries,365;GTEx Coexpression,273	RFX7,MYOD1,PRDM1,ESR1
gene_set_query	372	ZNF195	472.7	ARCHS4 Coexpression,230;Enrichr Queries,170;GTEx Coexpression,1018	ZZZ3,RFX7,ARID2,BPTF
gene_set_query	373	ARID2	472.8	ARCHS4 Coexpression,207;Enrichr Queries,44;ReMap ChIP-seq,225;GTEx Coexpression,1415	SPEN,SMAD4,KMT2A,RFX7,ASH1L,BPTF
gene_set_query	374	KLF4	472.8	Literature ChIP-seq,36;ARCHS4 Coexpression,778;Enrichr Queries,810;ReMap ChIP-seq,204;GTEx Coexpression,536	PRDM1,TP63
gene_set_query	375	ATF3	474	Literature ChIP-seq,138;ARCHS4 Coexpression,1212;ENCODE ChIP-seq,5;Enrichr Queries,872;ReMap ChIP-seq,205;GTEx Coexpression,412	ZZZ3,KMT2A,ZNF507,ZBTB10,PRDM1,BPTF
gene_set_query	376	ZNF599	474.3	ARCHS4 Coexpression,591;Enrichr Queries,476;GTEx Coexpression,356	SETBP1,ZNF507,ZBTB10,ZNF8
gene_set_query	377	KLF8	476	ARCHS4 Coexpression,119;Enrichr Queries,704;GTEx Coexpression,605	PRDM5,PRDM1,ZNF8,TP63
gene_set_query	378	ERG	476.6	Literature ChIP-seq,86;ARCHS4 Coexpression,1527;Enrichr Queries,274;ReMap ChIP-seq,170;GTEx Coexpression,326	ZNF584,MYOD1,TCF4,PRDM1,ESR1
gene_set_query	379	IRF1	476.8	Literature ChIP-seq,87;ARCHS4 Coexpression,904;ENCODE ChIP-seq,57;Enrichr Queries,570;ReMap ChIP-seq,250;GTEx Coexpression,993	SMAD4,SETDB1,ZNF83,ZNF507,ZBTB10,PRDM1,NRF1,ARID2,TP63
gene_set_query	380	ZNF304	478.3	ARCHS4 Coexpression,1042;Enrichr Queries,163;GTEx Coexpression,230	ZNF584,SETBP1,ZNF83,ZBTB10,ASH1L
gene_set_query	381	ZNF333	479.3	ARCHS4 Coexpression,1304;Enrichr Queries,130;GTEx Coexpression,4	MECP2,SPEN,SMAD4,KMT2A,SETDB1,SETBP1,PRDM5,NRF1,ASH1L,BPTF
gene_set_query	382	ZNF713	479.3	ARCHS4 Coexpression,233;Enrichr Queries,194;GTEx Coexpression,1011	KMT2A,SETBP1,SMAD9,ZNF8
gene_set_query	383	EN1	480.3	ARCHS4 Coexpression,628;Enrichr Queries,549;GTEx Coexpression,264	RFX7,PRDM1,CXXC4,TP63
gene_set_query	384	ZNF121	481	ARCHS4 Coexpression,201;Enrichr Queries,628;GTEx Coexpression,614	ZNF507,ZNF8,TP63
gene_set_query	385	SKIL	482	ARCHS4 Coexpression,247;Enrichr Queries,856;GTEx Coexpression,343	ZBTB10,PRDM1,ARID2
gene_set_query	386	RARA	483.4	Literature ChIP-seq,134;ARCHS4 Coexpression,887;Enrichr Queries,390;ReMap ChIP-seq,67;GTEx Coexpression,939	ZNF584,SPEN,SETDB1,PRDM1,ESR1
gene_set_query	387	EGR1	483.8	Literature ChIP-seq,65;ARCHS4 Coexpression,24;ENCODE ChIP-seq,40;Enrichr Queries,1089;ReMap ChIP-seq,115;GTEx Coexpression,1570	SPEN,SETDB1,PRDM5,ZBTB10,ARID2,CXXC4,ESR1,BPTF
gene_set_query	388	HDX	484	ARCHS4 Coexpression,216;Enrichr Queries,884;GTEx Coexpression,352	ZBTB10,TCF4,PRDM1
gene_set_query	389	ZNF335	484.3	ARCHS4 Coexpression,341;Enrichr Queries,949;ReMap ChIP-seq,297;GTEx Coexpression,350	SPEN,SETDB1,TCF20
gene_set_query	390	HOXD11	484.7	ARCHS4 Coexpression,612;Enrichr Queries,558;GTEx Coexpression,284	SPEN,SETBP1,ESR1
gene_set_query	391	SPI1	484.7	Literature ChIP-seq,44;ARCHS4 Coexpression,942;ENCODE ChIP-seq,66;Enrichr Queries,1000;ReMap ChIP-seq,73;GTEx Coexpression,783	SPEN,ZZZ3,SETDB1,RFX7,TCF4,PRDM1
gene_set_query	392	FOXJ2	485.8	ARCHS4 Coexpression,1389;Enrichr Queries,505;ReMap ChIP-seq,16;GTEx Coexpression,33	SPEN,MECP2,ZNF584,SMAD4,SETBP1,KMT2A,NRF1,ASH1L
gene_set_query	393	ZNF440	486	ARCHS4 Coexpression,392;Enrichr Queries,380;GTEx Coexpression,686	ZNF83,ZBTB10,ZNF8,TP63
gene_set_query	394	ZNF112	486.5	ARCHS4 Coexpression,282;GTEx Coexpression,691	TCF4,ASH1L
gene_set_query	395	TEAD4	486.7	Literature ChIP-seq,50;ARCHS4 Coexpression,860;ENCODE ChIP-seq,41;Enrichr Queries,1276;ReMap ChIP-seq,142;GTEx Coexpression,551	SPEN,MYOD1,TCF20,TCF4,NRF1,PRDM1,ARID2
gene_set_query	396	ZNF286A	487	ARCHS4 Coexpression,76;Enrichr Queries,1195;GTEx Coexpression,190	KMT2A,TCF4,ARID2,BPTF
gene_set_query	397	PRDM14	488	Literature ChIP-seq,117;ARCHS4 Coexpression,416;Enrichr Queries,277;ReMap ChIP-seq,249;GTEx Coexpression,1381	SETDB1,PRDM1,ESR1,BPTF
gene_set_query	398	ZNF781	488.7	ARCHS4 Coexpression,134;Enrichr Queries,485;GTEx Coexpression,847	REST,SETBP1,ZNF83,TCF4
gene_set_query	399	ZNF570	489.3	ARCHS4 Coexpression,254;Enrichr Queries,183;GTEx Coexpression,1031	ZNF83,PRDM1,ZNF8,BPTF
gene_set_query	400	NR5A2	490.5	ARCHS4 Coexpression,680;Enrichr Queries,331;ReMap ChIP-seq,44;GTEx Coexpression,907	SETDB1,PRDM1,ESR1
gene_set_query	401	SOX13	490.5	ARCHS4 Coexpression,852;Enrichr Queries,781;ReMap ChIP-seq,147;GTEx Coexpression,182	SMAD4,SETBP1,PRDM1,ARID2
gene_set_query	402	THAP1	491.4	ARCHS4 Coexpression,1094;ENCODE ChIP-seq,7;Enrichr Queries,29;ReMap ChIP-seq,278;GTEx Coexpression,1049	SMAD4,REST,ZZZ3,KMT2A,ZNF507,ZBTB10,PRDM1,NRF1,ZNF8,ESR1,BPTF
gene_set_query	403	ZNF28	492.7	ARCHS4 Coexpression,252;Enrichr Queries,924;GTEx Coexpression,302	REST,ZNF83,ARID2
gene_set_query	404	POU5F1	493	Literature ChIP-seq,16;ARCHS4 Coexpression,949;Enrichr Queries,187;ReMap ChIP-seq,94;GTEx Coexpression,1219	SPEN,REST,TCF20,TCF4,PRDM1,ARID2,ESR1
gene_set_query	405	ZNF180	493.7	ARCHS4 Coexpression,197;Enrichr Queries,178;GTEx Coexpression,1106	ZZZ3,ZNF507,ZBTB10,ARID2
gene_set_query	406	ZNF460	494.3	ARCHS4 Coexpression,96;Enrichr Queries,68;GTEx Coexpression,1319	REST,ZZZ3,KMT2A,ZBTB10,PRDM1,ASH1L
gene_set_query	407	ZNF709	496	ARCHS4 Coexpression,46;Enrichr Queries,243;GTEx Coexpression,1199	SETBP1,ZNF83,TCF4,ARID2,ESR1,CXXC4
gene_set_query	408	E2F5	496.3	ARCHS4 Coexpression,52;Enrichr Queries,1321;ReMap ChIP-seq,97;GTEx Coexpression,515	SETDB1,ZNF83,TCF4,ZNF8,ARID2
gene_set_query	409	SIM2	496.7	ARCHS4 Coexpression,407;Enrichr Queries,408;GTEx Coexpression,675	PRDM1,ZNF8,ESR1
gene_set_query	410	LHX9	497.3	ARCHS4 Coexpression,738;Enrichr Queries,373;GTEx Coexpression,381	PRDM5,PRDM1,ESR1
gene_set_query	411	ZKSCAN3	498.3	ARCHS4 Coexpression,255;Enrichr Queries,1011;GTEx Coexpression,229	SMAD4,REST,ZNF8
gene_set_query	412	TRERF1	499.3	ARCHS4 Coexpression,787;Enrichr Queries,497;GTEx Coexpression,214	SETBP1,TCF20,PRDM1
gene_set_query	413	FOSL2	499.6	ARCHS4 Coexpression,785;ENCODE ChIP-seq,101;Enrichr Queries,852;ReMap ChIP-seq,228;GTEx Coexpression,532	PRDM1,ZNF8,CXXC4
gene_set_query	414	MTERF4	501	ARCHS4 Coexpression,629;GTEx Coexpression,373	ZNF83,PRDM5
gene_set_query	415	ZNF597	501	ARCHS4 Coexpression,417;Enrichr Queries,567;GTEx Coexpression,519	REST,PRDM1
gene_set_query	416	ZNF396	501	ARCHS4 Coexpression,406;Enrichr Queries,119;GTEx Coexpression,978	SETBP1,PRDM1,ZNF8,CXXC4,ESR1
gene_set_query	417	STAT3	501.2	Literature ChIP-seq,63;ARCHS4 Coexpression,1068;ENCODE ChIP-seq,72;Enrichr Queries,669;ReMap ChIP-seq,92;GTEx Coexpression,1043	SPEN,ZNF584,SMAD4,SETBP1,XPA,ZBTB10,TCF4,PRDM1,NRF1
gene_set_query	418	ZNF699	501.3	ARCHS4 Coexpression,956;Enrichr Queries,173;GTEx Coexpression,375	REST,SETBP1,ZNF83,PRDM1
gene_set_query	419	ZNF234	501.3	ARCHS4 Coexpression,340;Enrichr Queries,885;GTEx Coexpression,279	REST,ZZZ3,ZNF83,ZNF8
gene_set_query	420	ZBTB41	501.3	ARCHS4 Coexpression,273;Enrichr Queries,229;GTEx Coexpression,1002	ZZZ3,RFX7,ASH1L,CXXC4
gene_set_query	421	FOXN3	503.3	ARCHS4 Coexpression,559;Enrichr Queries,890;GTEx Coexpression,61	SPEN,SMAD4,SETBP1,ASH1L
gene_set_query	422	KLF14	503.5	ARCHS4 Coexpression,830;Enrichr Queries,177	MYOD1,PRDM1,ESR1
gene_set_query	423	SIX5	503.8	ARCHS4 Coexpression,967;ENCODE ChIP-seq,81;Enrichr Queries,1260;ReMap ChIP-seq,138;GTEx Coexpression,73	ZNF584,SMAD4,SETBP1,PRDM5,ZNF8
gene_set_query	424	VDR	504.6	Literature ChIP-seq,72;ARCHS4 Coexpression,957;Enrichr Queries,438;ReMap ChIP-seq,35;GTEx Coexpression,1021	ZNF584,SETDB1,PRDM1,ARID2,ESR1
gene_set_query	425	FOXI3	505	ARCHS4 Coexpression,453;GTEx Coexpression,557	ZNF8,TP63
gene_set_query	426	ZNF211	506.7	ARCHS4 Coexpression,221;Enrichr Queries,930;GTEx Coexpression,369	ZNF83
gene_set_query	427	PCGF2	507	ARCHS4 Coexpression,855;ReMap ChIP-seq,159	CXXC4
gene_set_query	428	ZNF556	508	ARCHS4 Coexpression,226;Enrichr Queries,657;GTEx Coexpression,641	SETBP1,MYOD1,ZNF8
gene_set_query	429	ZNF26	508	ARCHS4 Coexpression,334;Enrichr Queries,349;GTEx Coexpression,841	ZZZ3,ZNF83,ZNF8
gene_set_query	430	BATF	508.2	ARCHS4 Coexpression,552;ENCODE ChIP-seq,21;Enrichr Queries,951;ReMap ChIP-seq,25;GTEx Coexpression,992	ZBTB10,PRDM1,ASH1L,TP63
gene_set_query	431	HSF1	508.8	Literature ChIP-seq,76;ARCHS4 Coexpression,1437;ENCODE ChIP-seq,117;ReMap ChIP-seq,64;GTEx Coexpression,850	ZNF584,SPEN,TCF20,ESR1
gene_set_query	432	LHX6	509.3	ARCHS4 Coexpression,556;Enrichr Queries,647;GTEx Coexpression,325	TCF4,PRDM1
gene_set_query	433	ELK1	509.4	Literature ChIP-seq,5;ARCHS4 Coexpression,1446;ENCODE ChIP-seq,77;ReMap ChIP-seq,190;GTEx Coexpression,829	ZNF584,SMAD4,SETDB1,XPA,NRF1,ARID2,CXXC4,TP63
gene_set_query	434	MYC	510	Literature ChIP-seq,10;ARCHS4 Coexpression,1128;ENCODE ChIP-seq,56;Enrichr Queries,1223;ReMap ChIP-seq,91;GTEx Coexpression,552	ZNF584,SPEN,SMAD4,KMT2A,RFX7,ZBTB10,NRF1,ZNF8,ARID2,CXXC4,TP63
gene_set_query	435	TFAP2B	510.3	ARCHS4 Coexpression,585;Enrichr Queries,297;GTEx Coexpression,649	PRDM1,ESR1,TP63,BPTF
gene_set_query	436	NFE2L2	511	Literature ChIP-seq,54;ARCHS4 Coexpression,523;Enrichr Queries,1247;ReMap ChIP-seq,203;GTEx Coexpression,528	SETBP1,TCF4,ESR1,TP63
gene_set_query	437	CTCFL	511.6	ARCHS4 Coexpression,317;ENCODE ChIP-seq,25;Enrichr Queries,645;ReMap ChIP-seq,243;GTEx Coexpression,1328	ZNF584,SETDB1,ZNF507,RFX7,NRF1,ZNF8,ESR1,BPTF
gene_set_query	438	MYF5	512	ARCHS4 Coexpression,905;Enrichr Queries,169;GTEx Coexpression,462	MYOD1,PRDM1,ESR1
gene_set_query	439	NR3C2	512.3	ARCHS4 Coexpression,721;Enrichr Queries,293;GTEx Coexpression,523	SETBP1,SMAD9,ESR1
gene_set_query	440	EVX1	512.3	ARCHS4 Coexpression,716;Enrichr Queries,527;GTEx Coexpression,294	PRDM1,ESR1
gene_set_query	441	PRDM16	512.5	Literature ChIP-seq,155;ARCHS4 Coexpression,1109;Enrichr Queries,625;GTEx Coexpression,161	XPA,SMAD9,ESR1
gene_set_query	442	ZNF75A	513	ARCHS4 Coexpression,743;Enrichr Queries,367;GTEx Coexpression,429	ZNF507,ZNF83,BPTF
gene_set_query	443	FOXM1	513.8	Literature ChIP-seq,4;ARCHS4 Coexpression,756;ENCODE ChIP-seq,45;Enrichr Queries,1082;ReMap ChIP-seq,80;GTEx Coexpression,1116	SPEN,ZZZ3,KMT2A,SETBP1,ZNF507,ZBTB10,TCF4,ARID2,ESR1
gene_set_query	444	ZNF891	514	ARCHS4 Coexpression,376;GTEx Coexpression,652	ZNF507,ZNF8
gene_set_query	445	SMAD5	514	ARCHS4 Coexpression,1544;Enrichr Queries,57;ReMap ChIP-seq,270;GTEx Coexpression,185	SMAD4,ZZZ3,RFX7,ASH1L,ARID2,BPTF
gene_set_query	446	SOX2	514.2	Literature ChIP-seq,14;ARCHS4 Coexpression,652;Enrichr Queries,338;ReMap ChIP-seq,3;GTEx Coexpression,1564	SPEN,MECP2,SMAD4,REST,KMT2A,RFX7,XPA,PRDM1,ARID2,ESR1,CXXC4,BPTF
gene_set_query	447	HOXA11	514.3	ARCHS4 Coexpression,1051;Enrichr Queries,427;GTEx Coexpression,65	SMAD4,SETBP1,PRDM1,ESR1
gene_set_query	448	ZNF490	514.7	ARCHS4 Coexpression,249;Enrichr Queries,208;GTEx Coexpression,1087	SMAD4,RFX7,ASH1L,ZNF8
gene_set_query	449	BHLHE22	515.7	ARCHS4 Coexpression,438;ReMap ChIP-seq,282;GTEx Coexpression,827	TCF4
gene_set_query	450	ASCL1	515.8	ARCHS4 Coexpression,917;Enrichr Queries,568;ReMap ChIP-seq,150;GTEx Coexpression,428	TCF20,CXXC4,ESR1
gene_set_query	451	FOXE1	517.7	ARCHS4 Coexpression,658;Enrichr Queries,342;GTEx Coexpression,553	SMAD9,PRDM1,ESR1,TP63
gene_set_query	452	ZNF480	518.7	ARCHS4 Coexpression,237;Enrichr Queries,204;GTEx Coexpression,1115	ZZZ3,ZNF83,RFX7,PRDM5
gene_set_query	453	NR2F2	518.8	ARCHS4 Coexpression,1548;ENCODE ChIP-seq,82;Enrichr Queries,642;ReMap ChIP-seq,214;GTEx Coexpression,108	SMAD4,SETBP1,PRDM5,PRDM1,ESR1
gene_set_query	454	FLI1	518.8	Literature ChIP-seq,122;ARCHS4 Coexpression,729;ENCODE ChIP-seq,105;Enrichr Queries,650;ReMap ChIP-seq,207;GTEx Coexpression,1300	SETDB1,RFX7,PRDM1,CXXC4
gene_set_query	455	RFX3	519	ARCHS4 Coexpression,593;Enrichr Queries,221;GTEx Coexpression,743	SETBP1,RFX7,ARID2,CXXC4
gene_set_query	456	E2F1	519.3	Literature ChIP-seq,2;ARCHS4 Coexpression,977;ENCODE ChIP-seq,35;Enrichr Queries,1083;ReMap ChIP-seq,34;GTEx Coexpression,985	ZNF584,SPEN,MECP2,SMAD4,KMT2A,ZNF83,RFX7,PRDM5,SMAD9,TCF20,ARID2,BPTF
gene_set_query	457	HNF1B	519.3	ARCHS4 Coexpression,815;Enrichr Queries,616;ReMap ChIP-seq,127	ZNF507,PRDM1
gene_set_query	458	SCMH1	519.5	ARCHS4 Coexpression,881;GTEx Coexpression,158	SMAD4,SETBP1
gene_set_query	459	GRHL1	519.7	ARCHS4 Coexpression,281;Enrichr Queries,745;GTEx Coexpression,533	PRDM1,TP63
gene_set_query	460	HOXC8	520	ARCHS4 Coexpression,34;Enrichr Queries,1210;GTEx Coexpression,316	ZZZ3,KMT2A,ASH1L,ESR1,BPTF
gene_set_query	461	GATAD2A	520.3	ARCHS4 Coexpression,460;Enrichr Queries,896;GTEx Coexpression,205	SPEN,TCF20,ARID2
gene_set_query	462	ZNF441	521	ARCHS4 Coexpression,971;Enrichr Queries,460;GTEx Coexpression,132	MECP2,KMT2A,SETBP1,ZNF83,ASH1L
gene_set_query	463	GLI3	521	ARCHS4 Coexpression,577;Enrichr Queries,571;GTEx Coexpression,415	ZZZ3,SETBP1,BPTF
gene_set_query	464	KIN	523	ARCHS4 Coexpression,292;Enrichr Queries,996;GTEx Coexpression,281	SETDB1,NRF1,ZNF8
gene_set_query	465	BNC1	525	ARCHS4 Coexpression,653;Enrichr Queries,666;GTEx Coexpression,256	TCF20,PRDM1,TP63
gene_set_query	466	TP63	525.2	Literature ChIP-seq,66;ARCHS4 Coexpression,1079;Enrichr Queries,381;ReMap ChIP-seq,236;GTEx Coexpression,864	SMAD9,PRDM1,ESR1
gene_set_query	467	ZNF676	526.3	ARCHS4 Coexpression,272;Enrichr Queries,1153;GTEx Coexpression,154	REST,PRDM5,SMAD9
gene_set_query	468	BBX	529.3	ARCHS4 Coexpression,67;Enrichr Queries,98;GTEx Coexpression,1423	KMT2A,ASH1L,ARID2,BPTF
gene_set_query	469	TLX2	531.7	ARCHS4 Coexpression,181;Enrichr Queries,147;GTEx Coexpression,1267	SETDB1,MYOD1,SMAD9,PRDM1,ESR1
gene_set_query	470	ZBTB25	531.7	ARCHS4 Coexpression,243;Enrichr Queries,775;GTEx Coexpression,577	ZNF83,PRDM1,ZNF8
gene_set_query	471	ZBED5	532	ARCHS4 Coexpression,794;GTEx Coexpression,270	SMAD4,ZNF83
gene_set_query	472	ZNF565	532.3	ARCHS4 Coexpression,315;Enrichr Queries,719;GTEx Coexpression,563	KMT2A,ZNF507,TCF4
gene_set_query	473	IRX5	532.7	ARCHS4 Coexpression,562;Enrichr Queries,421;GTEx Coexpression,615	SETBP1,PRDM1,ESR1,TP63
gene_set_query	474	ZNF778	533	ARCHS4 Coexpression,210;Enrichr Queries,876;GTEx Coexpression,513	ZNF584,ASH1L,ZNF8
gene_set_query	475	BCL6	533.2	Literature ChIP-seq,125;ARCHS4 Coexpression,1024;Enrichr Queries,761;ReMap ChIP-seq,176;GTEx Coexpression,580	SPEN,KMT2A,NRF1,PRDM1
gene_set_query	476	PROX1	533.5	ARCHS4 Coexpression,471;Enrichr Queries,682;ReMap ChIP-seq,49;GTEx Coexpression,932	SETBP1,XPA,TCF4,PRDM1
gene_set_query	477	PATZ1	534	ARCHS4 Coexpression,913;Enrichr Queries,388;GTEx Coexpression,301	ZNF83,ARID2,BPTF
gene_set_query	478	PHF20	534.3	ARCHS4 Coexpression,78;Enrichr Queries,143;GTEx Coexpression,1382	SPEN,KMT2A,ASH1L,ARID2,BPTF
gene_set_query	479	GRHL3	535	ARCHS4 Coexpression,494;Enrichr Queries,828;GTEx Coexpression,283	PRDM1,TP63
gene_set_query	480	ALX4	535.7	ARCHS4 Coexpression,1225;Enrichr Queries,284;GTEx Coexpression,98	ZZZ3,RFX7,PRDM1,ESR1,TP63
gene_set_query	481	VSX1	536.3	ARCHS4 Coexpression,603;Enrichr Queries,279;GTEx Coexpression,727	PRDM1,ZNF8,ESR1
gene_set_query	482	POU3F2	536.5	Literature ChIP-seq,89;ARCHS4 Coexpression,185;Enrichr Queries,312;GTEx Coexpression,1560	ZZZ3,TCF4,PRDM1,ARID2,CXXC4
gene_set_query	483	ZNF750	538.5	ARCHS4 Coexpression,564;Enrichr Queries,857;ReMap ChIP-seq,198;GTEx Coexpression,535	KMT2A,PRDM1,TP63
gene_set_query	484	SHOX2	539	ARCHS4 Coexpression,683;Enrichr Queries,574;GTEx Coexpression,360	ZZZ3,PRDM1
gene_set_query	485	STAT5A	539.2	Literature ChIP-seq,129;ARCHS4 Coexpression,984;ENCODE ChIP-seq,6;Enrichr Queries,847;ReMap ChIP-seq,219;GTEx Coexpression,1050	KMT2A,ZNF83,ZBTB10,PRDM1
gene_set_query	486	HES1	539.5	ARCHS4 Coexpression,679;Enrichr Queries,664;ReMap ChIP-seq,290;GTEx Coexpression,525	PRDM1,TP63
gene_set_query	487	ZNF334	539.7	ARCHS4 Coexpression,271;Enrichr Queries,1149;GTEx Coexpression,199	ZNF83,TCF4,BPTF
gene_set_query	488	FOXN1	542.3	ARCHS4 Coexpression,576;Enrichr Queries,363;GTEx Coexpression,688	PRDM1,ESR1,TP63
gene_set_query	489	ZBTB6	543	ARCHS4 Coexpression,160;Enrichr Queries,105;GTEx Coexpression,1364	SMAD4,ZZZ3,TCF20,ARID2,BPTF
gene_set_query	490	PBX3	543	ARCHS4 Coexpression,511;ENCODE ChIP-seq,80;Enrichr Queries,660;ReMap ChIP-seq,144;GTEx Coexpression,1320	ZNF584,MECP2,SETDB1,PRDM1,ZNF8,CXXC4
gene_set_query	491	IKZF5	544	ARCHS4 Coexpression,1183;Enrichr Queries,223;GTEx Coexpression,226	SMAD4,KMT2A,RFX7,ZBTB10,BPTF
gene_set_query	492	ZNF714	545.7	ARCHS4 Coexpression,194;Enrichr Queries,1225;GTEx Coexpression,218	TCF20,ZNF8,BPTF
gene_set_query	493	ZNF711	546	ARCHS4 Coexpression,77;Enrichr Queries,334;GTEx Coexpression,1227	SPEN,SETBP1,ZBTB10,TCF4
gene_set_query	494	NFIC	546	ARCHS4 Coexpression,1468;ENCODE ChIP-seq,59;Enrichr Queries,661;ReMap ChIP-seq,121;GTEx Coexpression,421	SPEN,SMAD4,ZZZ3,SETDB1,ZNF507,PRDM1
gene_set_query	495	EEA1	546.3	ARCHS4 Coexpression,326;Enrichr Queries,1061;GTEx Coexpression,252	ZZZ3,RFX7,BPTF
gene_set_query	496	MYBL2	546.7	Literature ChIP-seq,119;ARCHS4 Coexpression,1104;ENCODE ChIP-seq,102;Enrichr Queries,1043;ReMap ChIP-seq,78;GTEx Coexpression,834	SPEN,SETDB1,ZBTB10,TCF4,NRF1
gene_set_query	497	ZNF462	548.3	ARCHS4 Coexpression,318;Enrichr Queries,426;GTEx Coexpression,901	SETBP1,BPTF
gene_set_query	498	ZNF850	548.5	ARCHS4 Coexpression,311;GTEx Coexpression,786	ZNF8
gene_set_query	499	NCOA3	548.8	ARCHS4 Coexpression,132;Enrichr Queries,1341;ReMap ChIP-seq,13;GTEx Coexpression,709	SETDB1,XPA,ESR1,BPTF
gene_set_query	500	TP53	548.8	Literature ChIP-seq,78;ARCHS4 Coexpression,938;Enrichr Queries,314;ReMap ChIP-seq,129;GTEx Coexpression,1285	SMAD4,RFX7,PRDM1,ESR1
gene_set_query	501	ZNF404	549.7	ARCHS4 Coexpression,360;Enrichr Queries,605;GTEx Coexpression,684	ZNF83,TCF4,CXXC4
gene_set_query	502	NFATC1	550	ARCHS4 Coexpression,1136;ENCODE ChIP-seq,38;Enrichr Queries,713;ReMap ChIP-seq,81;GTEx Coexpression,782	ZNF584,SPEN,ZZZ3,SETDB1,PRDM1,ZNF8,CXXC4
gene_set_query	503	ZMAT1	551.3	ARCHS4 Coexpression,155;Enrichr Queries,1021;GTEx Coexpression,478	ZNF83,ASH1L,BPTF
gene_set_query	504	YBX3	552	ARCHS4 Coexpression,717;GTEx Coexpression,387	MYOD1
gene_set_query	505	ZNF101	553	ARCHS4 Coexpression,337;Enrichr Queries,537;GTEx Coexpression,785	PRDM1,ZNF8
gene_set_query	506	GTF2I	554	ARCHS4 Coexpression,554	TCF20
gene_set_query	507	HES2	556	ARCHS4 Coexpression,184;Enrichr Queries,860;GTEx Coexpression,624	PRDM1,ZNF8,TP63
gene_set_query	508	FOXC1	556.7	ARCHS4 Coexpression,571;Enrichr Queries,789;GTEx Coexpression,310	SPEN,ZBTB10,PRDM1
gene_set_query	509	GTF2B	556.8	ARCHS4 Coexpression,1312;ENCODE ChIP-seq,98;ReMap ChIP-seq,76;GTEx Coexpression,741	ZNF584,SPEN,SETDB1,ZNF507
gene_set_query	510	ZNF91	557.7	ARCHS4 Coexpression,388;Enrichr Queries,164;GTEx Coexpression,1121	SETBP1,ZNF83,TCF4,BPTF
gene_set_query	511	E2F4	558.3	Literature ChIP-seq,38;ARCHS4 Coexpression,688;ENCODE ChIP-seq,76;Enrichr Queries,880;ReMap ChIP-seq,178;GTEx Coexpression,1490	SPEN,SMAD4,SETDB1,KMT2A,XPA,ARID2
gene_set_query	512	ZNF501	559.3	ARCHS4 Coexpression,253;Enrichr Queries,1022;GTEx Coexpression,403	ZZZ3,PRDM5
gene_set_query	513	ZNF429	559.7	ARCHS4 Coexpression,440;Enrichr Queries,488;GTEx Coexpression,751	SETBP1,ZNF83,PRDM5
gene_set_query	514	POU4F3	560.3	ARCHS4 Coexpression,1054;Enrichr Queries,249;GTEx Coexpression,378	SPEN,MYOD1,ESR1
gene_set_query	515	ZNF483	560.7	ARCHS4 Coexpression,516;Enrichr Queries,1044;GTEx Coexpression,122	MECP2,KMT2A,ZNF83,ZNF8
gene_set_query	516	ZNF646	560.7	ARCHS4 Coexpression,567;Enrichr Queries,182;GTEx Coexpression,933	SPEN,KMT2A,TCF20,BPTF
gene_set_query	517	POU2F2	561.2	ARCHS4 Coexpression,890;ENCODE ChIP-seq,87;Enrichr Queries,956;ReMap ChIP-seq,156;GTEx Coexpression,717	ZNF584,SMAD4,PRDM1,CXXC4
gene_set_query	518	NKX21	561.5	ARCHS4 Coexpression,445;GTEx Coexpression,678	SMAD9,CXXC4
gene_set_query	519	ZNF687	561.7	ARCHS4 Coexpression,1089;Enrichr Queries,90;GTEx Coexpression,506	SPEN,SETDB1,KMT2A,ASH1L,BPTF
gene_set_query	520	AIRE	562.7	ARCHS4 Coexpression,720;Enrichr Queries,622;GTEx Coexpression,346	PRDM1,CXXC4
gene_set_query	521	ONECUT1	564.8	ARCHS4 Coexpression,948;Enrichr Queries,301;ReMap ChIP-seq,1;GTEx Coexpression,1009	KMT2A,ZNF507,XPA,PRDM1,ARID2,CXXC4,ESR1
gene_set_query	522	BARX2	565	ARCHS4 Coexpression,560;Enrichr Queries,431;GTEx Coexpression,704	PRDM1,ESR1,TP63
gene_set_query	523	TBP	565.4	Literature ChIP-seq,114;ARCHS4 Coexpression,1467;ENCODE ChIP-seq,75;ReMap ChIP-seq,89;GTEx Coexpression,1082	ZNF584,SPEN,ZNF507,XPA,TCF4,ARID2
gene_set_query	524	RARB	565.5	Literature ChIP-seq,61;ARCHS4 Coexpression,1261;Enrichr Queries,579;GTEx Coexpression,361	SETDB1,ZBTB10,SMAD9,TCF20,ASH1L,ESR1
gene_set_query	525	ZNF17	565.7	ARCHS4 Coexpression,1568;Enrichr Queries,107;GTEx Coexpression,22	ZNF584,SMAD4,ZZZ3,ZNF507,ZNF83,ASH1L
gene_set_query	526	ZNF496	565.7	ARCHS4 Coexpression,657;Enrichr Queries,1019;GTEx Coexpression,21	SMAD4,SETDB1,ZNF83,ZNF507,PRDM5,TCF20
gene_set_query	527	ZNF229	566.5	ARCHS4 Coexpression,215;Enrichr Queries,918	ZNF83,TCF4
gene_set_query	528	ZBTB5	567.3	ARCHS4 Coexpression,219;Enrichr Queries,1218;GTEx Coexpression,265	TCF20,PRDM1,TP63
gene_set_query	529	ZNF519	568	ARCHS4 Coexpression,100;Enrichr Queries,1326;GTEx Coexpression,278	KMT2A,PRDM5,ZNF8,BPTF
gene_set_query	530	ZNF266	568.3	ARCHS4 Coexpression,246;Enrichr Queries,562;GTEx Coexpression,897	ZNF83,ARID2
gene_set_query	531	TERF2	569.3	ARCHS4 Coexpression,338;Enrichr Queries,765;ReMap ChIP-seq,263;GTEx Coexpression,911	ZNF8,BPTF
gene_set_query	532	GPBP1	569.5	ARCHS4 Coexpression,373;GTEx Coexpression,766	ARID2
gene_set_query	533	UBP1	569.7	ARCHS4 Coexpression,574;Enrichr Queries,915;GTEx Coexpression,220	KMT2A,SETBP1,TCF20,BPTF
gene_set_query	534	RFX4	569.7	ARCHS4 Coexpression,154;Enrichr Queries,640;GTEx Coexpression,915	TCF4,ESR1,CXXC4
gene_set_query	535	CEBPZ	570.2	ARCHS4 Coexpression,878;ENCODE ChIP-seq,110;Enrichr Queries,1050;ReMap ChIP-seq,110;GTEx Coexpression,703	ZNF584,ZNF507
gene_set_query	536	MAFK	571.2	ARCHS4 Coexpression,1345;ENCODE ChIP-seq,47;Enrichr Queries,1183;ReMap ChIP-seq,71;GTEx Coexpression,210	SPEN,SETBP1,ZBTB10,PRDM1,ESR1
gene_set_query	537	ASCL2	572.3	ARCHS4 Coexpression,776;Enrichr Queries,492;GTEx Coexpression,449	PRDM1,ESR1,TP63
gene_set_query	538	DLX5	573.3	ARCHS4 Coexpression,442;Enrichr Queries,639;GTEx Coexpression,639	TCF4,PRDM1,TP63
gene_set_query	539	RBPJ	573.6	Literature ChIP-seq,42;ARCHS4 Coexpression,257;Enrichr Queries,858;ReMap ChIP-seq,184;GTEx Coexpression,1527	SPEN,KMT2A,RFX7,ZBTB10,TCF20,PRDM1
gene_set_query	540	ZFP1	574.3	ARCHS4 Coexpression,310;Enrichr Queries,193;GTEx Coexpression,1220	ZZZ3,ZBTB10,TCF4,BPTF
gene_set_query	541	TAL1	574.5	Literature ChIP-seq,118;ARCHS4 Coexpression,1454;ENCODE ChIP-seq,73;Enrichr Queries,444;ReMap ChIP-seq,199;GTEx Coexpression,1159	KMT2A,SETDB1,PRDM1,NRF1,ZNF8,ESR1
gene_set_query	542	MYOD1	574.6	ARCHS4 Coexpression,746;ENCODE ChIP-seq,27;Enrichr Queries,600;ReMap ChIP-seq,131;GTEx Coexpression,1369	MECP2,SPEN,ZZZ3,RFX7,MYOD1,XPA,PRDM1,ESR1
gene_set_query	543	ATF4	574.8	ARCHS4 Coexpression,735;Enrichr Queries,1099;ReMap ChIP-seq,281;GTEx Coexpression,184	SMAD4,SETBP1
gene_set_query	544	ZNF552	575.3	ARCHS4 Coexpression,71;Enrichr Queries,494;GTEx Coexpression,1161	PRDM1,ZNF8,ESR1
gene_set_query	545	IKZF1	575.5	Literature ChIP-seq,153;ARCHS4 Coexpression,1197;ENCODE ChIP-seq,15;Enrichr Queries,933;ReMap ChIP-seq,215;GTEx Coexpression,940	SETBP1,ZNF83,PRDM1,ASH1L,ESR1,TP63
gene_set_query	546	ZNF680	576	ARCHS4 Coexpression,38;Enrichr Queries,448;GTEx Coexpression,1242	ZZZ3,ZNF83,ZBTB10,TCF4,ARID2
gene_set_query	547	USF1	576.6	ARCHS4 Coexpression,752;ENCODE ChIP-seq,58;Enrichr Queries,904;ReMap ChIP-seq,241;GTEx Coexpression,928	ZZZ3,ZNF507,PRDM1,BPTF
gene_set_query	548	TSHZ3	577.3	ARCHS4 Coexpression,1368;Enrichr Queries,288;GTEx Coexpression,76	SMAD4,SETBP1,PRDM5,PRDM1
gene_set_query	549	POU3F1	577.5	Literature ChIP-seq,69;ARCHS4 Coexpression,1040;Enrichr Queries,566;GTEx Coexpression,635	RFX7,TCF4,PRDM1,ESR1,TP63,BPTF
gene_set_query	550	HIF3A	578	ARCHS4 Coexpression,630;Enrichr Queries,686;GTEx Coexpression,418	SMAD4,TCF20,PRDM1
gene_set_query	551	ZNF420	578	ARCHS4 Coexpression,1463;Enrichr Queries,28;GTEx Coexpression,243	SMAD4,ZZZ3,ZNF507,ZNF83,ZBTB10,ASH1L,ARID2
gene_set_query	552	ALX1	578	ARCHS4 Coexpression,722;Enrichr Queries,595;GTEx Coexpression,417	ZZZ3,PRDM1
gene_set_query	553	ZNF382	580	ARCHS4 Coexpression,437;Enrichr Queries,328;GTEx Coexpression,975	ZNF83,ZBTB10,ZNF8
gene_set_query	554	AHR	580	Literature ChIP-seq,20;ARCHS4 Coexpression,947;Enrichr Queries,772;ReMap ChIP-seq,69;GTEx Coexpression,1092	KMT2A,PRDM1,ARID2,ESR1
gene_set_query	555	ZFY	582	ARCHS4 Coexpression,1001;Enrichr Queries,261;GTEx Coexpression,484	SETBP1,ZNF507,PRDM1
gene_set_query	556	HOXC13	582	ARCHS4 Coexpression,624;Enrichr Queries,606;GTEx Coexpression,516	PRDM1,ESR1,TP63
gene_set_query	557	ZNF232	582.3	ARCHS4 Coexpression,1014;Enrichr Queries,594;GTEx Coexpression,139	SMAD4,SETDB1,ZNF507,PRDM1
gene_set_query	558	TAL2	584	ARCHS4 Coexpression,353;Enrichr Queries,430;GTEx Coexpression,969	PRDM1,ARID2,CXXC4
gene_set_query	559	ZNF544	584.7	ARCHS4 Coexpression,420;Enrichr Queries,871;GTEx Coexpression,463	ZNF83,TCF20,ZNF8
gene_set_query	560	HMX3	585	ARCHS4 Coexpression,795;Enrichr Queries,255;GTEx Coexpression,705	MYOD1,PRDM1
gene_set_query	561	GMEB1	587	ARCHS4 Coexpression,423;Enrichr Queries,207;GTEx Coexpression,1131	SPEN,ZZZ3,ARID2,ZNF8
gene_set_query	562	ZNF529	587.3	ARCHS4 Coexpression,350;Enrichr Queries,133;GTEx Coexpression,1279	ZNF83,ZNF507,RFX7,ZBTB10,ZNF8
gene_set_query	563	ZBTB1	587.7	ARCHS4 Coexpression,1346;Enrichr Queries,220;GTEx Coexpression,197	REST,ZZZ3,PRDM1,ARID2,BPTF
gene_set_query	564	EOMES	588.8	Literature ChIP-seq,84;ARCHS4 Coexpression,1073;Enrichr Queries,744;ReMap ChIP-seq,7;GTEx Coexpression,1036	SMAD4,SETBP1,PRDM5,TCF20,PRDM1,NRF1,CXXC4
gene_set_query	565	ZFP37	589.3	ARCHS4 Coexpression,193;Enrichr Queries,1347;GTEx Coexpression,228	KMT2A,TCF4,ASH1L
gene_set_query	566	DMRT1	590	Literature ChIP-seq,41;ARCHS4 Coexpression,868;Enrichr Queries,272;GTEx Coexpression,1179	SPEN,ZZZ3,TCF4,PRDM1,ESR1,BPTF
gene_set_query	567	JAZF1	590.7	ARCHS4 Coexpression,1267;Enrichr Queries,358;GTEx Coexpression,147	MECP2,SETBP1,PRDM1
gene_set_query	568	ESRRB	591.3	Literature ChIP-seq,139;ARCHS4 Coexpression,1065;Enrichr Queries,323;GTEx Coexpression,838	PRDM1,ESR1
gene_set_query	569	USF2	592.4	ARCHS4 Coexpression,1292;ENCODE ChIP-seq,54;Enrichr Queries,1129;ReMap ChIP-seq,169;GTEx Coexpression,318	REST,ZZZ3,SETDB1,ZNF507,BPTF
gene_set_query	570	LYL1	592.4	Literature ChIP-seq,143;ARCHS4 Coexpression,700;Enrichr Queries,987;ReMap ChIP-seq,247;GTEx Coexpression,885
gene_set_query	571	ONECUT3	593	ARCHS4 Coexpression,458;Enrichr Queries,322;GTEx Coexpression,999	PRDM1,ZNF8,ESR1
gene_set_query	572	HEY2	593	ARCHS4 Coexpression,857;Enrichr Queries,754;GTEx Coexpression,168	SETBP1,ZBTB10,PRDM1
gene_set_query	573	STAT1	593.2	Literature ChIP-seq,109;ARCHS4 Coexpression,1099;ENCODE ChIP-seq,78;Enrichr Queries,1229;ReMap ChIP-seq,83;GTEx Coexpression,961	SPEN,ZZZ3,SETDB1,PRDM1,NRF1,BPTF
gene_set_query	574	ZNF425	594.7	ARCHS4 Coexpression,301;Enrichr Queries,864;GTEx Coexpression,619	ASH1L,PRDM1,ZNF8
gene_set_query	575	ZNF571	595	ARCHS4 Coexpression,1228;Enrichr Queries,453;GTEx Coexpression,104	KMT2A,ZNF83,ZBTB10
gene_set_query	576	ATF1	595.2	ARCHS4 Coexpression,1425;ENCODE ChIP-seq,95;Enrichr Queries,244;ReMap ChIP-seq,135;GTEx Coexpression,1077	ZNF584,SPEN,SMAD4,ZZZ3,SETDB1,ZNF83
gene_set_query	577	MXI1	596.4	ARCHS4 Coexpression,1421;ENCODE ChIP-seq,55;Enrichr Queries,1244;ReMap ChIP-seq,192;GTEx Coexpression,70	MECP2,ZNF584,SMAD4,PRDM5,XPA,ZBTB10,SMAD9,ARID2
gene_set_query	578	ZNF587	597	ARCHS4 Coexpression,379;Enrichr Queries,14;GTEx Coexpression,1398	SPEN,KMT2A,ZNF83,ASH1L,ZNF8,ARID2,BPTF
gene_set_query	579	HOXB4	597	Literature ChIP-seq,81;ARCHS4 Coexpression,490;Enrichr Queries,843;GTEx Coexpression,974	SPEN,REST,ZZZ3,PRDM1,NRF1
gene_set_query	580	MNX1	598	Literature ChIP-seq,136;ARCHS4 Coexpression,802;Enrichr Queries,563;GTEx Coexpression,891	PRDM1,BPTF
gene_set_query	581	AKAP8	598.7	ARCHS4 Coexpression,597;Enrichr Queries,961;GTEx Coexpression,238	SPEN,SMAD4,SETDB1
gene_set_query	582	ZNF749	598.7	ARCHS4 Coexpression,1195;Enrichr Queries,203;GTEx Coexpression,398	ZNF584,ZNF507,ZNF8
gene_set_query	583	CEBPB	599.2	Literature ChIP-seq,39;ARCHS4 Coexpression,1118;ENCODE ChIP-seq,9;Enrichr Queries,1191;ReMap ChIP-seq,139;GTEx Coexpression,1099	SPEN,ZZZ3,SETDB1,ZBTB10,XPA,ASH1L,ARID2
gene_set_query	584	ARID3A	600	ARCHS4 Coexpression,914;ENCODE ChIP-seq,106;Enrichr Queries,851;ReMap ChIP-seq,74;GTEx Coexpression,1055	SPEN,KMT2A,ZNF83,PRDM1
gene_set_query	585	BRF2	600	ARCHS4 Coexpression,1043;ReMap ChIP-seq,18;GTEx Coexpression,739	ZNF584,REST,RFX7
gene_set_query	586	CREM	600.2	Literature ChIP-seq,97;ARCHS4 Coexpression,662;Enrichr Queries,659;ReMap ChIP-seq,136;GTEx Coexpression,1447	SPEN,SMAD4,REST,ZZZ3,SETBP1,RFX7,XPA,TCF20,PRDM1
gene_set_query	587	DOT1L	600.3	ARCHS4 Coexpression,555;Enrichr Queries,139;GTEx Coexpression,1107	SPEN,KMT2A,RFX7,ASH1L
gene_set_query	588	MTF2	600.7	Literature ChIP-seq,104;ARCHS4 Coexpression,1512;GTEx Coexpression,186	SPEN,MYOD1,SMAD9,ARID2,CXXC4,BPTF
gene_set_query	589	ZNF416	601.7	ARCHS4 Coexpression,1332;Enrichr Queries,386;GTEx Coexpression,87	ZNF584,RFX7,ZNF83,ZNF8,TP63
gene_set_query	590	HNF4G	602.8	ARCHS4 Coexpression,907;ENCODE ChIP-seq,113;Enrichr Queries,404;ReMap ChIP-seq,233;GTEx Coexpression,1357	PRDM1,ESR1
gene_set_query	591	SP8	603.7	ARCHS4 Coexpression,670;Enrichr Queries,610;GTEx Coexpression,531	PRDM1,CXXC4,TP63
gene_set_query	592	ZNF770	604.3	ARCHS4 Coexpression,1239;Enrichr Queries,307;GTEx Coexpression,267	RFX7,TP63,BPTF
gene_set_query	593	IKZF2	605.3	ARCHS4 Coexpression,484;Enrichr Queries,510;GTEx Coexpression,822	SETBP1,TCF20,PRDM1
gene_set_query	594	NFE2	606	ARCHS4 Coexpression,846;ENCODE ChIP-seq,11;Enrichr Queries,955;ReMap ChIP-seq,201;GTEx Coexpression,1017	SPEN,ZZZ3,ZNF507,PRDM1
gene_set_query	595	PPARD	606	Literature ChIP-seq,79;ARCHS4 Coexpression,1404;Enrichr Queries,385;GTEx Coexpression,556	PRDM5,ZBTB10,TCF4,PRDM1,ESR1,CXXC4,BPTF
gene_set_query	596	ANHX	606	ARCHS4 Coexpression,481;GTEx Coexpression,731	REST
gene_set_query	597	ZNF436	606.3	ARCHS4 Coexpression,663;Enrichr Queries,653;GTEx Coexpression,503	TCF4,PRDM1,TP63
gene_set_query	598	ZNF790	606.3	ARCHS4 Coexpression,661;Enrichr Queries,931;GTEx Coexpression,227	ZZZ3,ZNF507,ZNF83,ZNF8
gene_set_query	599	CENPX	607	GTEx Coexpression,607	PRDM5
gene_set_query	600	PAX7	607.3	ARCHS4 Coexpression,1167;Enrichr Queries,158;GTEx Coexpression,497	MYOD1,PRDM1,ESR1
gene_set_query	601	ZNF703	607.3	ARCHS4 Coexpression,465;Enrichr Queries,724;GTEx Coexpression,633	SPEN,MYOD1,PRDM1
gene_set_query	602	TBX1	607.3	ARCHS4 Coexpression,1130;Enrichr Queries,300;GTEx Coexpression,392	MYOD1,PRDM1,ESR1
gene_set_query	603	GCM1	607.7	ARCHS4 Coexpression,750;Enrichr Queries,285;GTEx Coexpression,788	PRDM1,ESR1
gene_set_query	604	HOXB7	608.6	Literature ChIP-seq,13;ARCHS4 Coexpression,1180;Enrichr Queries,777;ReMap ChIP-seq,36;GTEx Coexpression,1037	ZNF584,MECP2,SPEN,REST,SETDB1,ZNF83,PRDM1,TP63,BPTF
gene_set_query	605	FOXQ1	609	ARCHS4 Coexpression,513;Enrichr Queries,867;GTEx Coexpression,447	PRDM1,TP63
gene_set_query	606	ZNF92	610.5	ARCHS4 Coexpression,1275;Enrichr Queries,197;ReMap ChIP-seq,104;GTEx Coexpression,866	ZZZ3,ZNF507,ZBTB10,TCF20
gene_set_query	607	ZNF107	611.3	ARCHS4 Coexpression,90;Enrichr Queries,396;GTEx Coexpression,1348	ZNF83,ARID2,BPTF
gene_set_query	608	MAX	611.4	ARCHS4 Coexpression,1557;ENCODE ChIP-seq,33;Enrichr Queries,211;ReMap ChIP-seq,216;GTEx Coexpression,1040	ZNF584,SMAD4,SETDB1,PRDM1,NRF1,ESR1
gene_set_query	609	MEF2B	612	ARCHS4 Coexpression,712;Enrichr Queries,406;ReMap ChIP-seq,194;GTEx Coexpression,1136	SPEN,PRDM1,ESR1
gene_set_query	610	FOS	612.6	ARCHS4 Coexpression,1174;ENCODE ChIP-seq,48;Enrichr Queries,1163;ReMap ChIP-seq,226;GTEx Coexpression,452	KMT2A,ZNF507,ZNF8,TP63
gene_set_query	611	HELT	612.7	ARCHS4 Coexpression,915;Enrichr Queries,251;GTEx Coexpression,672	MYOD1,ESR1,TP63
gene_set_query	612	ZNF442	612.7	ARCHS4 Coexpression,245;Enrichr Queries,1246;GTEx Coexpression,347	ZBTB10,ZNF8
gene_set_query	613	ZNF208	614.3	ARCHS4 Coexpression,467;Enrichr Queries,1039;GTEx Coexpression,337	SMAD9,ZNF8
gene_set_query	614	HOXB1	614.7	ARCHS4 Coexpression,854;Enrichr Queries,316;GTEx Coexpression,674	PRDM1,ESR1,TP63
gene_set_query	615	NFKB1	615.3	ARCHS4 Coexpression,1120;Enrichr Queries,210;ReMap ChIP-seq,85;GTEx Coexpression,1046	SMAD4,KMT2A,SETBP1,PRDM1,ESR1
gene_set_query	616	RARG	616	Literature ChIP-seq,149;ARCHS4 Coexpression,1006;Enrichr Queries,783;GTEx Coexpression,526	PRDM1,TP63
gene_set_query	617	IRX4	618.7	ARCHS4 Coexpression,586;Enrichr Queries,716;GTEx Coexpression,554	PRDM1,TP63
gene_set_query	618	ZNF221	619.3	ARCHS4 Coexpression,280;Enrichr Queries,400;GTEx Coexpression,1178	SETBP1,ZNF83,ZNF8
gene_set_query	619	HOXC9	620	Literature ChIP-seq,127;ARCHS4 Coexpression,495;Enrichr Queries,1214;GTEx Coexpression,644	ZZZ3,SETDB1,MYOD1,ESR1
gene_set_query	620	ZNF763	620	ARCHS4 Coexpression,926;Enrichr Queries,483;GTEx Coexpression,451	SETDB1,SETBP1,ZNF83
gene_set_query	621	ZNF14	620.3	ARCHS4 Coexpression,327;Enrichr Queries,1382;GTEx Coexpression,152	KMT2A,TCF4,BPTF
gene_set_query	622	ZBTB16	620.5	ARCHS4 Coexpression,829;Enrichr Queries,1330;ReMap ChIP-seq,284;GTEx Coexpression,39	SPEN,SMAD4,SETBP1,ASH1L
gene_set_query	623	HSFY1	621	ARCHS4 Coexpression,774;GTEx Coexpression,468	CXXC4
gene_set_query	624	ZXDC	621	ARCHS4 Coexpression,1171;Enrichr Queries,219;GTEx Coexpression,473	SPEN,SETDB1,KMT2A,ZBTB10
gene_set_query	625	MYCN	621.2	Literature ChIP-seq,71;ARCHS4 Coexpression,1152;Enrichr Queries,332;ReMap ChIP-seq,161;GTEx Coexpression,1390	ZNF584,MYOD1,PRDM1,ESR1
gene_set_query	626	ZNF629	621.7	ARCHS4 Coexpression,952;Enrichr Queries,709;GTEx Coexpression,204	ZNF584,SPEN,ASH1L
gene_set_query	627	ZHX2	621.8	ARCHS4 Coexpression,1138;Enrichr Queries,500;ReMap ChIP-seq,256;GTEx Coexpression,593	SETBP1,NRF1,PRDM1
gene_set_query	628	ZNF140	622.3	ARCHS4 Coexpression,1509;Enrichr Queries,62;GTEx Coexpression,296	SMAD4,ZZZ3,ZNF83,ZBTB10,ARID2
gene_set_query	629	ZNF146	622.3	ARCHS4 Coexpression,725;Enrichr Queries,735;GTEx Coexpression,407	ZZZ3
gene_set_query	630	ETS1	623.2	Literature ChIP-seq,113;ARCHS4 Coexpression,1450;ENCODE ChIP-seq,50;Enrichr Queries,778;ReMap ChIP-seq,167;GTEx Coexpression,1181	ZNF584,ZZZ3,SETDB1,PRDM1
gene_set_query	631	HOXB3	623.3	ARCHS4 Coexpression,611;Enrichr Queries,318;GTEx Coexpression,941	SPEN,PRDM1,ESR1
gene_set_query	632	ZNF546	623.3	ARCHS4 Coexpression,394;Enrichr Queries,239;GTEx Coexpression,1237	SETBP1,ZNF507,ZNF8,ESR1
gene_set_query	633	EHF	623.8	ARCHS4 Coexpression,633;Enrichr Queries,869;ReMap ChIP-seq,293;GTEx Coexpression,700	PRDM1,TP63
gene_set_query	634	GLYR1	625	ARCHS4 Coexpression,1204;ReMap ChIP-seq,45;GTEx Coexpression,626	SETDB1,XPA,ASH1L
gene_set_query	635	ZNF589	625.5	ARCHS4 Coexpression,499;Enrichr Queries,701;ReMap ChIP-seq,287;GTEx Coexpression,1015	PRDM1,BPTF
gene_set_query	636	PITX1	625.7	ARCHS4 Coexpression,875;Enrichr Queries,423;GTEx Coexpression,579	PRDM1,ESR1
gene_set_query	637	ZNF772	625.7	ARCHS4 Coexpression,278;Enrichr Queries,502;GTEx Coexpression,1097	ZNF83,ZBTB10,ZNF8
gene_set_query	638	PHF21A	626	ARCHS4 Coexpression,1030;Enrichr Queries,47;GTEx Coexpression,801	SPEN,KMT2A,SETBP1,RFX7,ASH1L,BPTF
gene_set_query	639	PAX8	626.5	ARCHS4 Coexpression,1240;Enrichr Queries,489;ReMap ChIP-seq,148;GTEx Coexpression,629	SPEN,SMAD9,PRDM1,ESR1
gene_set_query	640	TFAP4	626.8	ARCHS4 Coexpression,352;Enrichr Queries,1070;ReMap ChIP-seq,211;GTEx Coexpression,874	ZNF8
gene_set_query	641	BACH1	627.2	Literature ChIP-seq,75;ARCHS4 Coexpression,1377;ENCODE ChIP-seq,71;Enrichr Queries,714;ReMap ChIP-seq,32;GTEx Coexpression,1494	ZNF584,SPEN,PRDM5,PRDM1,NRF1,ZNF8,ESR1
gene_set_query	642	TCF4	627.2	Literature ChIP-seq,15;ARCHS4 Coexpression,1265;Enrichr Queries,395;ReMap ChIP-seq,98;GTEx Coexpression,1363	ZNF584,SMAD4,XPA,ZBTB10,TCF20,NRF1,ESR1,REST,SETBP1,ZNF507,RFX7,ARID2,BPTF
gene_set_query	643	SREBF1	627.7	Literature ChIP-seq,68;ARCHS4 Coexpression,1122;ENCODE ChIP-seq,70;Enrichr Queries,865;ReMap ChIP-seq,155;GTEx Coexpression,1486	ZNF584,ZZZ3,RFX7,ESR1
gene_set_query	644	ZNF726	628	ARCHS4 Coexpression,228;GTEx Coexpression,1028	ZNF8
gene_set_query	645	ZNF846	628	ARCHS4 Coexpression,678;Enrichr Queries,416;GTEx Coexpression,790	ZNF83,PRDM1
gene_set_query	646	ZNF623	629	ARCHS4 Coexpression,594;Enrichr Queries,942;GTEx Coexpression,351	ZZZ3,ZNF8,BPTF
gene_set_query	647	CBX2	629.2	ARCHS4 Coexpression,1173;ENCODE ChIP-seq,28;Enrichr Queries,1072;ReMap ChIP-seq,101;GTEx Coexpression,772	REST,SMAD9,NRF1,PRDM1,CXXC4
gene_set_query	648	PKNOX1	629.5	ARCHS4 Coexpression,669;Enrichr Queries,450;ReMap ChIP-seq,274;GTEx Coexpression,1125	SMAD4,PRDM1,ZNF8
gene_set_query	649	RUNX3	630	ARCHS4 Coexpression,1061;ENCODE ChIP-seq,43;Enrichr Queries,966;ReMap ChIP-seq,23;GTEx Coexpression,1057	SPEN,SETDB1,ZNF83,PRDM1,NRF1,TP63
gene_set_query	650	ZNF780A	630	ARCHS4 Coexpression,351;Enrichr Queries,311;GTEx Coexpression,1228	ZNF507,PRDM5,ZBTB10
gene_set_query	651	HOXD12	630	ARCHS4 Coexpression,1471;Enrichr Queries,145;GTEx Coexpression,274	SETBP1,MYOD1,PRDM1,ESR1
gene_set_query	652	ZNF175	632.3	ARCHS4 Coexpression,1354;Enrichr Queries,803;ReMap ChIP-seq,259;GTEx Coexpression,113	KMT2A,ZNF507,PRDM1,BPTF
gene_set_query	653	ZNF143	632.8	ARCHS4 Coexpression,1508;ENCODE ChIP-seq,32;Enrichr Queries,362;ReMap ChIP-seq,183;GTEx Coexpression,1079	ZNF584,REST,SMAD4,SETDB1,ZNF83,PRDM5,PRDM1
gene_set_query	654	ZNF572	633	ARCHS4 Coexpression,672;Enrichr Queries,1079;GTEx Coexpression,148	REST,ZZZ3,ESR1
gene_set_query	655	ZSCAN10	633	ARCHS4 Coexpression,894;Enrichr Queries,728;GTEx Coexpression,277	MYOD1,NRF1,PRDM1
gene_set_query	656	BSX	633.3	ARCHS4 Coexpression,1177;Enrichr Queries,253;GTEx Coexpression,470	MYOD1,CXXC4,ESR1
gene_set_query	657	ZNF287	636.3	ARCHS4 Coexpression,1313;Enrichr Queries,401;GTEx Coexpression,195	ZNF584,ZZZ3,ZBTB10,PRDM1
gene_set_query	658	ZNF273	636.7	ARCHS4 Coexpression,422;Enrichr Queries,954;GTEx Coexpression,534	ZNF83,ZNF8,TP63
gene_set_query	659	ZNF160	637	ARCHS4 Coexpression,769;Enrichr Queries,656;GTEx Coexpression,486	ZNF83
gene_set_query	660	ZBTB42	638	ARCHS4 Coexpression,522;GTEx Coexpression,754	ESR1
gene_set_query	661	TMF1	639.5	ARCHS4 Coexpression,991;GTEx Coexpression,288	ARID2
gene_set_query	662	TCF7	640.2	Literature ChIP-seq,80;ARCHS4 Coexpression,1270;Enrichr Queries,920;ReMap ChIP-seq,54;GTEx Coexpression,877	RFX7,ZBTB10,PRDM1,NRF1,ARID2,TP63
gene_set_query	663	ZNF584	642	ARCHS4 Coexpression,549;Enrichr Queries,959;ReMap ChIP-seq,280;GTEx Coexpression,780	SETBP1,ZNF8
gene_set_query	664	ZNF585B	642.3	ARCHS4 Coexpression,1077;Enrichr Queries,809;GTEx Coexpression,41	MECP2,KMT2A,ZNF83,SMAD9
gene_set_query	665	ZNF449	642.7	ARCHS4 Coexpression,1603;Enrichr Queries,213;GTEx Coexpression,112	SMAD4,ZNF83,PRDM5,XPA,ZBTB10,BPTF
gene_set_query	666	ZBTB21	643.5	ARCHS4 Coexpression,23;GTEx Coexpression,1264	SPEN,KMT2A,ZBTB10,TCF20
gene_set_query	667	USF3	644	ARCHS4 Coexpression,50;GTEx Coexpression,1238	KMT2A,ASH1L,BPTF
gene_set_query	668	ZNF700	644.3	ARCHS4 Coexpression,81;Enrichr Queries,480;GTEx Coexpression,1372	ZNF83,RFX7,ARID2
gene_set_query	669	XBP1	644.5	ARCHS4 Coexpression,546;Enrichr Queries,1178;ReMap ChIP-seq,61;GTEx Coexpression,793	ZNF584,ZNF507,ESR1
gene_set_query	670	L3MBTL1	645	ARCHS4 Coexpression,403;GTEx Coexpression,887	ZNF8
gene_set_query	671	PRDM9	645.3	ARCHS4 Coexpression,129;Enrichr Queries,493;GTEx Coexpression,1314	SPEN,ZBTB10,PRDM1,ESR1
gene_set_query	672	FIGLA	645.3	ARCHS4 Coexpression,1311;Enrichr Queries,150;GTEx Coexpression,475	MYOD1,PRDM5,PRDM1,ESR1
gene_set_query	673	SOX5	645.7	ARCHS4 Coexpression,143;Enrichr Queries,189;GTEx Coexpression,1605	SETBP1,KMT2A,TCF4,PRDM1,ESR1
gene_set_query	674	ZKSCAN4	646.3	ARCHS4 Coexpression,770;Enrichr Queries,753;GTEx Coexpression,416	SETDB1,PRDM1
gene_set_query	675	ZKSCAN7	646.5	ARCHS4 Coexpression,874;GTEx Coexpression,419	PRDM5
gene_set_query	676	STAT2	647	ARCHS4 Coexpression,1160;ENCODE ChIP-seq,116;Enrichr Queries,1368;ReMap ChIP-seq,269;GTEx Coexpression,322	ZNF83
gene_set_query	677	MAFB	648.3	ARCHS4 Coexpression,1057;Enrichr Queries,795;ReMap ChIP-seq,182;GTEx Coexpression,559	SPEN,PRDM1,TP63
gene_set_query	678	TLX1	649.3	ARCHS4 Coexpression,929;Enrichr Queries,151;GTEx Coexpression,868	MYOD1,PRDM1,ESR1
gene_set_query	679	RFX5	650.4	ARCHS4 Coexpression,1020;ENCODE ChIP-seq,65;Enrichr Queries,994;ReMap ChIP-seq,90;GTEx Coexpression,1083	ZNF584,RFX7,ZNF8
gene_set_query	680	NR2E1	651	ARCHS4 Coexpression,203;Enrichr Queries,286;GTEx Coexpression,1464	TCF4,PRDM1,ESR1
gene_set_query	681	TBX15	651.3	ARCHS4 Coexpression,825;Enrichr Queries,671;GTEx Coexpression,458	MYOD1,PRDM1
gene_set_query	682	ZNF548	652.7	ARCHS4 Coexpression,405;Enrichr Queries,202;GTEx Coexpression,1351	ZNF83,ZBTB10,ZNF8,BPTF
gene_set_query	683	ZNF419	653	ARCHS4 Coexpression,356;Enrichr Queries,340;GTEx Coexpression,1263	ZNF83,ZNF8
gene_set_query	684	NR2C1	654	ARCHS4 Coexpression,1576;Enrichr Queries,123;GTEx Coexpression,263	SMAD4,ZNF507,ARID2,ESR1,BPTF
gene_set_query	685	SALL1	654.3	Literature ChIP-seq,157;ARCHS4 Coexpression,965;Enrichr Queries,677;GTEx Coexpression,818	PRDM1
gene_set_query	686	NR1I2	655	Literature ChIP-seq,25;ARCHS4 Coexpression,1141;Enrichr Queries,441;GTEx Coexpression,1013	SPEN,SETDB1,PRDM1,ESR1
gene_set_query	687	ZIC3	655	Literature ChIP-seq,150;ARCHS4 Coexpression,779;Enrichr Queries,723;GTEx Coexpression,968	PRDM1
gene_set_query	688	HOXA1	655.3	ARCHS4 Coexpression,731;Enrichr Queries,691;GTEx Coexpression,544	PRDM1
gene_set_query	689	LHX1	656.5	ARCHS4 Coexpression,740;Enrichr Queries,573	PRDM1
gene_set_query	690	ZNF227	656.7	ARCHS4 Coexpression,1477;Enrichr Queries,27;GTEx Coexpression,466	ZZZ3,ZNF83,ZNF507,RFX7,NRF1,PRDM1,BPTF
gene_set_query	691	ZNF667	656.7	ARCHS4 Coexpression,111;Enrichr Queries,1385;GTEx Coexpression,474	PRDM5,ZNF8,CXXC4
gene_set_query	692	MLXIP	657	ARCHS4 Coexpression,1224;Enrichr Queries,227;GTEx Coexpression,520	SPEN,SMAD4,KMT2A,BPTF
gene_set_query	693	ZNF800	657.7	ARCHS4 Coexpression,1479;Enrichr Queries,23;GTEx Coexpression,471	REST,ZZZ3,KMT2A,RFX7,ZBTB10,ASH1L,ARID2,BPTF
gene_set_query	694	IRF8	658.3	Literature ChIP-seq,145;ARCHS4 Coexpression,966;Enrichr Queries,603;GTEx Coexpression,919	PRDM1
gene_set_query	695	ZNF138	658.3	ARCHS4 Coexpression,1553;Enrichr Queries,172;GTEx Coexpression,250	RFX7,ZNF83,ZNF507,TP63,BPTF
gene_set_query	696	ZNF324B	659.5	ARCHS4 Coexpression,753;GTEx Coexpression,566	ZNF584
gene_set_query	697	ZBTB7A	660	ARCHS4 Coexpression,1475;ENCODE ChIP-seq,51;Enrichr Queries,440;ReMap ChIP-seq,238;GTEx Coexpression,1096	SPEN,KMT2A,SETDB1,ZNF507,RFX7,PRDM5
gene_set_query	698	ZNF71	660.3	ARCHS4 Coexpression,1063;Enrichr Queries,495;GTEx Coexpression,423	ZNF584,ZNF83,ZNF8
gene_set_query	699	ETV7	661	ARCHS4 Coexpression,765;Enrichr Queries,526;GTEx Coexpression,692	PRDM1,TP63
gene_set_query	700	KLF1	661.4	Literature ChIP-seq,92;ARCHS4 Coexpression,939;Enrichr Queries,988;ReMap ChIP-seq,229;GTEx Coexpression,1059	PRDM1,ARID2
gene_set_query	701	ZNF804B	662.7	ARCHS4 Coexpression,772;Enrichr Queries,655;GTEx Coexpression,561	SETBP1,SMAD9
gene_set_query	702	TCF7L1	664.3	ARCHS4 Coexpression,622;Enrichr Queries,1305;GTEx Coexpression,66	SMAD4,SETBP1,SMAD9,BPTF
gene_set_query	703	TERB1	665	ARCHS4 Coexpression,285;GTEx Coexpression,1045	ZNF8
gene_set_query	704	PURG	665	ARCHS4 Coexpression,297;GTEx Coexpression,1033	TCF4
gene_set_query	705	ZNF366	665	ARCHS4 Coexpression,979;Enrichr Queries,615;GTEx Coexpression,401	TCF4,PRDM1
gene_set_query	706	TFAP2D	665.3	ARCHS4 Coexpression,178;Enrichr Queries,296;GTEx Coexpression,1522	PRDM1,NRF1,ESR1,CXXC4
gene_set_query	707	NKX12	665.5	ARCHS4 Coexpression,1070;GTEx Coexpression,261	TCF20,TP63
gene_set_query	708	NR4A1	666.3	ARCHS4 Coexpression,1302;Enrichr Queries,1122;ReMap ChIP-seq,172;GTEx Coexpression,69	SPEN,ZNF83,PRDM5,ZBTB10
gene_set_query	709	ZNF432	667.7	ARCHS4 Coexpression,454;Enrichr Queries,747;GTEx Coexpression,802	ZNF83,ZNF8
gene_set_query	710	NR1H3	669	Literature ChIP-seq,144;ARCHS4 Coexpression,883;Enrichr Queries,1064;ReMap ChIP-seq,66;GTEx Coexpression,1188	SPEN,ARID2
gene_set_query	711	HOXA3	669	ARCHS4 Coexpression,943;Enrichr Queries,619;GTEx Coexpression,445	SETBP1,PRDM1
gene_set_query	712	AHDC1	669	ARCHS4 Coexpression,1554;Enrichr Queries,199;GTEx Coexpression,254	SPEN,RFX7,ASH1L,TP63
gene_set_query	713	ETS2	670.5	Literature ChIP-seq,152;ARCHS4 Coexpression,1153;Enrichr Queries,731;GTEx Coexpression,646	PRDM1,TP63
gene_set_query	714	ZNF732	671	ARCHS4 Coexpression,1105;GTEx Coexpression,237	KMT2A,ZNF83
gene_set_query	715	ZNF721	671.3	ARCHS4 Coexpression,260;Enrichr Queries,685;GTEx Coexpression,1069	BPTF
gene_set_query	716	THAP3	672	ARCHS4 Coexpression,533;Enrichr Queries,1104;GTEx Coexpression,379	TCF20,NRF1
gene_set_query	717	RFX1	672.5	ARCHS4 Coexpression,808;Enrichr Queries,467;ReMap ChIP-seq,145;GTEx Coexpression,1270	ZNF584,SPEN,KMT2A
gene_set_query	718	CASZ1	672.7	ARCHS4 Coexpression,937;Enrichr Queries,506;GTEx Coexpression,575	SETBP1,PRDM1,TP63
gene_set_query	719	SOX12	673.3	ARCHS4 Coexpression,689;Enrichr Queries,1038;GTEx Coexpression,293	ZNF83
gene_set_query	720	PRDM1	673.4	ARCHS4 Coexpression,1158;ENCODE ChIP-seq,19;Enrichr Queries,1234;ReMap ChIP-seq,22;GTEx Coexpression,934	SPEN,SMAD4,SETDB1,ZBTB10,ARID2
gene_set_query	721	PURA	674	ARCHS4 Coexpression,464;GTEx Coexpression,884	ASH1L
gene_set_query	722	MTERF2	675	ARCHS4 Coexpression,1187;GTEx Coexpression,163	SMAD4,ZNF83
gene_set_query	723	SPIB	675.8	ARCHS4 Coexpression,349;Enrichr Queries,968;ReMap ChIP-seq,272;GTEx Coexpression,1114	PRDM1,ZNF8
gene_set_query	724	LBX1	678.3	ARCHS4 Coexpression,1029;Enrichr Queries,529;GTEx Coexpression,477	MYOD1
gene_set_query	725	HINFP	678.3	ARCHS4 Coexpression,447;ReMap ChIP-seq,285;GTEx Coexpression,1303	ZNF8
gene_set_query	726	ZNF696	678.3	ARCHS4 Coexpression,635;Enrichr Queries,1010;GTEx Coexpression,390	ZZZ3,ZNF8
gene_set_query	727	ZNF446	678.7	ARCHS4 Coexpression,891;Enrichr Queries,1105;GTEx Coexpression,40	MECP2,SPEN,KMT2A,NRF1
gene_set_query	728	ZC3H8	679	ARCHS4 Coexpression,432;Enrichr Queries,1264;ReMap ChIP-seq,47;GTEx Coexpression,973	ZNF584,MYOD1,ZNF8
gene_set_query	729	ZBTB34	679	ARCHS4 Coexpression,1050;Enrichr Queries,77;GTEx Coexpression,910	SPEN,KMT2A,RFX7,ZBTB10,ARID2
gene_set_query	730	MZF1	679	ARCHS4 Coexpression,1343;Enrichr Queries,375;GTEx Coexpression,319	ZNF83,PRDM1,ESR1
gene_set_query	731	ZNF492	680.5	ARCHS4 Coexpression,293;GTEx Coexpression,1068	ZNF8
gene_set_query	732	ARNTL2	682	ARCHS4 Coexpression,550;Enrichr Queries,813;GTEx Coexpression,683	PRDM1,TP63
gene_set_query	733	ZNF615	683	ARCHS4 Coexpression,1260;Enrichr Queries,787;GTEx Coexpression,2	MECP2,SMAD4,KMT2A,SETBP1,ZNF83,XPA,ZBTB10,SMAD9,ASH1L
gene_set_query	734	GCM2	683.3	ARCHS4 Coexpression,715;Enrichr Queries,152;GTEx Coexpression,1183	MYOD1,PRDM1,ESR1
gene_set_query	735	DLX3	683.7	ARCHS4 Coexpression,698;Enrichr Queries,832;GTEx Coexpression,521	PRDM1,TP63
gene_set_query	736	NFKB2	684	ARCHS4 Coexpression,1049;Enrichr Queries,767;ReMap ChIP-seq,14;GTEx Coexpression,906	SMAD4,KMT2A,PRDM1,ARID2
gene_set_query	737	ZNF2	686.5	ARCHS4 Coexpression,468;Enrichr Queries,905	ZNF83,PRDM1
gene_set_query	738	ZNF521	686.7	ARCHS4 Coexpression,902;Enrichr Queries,302;GTEx Coexpression,856	SETBP1,PRDM1
gene_set_query	739	FOXB1	687	ARCHS4 Coexpression,1062;Enrichr Queries,535;GTEx Coexpression,464	PRDM1,CXXC4
gene_set_query	740	ZNF582	687	ARCHS4 Coexpression,636;Enrichr Queries,217;GTEx Coexpression,1208	SETBP1,ZNF83,PRDM1
gene_set_query	741	ZNF620	687.3	ARCHS4 Coexpression,436;Enrichr Queries,1062;GTEx Coexpression,564	KMT2A,ZNF8
gene_set_query	742	ZNF682	687.3	ARCHS4 Coexpression,222;Enrichr Queries,538;GTEx Coexpression,1302	ZNF83,TCF4
gene_set_query	743	ZIC2	687.3	ARCHS4 Coexpression,156;Enrichr Queries,1184;GTEx Coexpression,722	ARID2,BPTF
gene_set_query	744	SP9	687.5	ARCHS4 Coexpression,173;GTEx Coexpression,1202	TCF20,TCF4
gene_set_query	745	STAT6	690	Literature ChIP-seq,32;ARCHS4 Coexpression,726;Enrichr Queries,1177;GTEx Coexpression,825	SETBP1,PRDM1
gene_set_query	746	STAT5B	690.3	ARCHS4 Coexpression,1407;Enrichr Queries,234;ReMap ChIP-seq,88;GTEx Coexpression,1032	ZNF584,SMAD4,PRDM1,ESR1
gene_set_query	747	SOX15	690.3	ARCHS4 Coexpression,642;Enrichr Queries,749;GTEx Coexpression,680	PRDM1,TP63
gene_set_query	748	SOX6	692.5	ARCHS4 Coexpression,393;Enrichr Queries,835;ReMap ChIP-seq,17;GTEx Coexpression,1525	SPEN,SETBP1,RFX7,TCF4,PRDM1
gene_set_query	749	POU5F2	693	ARCHS4 Coexpression,115;GTEx Coexpression,1271	PRDM5,ZNF8
gene_set_query	750	ZNF99	693.3	ARCHS4 Coexpression,265;Enrichr Queries,998;GTEx Coexpression,817	ZNF8
gene_set_query	751	SATB1	693.5	ARCHS4 Coexpression,835;Enrichr Queries,487;ReMap ChIP-seq,289;GTEx Coexpression,1163	SETBP1,PRDM1
gene_set_query	752	KLF15	693.7	ARCHS4 Coexpression,727;Enrichr Queries,1290;GTEx Coexpression,64	SMAD4,ZBTB10,TCF20
gene_set_query	753	ELF5	693.8	Literature ChIP-seq,141;ARCHS4 Coexpression,1531;Enrichr Queries,356;ReMap ChIP-seq,291;GTEx Coexpression,1150	PRDM1,ESR1
gene_set_query	754	ZNF557	694.3	ARCHS4 Coexpression,322;Enrichr Queries,501;GTEx Coexpression,1260	SETBP1,ZBTB10,ZNF8
gene_set_query	755	MAFA	695.7	ARCHS4 Coexpression,849;Enrichr Queries,734;GTEx Coexpression,504	MYOD1,PRDM1
gene_set_query	756	HOXD3	695.7	ARCHS4 Coexpression,1291;Enrichr Queries,629;GTEx Coexpression,167	PRDM5,PRDM1,ESR1
gene_set_query	757	HOXD4	696	ARCHS4 Coexpression,1326;Enrichr Queries,596;GTEx Coexpression,166	PRDM5,PRDM1,ESR1
gene_set_query	758	ZFP82	697	ARCHS4 Coexpression,288;Enrichr Queries,652;GTEx Coexpression,1151	PRDM1,ZNF8
gene_set_query	759	ZNF214	697.3	ARCHS4 Coexpression,1482;Enrichr Queries,167;GTEx Coexpression,443	ZZZ3,PRDM1,CXXC4,ESR1
gene_set_query	760	E2F6	698.4	ARCHS4 Coexpression,1351;ENCODE ChIP-seq,39;Enrichr Queries,394;ReMap ChIP-seq,197;GTEx Coexpression,1511	ZNF584,SPEN,SMAD4,REST,SETDB1,ZBTB10,PRDM1,ESR1
gene_set_query	761	ZNF69	698.7	ARCHS4 Coexpression,269;Enrichr Queries,536;GTEx Coexpression,1291	ZNF83,PRDM5
gene_set_query	762	VENTX	699.3	ARCHS4 Coexpression,384;Enrichr Queries,623;GTEx Coexpression,1091	PRDM1,ZNF8
gene_set_query	763	ZBTB12	700.3	ARCHS4 Coexpression,705;Enrichr Queries,1098;GTEx Coexpression,298	ZZZ3
gene_set_query	764	NPAS3	701.7	ARCHS4 Coexpression,180;Enrichr Queries,415;GTEx Coexpression,1510	SETBP1,TCF4,ESR1,CXXC4
gene_set_query	765	DLX2	702.7	ARCHS4 Coexpression,333;Enrichr Queries,812;GTEx Coexpression,963	TCF4,PRDM1
gene_set_query	766	ZNF207	703	ARCHS4 Coexpression,457;Enrichr Queries,1003;ReMap ChIP-seq,117;GTEx Coexpression,1235	ZNF584,ARID2
gene_set_query	767	ZNF329	703.3	ARCHS4 Coexpression,287;Enrichr Queries,842;GTEx Coexpression,981	ZNF83,ZNF8
gene_set_query	768	ZNF549	703.3	ARCHS4 Coexpression,674;Enrichr Queries,546;GTEx Coexpression,890	ZNF83,ZNF8
gene_set_query	769	MBD1	703.7	ARCHS4 Coexpression,1272;Enrichr Queries,120;GTEx Coexpression,719	MECP2,SPEN,KMT2A,BPTF
gene_set_query	770	ZNF30	705	ARCHS4 Coexpression,122;Enrichr Queries,970;GTEx Coexpression,1023	ZNF83,TCF4,ARID2
gene_set_query	771	TBXT	705.3	ARCHS4 Coexpression,1008;Enrichr Queries,539;ReMap ChIP-seq,9;GTEx Coexpression,1265	SETBP1,MYOD1,TCF20,PRDM1
gene_set_query	772	ETV3	707.3	ARCHS4 Coexpression,944;Enrichr Queries,519;GTEx Coexpression,659	ZBTB10,PRDM1,TP63
gene_set_query	773	OVOL1	707.7	ARCHS4 Coexpression,525;Enrichr Queries,900;GTEx Coexpression,698	PRDM1,TP63
gene_set_query	774	CREB3	708	ARCHS4 Coexpression,867;Enrichr Queries,1211;ReMap ChIP-seq,103;GTEx Coexpression,651	SPEN,TP63
gene_set_query	775	HOXD9	708.7	ARCHS4 Coexpression,677;Enrichr Queries,1367;GTEx Coexpression,82	SETBP1,ZNF83,ESR1
gene_set_query	776	ZNF48	711.3	ARCHS4 Coexpression,969;Enrichr Queries,807;GTEx Coexpression,358	MECP2,PRDM1
gene_set_query	777	TBX19	711.7	ARCHS4 Coexpression,395;Enrichr Queries,405;GTEx Coexpression,1335	PRDM5,PRDM1,ESR1
gene_set_query	778	ZNF486	711.7	ARCHS4 Coexpression,145;Enrichr Queries,1391;GTEx Coexpression,599	PRDM5,SMAD9,ZNF8
gene_set_query	779	ZNF804A	712.3	ARCHS4 Coexpression,538;Enrichr Queries,477;GTEx Coexpression,1122	SETBP1,TCF4,PRDM1
gene_set_query	780	ZNF783	712.7	ARCHS4 Coexpression,1131;Enrichr Queries,732;GTEx Coexpression,275	SETDB1,SETBP1,ZNF83
gene_set_query	781	E2F7	712.8	Literature ChIP-seq,160;ARCHS4 Coexpression,1287;Enrichr Queries,1085;ReMap ChIP-seq,276;GTEx Coexpression,756
gene_set_query	782	ZNF491	714	ARCHS4 Coexpression,1066;Enrichr Queries,472;GTEx Coexpression,604	SMAD4,SETBP1,ZNF83
gene_set_query	783	ZNF786	714.3	ARCHS4 Coexpression,182;Enrichr Queries,1388;GTEx Coexpression,573	ZNF584,ZNF8,TP63
gene_set_query	784	ZNF157	715	ARCHS4 Coexpression,475;Enrichr Queries,902;GTEx Coexpression,768	ZNF8,CXXC4
gene_set_query	785	ZEB2	715.3	ARCHS4 Coexpression,545;Enrichr Queries,648;ReMap ChIP-seq,123;GTEx Coexpression,1545	TCF4,PRDM1
gene_set_query	786	KLF3	715.5	ARCHS4 Coexpression,1323;Enrichr Queries,914;ReMap ChIP-seq,8;GTEx Coexpression,617	SPEN,KMT2A,SMAD9,PRDM1,ARID2,TP63
gene_set_query	787	SKOR2	716	ARCHS4 Coexpression,456;GTEx Coexpression,976	CXXC4
gene_set_query	788	SOX17	716.3	Literature ChIP-seq,60;ARCHS4 Coexpression,1541;Enrichr Queries,826;GTEx Coexpression,438	SMAD4,TCF4,PRDM1,NRF1
gene_set_query	789	RXRB	717	ARCHS4 Coexpression,1375;Enrichr Queries,461;GTEx Coexpression,315	SMAD4,ZNF83,ESR1
gene_set_query	790	ZNF317	717.3	ARCHS4 Coexpression,524;Enrichr Queries,830;GTEx Coexpression,798	SPEN,PRDM1
gene_set_query	791	ZNF461	717.3	ARCHS4 Coexpression,744;Enrichr Queries,726;GTEx Coexpression,682	KMT2A,ZNF83
gene_set_query	792	GLI1	717.5	Literature ChIP-seq,159;ARCHS4 Coexpression,851;Enrichr Queries,662;GTEx Coexpression,1198	PRDM1
gene_set_query	793	JUND	717.7	Literature ChIP-seq,124;ARCHS4 Coexpression,1290;ENCODE ChIP-seq,24;Enrichr Queries,1249;ReMap ChIP-seq,234;GTEx Coexpression,1385	ZNF83,XPA,ASH1L,BPTF
gene_set_query	794	ZNF627	718	ARCHS4 Coexpression,1593;Enrichr Queries,368;GTEx Coexpression,193	SMAD4,ZZZ3,RFX7,ZBTB10
gene_set_query	795	HES7	718.7	ARCHS4 Coexpression,747;Enrichr Queries,738;GTEx Coexpression,671	KMT2A,PRDM1
gene_set_query	796	HAND1	718.7	ARCHS4 Coexpression,862;Enrichr Queries,584;GTEx Coexpression,710	PRDM1
gene_set_query	797	RORA	718.7	ARCHS4 Coexpression,1199;Enrichr Queries,379;GTEx Coexpression,578	SETBP1,PRDM1,TP63
gene_set_query	798	GATA4	720.2	Literature ChIP-seq,133;ARCHS4 Coexpression,1611;Enrichr Queries,327;ReMap ChIP-seq,240;GTEx Coexpression,1290	REST,PRDM1,ESR1
gene_set_query	799	NEUROD1	721	ARCHS4 Coexpression,646;Enrichr Queries,1215;ReMap ChIP-seq,212;GTEx Coexpression,811	CXXC4
gene_set_query	800	FOXN2	721.7	ARCHS4 Coexpression,286;Enrichr Queries,983;GTEx Coexpression,896	PRDM1,ARID2
gene_set_query	801	HMGN3	721.8	ARCHS4 Coexpression,1117;ENCODE ChIP-seq,74;ReMap ChIP-seq,264;GTEx Coexpression,1432	SETDB1,SMAD9,PRDM1
gene_set_query	802	MYT1L	722	ARCHS4 Coexpression,512;Enrichr Queries,484;GTEx Coexpression,1170	RFX7,TCF4,ASH1L
gene_set_query	803	ZSCAN22	722	ARCHS4 Coexpression,383;Enrichr Queries,384;GTEx Coexpression,1399	SPEN,ZNF8
gene_set_query	804	ZNF326	723.7	ARCHS4 Coexpression,128;Enrichr Queries,1005;GTEx Coexpression,1038	ARID2,BPTF
gene_set_query	805	ZNF177	724.3	ARCHS4 Coexpression,1448;Enrichr Queries,317;GTEx Coexpression,408	SETBP1,ZNF83
gene_set_query	806	RELB	724.8	ARCHS4 Coexpression,877;Enrichr Queries,823;ReMap ChIP-seq,27;GTEx Coexpression,1172	SMAD4,KMT2A,PRDM1,ARID2
gene_set_query	807	ZNF470	725	ARCHS4 Coexpression,329;Enrichr Queries,418;GTEx Coexpression,1428	ZNF83,ZNF507,ZNF8
gene_set_query	808	GLIS3	725	ARCHS4 Coexpression,1252;Enrichr Queries,708;GTEx Coexpression,215	PRDM5,SMAD9,PRDM1
gene_set_query	809	ELF3	725.8	ARCHS4 Coexpression,928;Enrichr Queries,1146;ReMap ChIP-seq,245;GTEx Coexpression,584	PRDM1
gene_set_query	810	KLF9	726.5	ARCHS4 Coexpression,1624;Enrichr Queries,1126;ReMap ChIP-seq,125;GTEx Coexpression,31	SPEN,SMAD4,SETBP1,ZBTB10,TCF20,ASH1L
gene_set_query	811	OVOL2	726.8	ARCHS4 Coexpression,793;Enrichr Queries,1201;ReMap ChIP-seq,295;GTEx Coexpression,618	TP63
gene_set_query	812	GATA6	727.2	Literature ChIP-seq,46;ARCHS4 Coexpression,986;Enrichr Queries,739;ReMap ChIP-seq,258;GTEx Coexpression,1607	SPEN,ZBTB10,PRDM1,ASH1L,ARID2,BPTF
gene_set_query	813	ZNF200	727.3	ARCHS4 Coexpression,391;Enrichr Queries,504;GTEx Coexpression,1287	ZBTB10,PRDM1,ZNF8
gene_set_query	814	ZBTB43	729	ARCHS4 Coexpression,1478;Enrichr Queries,417;GTEx Coexpression,292	MYOD1,ZBTB10,PRDM1
gene_set_query	815	GFI1B	729.8	Literature ChIP-seq,116;ARCHS4 Coexpression,1506;Enrichr Queries,948;ReMap ChIP-seq,235;GTEx Coexpression,844	RFX7,TCF4,PRDM1
gene_set_query	816	HIVEP2	731	ARCHS4 Coexpression,358;Enrichr Queries,711;GTEx Coexpression,1124	TCF20,PRDM1
gene_set_query	817	MSX1	732	ARCHS4 Coexpression,1139;Enrichr Queries,743;GTEx Coexpression,314	TCF4,PRDM1
gene_set_query	818	FOXD4L3	732.7	ARCHS4 Coexpression,801;Enrichr Queries,260;GTEx Coexpression,1137	MYOD1,PRDM1
gene_set_query	819	ZFPM2	733	ARCHS4 Coexpression,618;Enrichr Queries,1333;GTEx Coexpression,248	ZBTB10,TCF4
gene_set_query	820	EGR3	733	ARCHS4 Coexpression,758;Enrichr Queries,799;GTEx Coexpression,642	PRDM1,TP63
gene_set_query	821	GMEB2	733.7	ARCHS4 Coexpression,1321;Enrichr Queries,471;GTEx Coexpression,409	SPEN,SETDB1,PRDM1
gene_set_query	822	NKX61	734	ARCHS4 Coexpression,664;GTEx Coexpression,804	CXXC4
gene_set_query	823	HHEX	735	ARCHS4 Coexpression,1263;Enrichr Queries,819;ReMap ChIP-seq,133;GTEx Coexpression,725	ZBTB10,PRDM1
gene_set_query	824	ESRRA	736.2	ARCHS4 Coexpression,1300;ENCODE ChIP-seq,64;Enrichr Queries,972;ReMap ChIP-seq,244;GTEx Coexpression,1101	KMT2A,PRDM1,BPTF
gene_set_query	825	MYNN	736.3	ARCHS4 Coexpression,1538;Enrichr Queries,50;ReMap ChIP-seq,268;GTEx Coexpression,1089	SMAD4,ZZZ3,KMT2A,ZBTB10,ARID2,BPTF
gene_set_query	826	ZNF737	736.5	ARCHS4 Coexpression,298;GTEx Coexpression,1175	ZNF8
gene_set_query	827	HSFX1	737	ARCHS4 Coexpression,931;GTEx Coexpression,543	NRF1
gene_set_query	828	ALX3	737	ARCHS4 Coexpression,1157;Enrichr Queries,542;GTEx Coexpression,512	REST,PRDM1
gene_set_query	829	JRKL	737	ARCHS4 Coexpression,968;Enrichr Queries,946;GTEx Coexpression,297	REST,ZZZ3
gene_set_query	830	FOXD4L6	737	ARCHS4 Coexpression,1205;Enrichr Queries,269	PRDM1,ESR1
gene_set_query	831	ZNF823	737.7	ARCHS4 Coexpression,236;Enrichr Queries,936;GTEx Coexpression,1041	ZBTB10,ARID2
gene_set_query	832	ZFP62	738.3	ARCHS4 Coexpression,1545;Enrichr Queries,435;GTEx Coexpression,235	ZZZ3,ZNF83,BPTF
gene_set_query	833	THAP9	740.3	ARCHS4 Coexpression,1536;Enrichr Queries,344;GTEx Coexpression,341	ZZZ3,ZNF507,ZBTB10
gene_set_query	834	KLF6	740.5	ARCHS4 Coexpression,1037;Enrichr Queries,721;ReMap ChIP-seq,246;GTEx Coexpression,958	PRDM1
gene_set_query	835	MNT	741.3	ARCHS4 Coexpression,1036;Enrichr Queries,916;ReMap ChIP-seq,279;GTEx Coexpression,734	SPEN
gene_set_query	836	NOBOX	742.3	ARCHS4 Coexpression,972;Enrichr Queries,324;GTEx Coexpression,931	PRDM1,ESR1
gene_set_query	837	CREB5	742.7	ARCHS4 Coexpression,788;Enrichr Queries,633;GTEx Coexpression,807	PRDM1
gene_set_query	838	FOXI2	742.7	ARCHS4 Coexpression,1399;Enrichr Queries,156;GTEx Coexpression,673	MYOD1,PRDM1,ESR1
gene_set_query	839	FOXF2	743	ARCHS4 Coexpression,541;Enrichr Queries,678;GTEx Coexpression,1010	PRDM1,CXXC4
gene_set_query	840	ZNF260	743	ARCHS4 Coexpression,1472;Enrichr Queries,424;GTEx Coexpression,333	ZZZ3,RFX7,ARID2
gene_set_query	841	ST18	743.7	ARCHS4 Coexpression,632;Enrichr Queries,854;GTEx Coexpression,745	CXXC4
gene_set_query	842	OLIG3	744.7	ARCHS4 Coexpression,954;Enrichr Queries,154;GTEx Coexpression,1126	PRDM1,CXXC4,ESR1
gene_set_query	843	TFDP1	745.3	ARCHS4 Coexpression,767;Enrichr Queries,1052;ReMap ChIP-seq,50;GTEx Coexpression,1112	ZNF584,SPEN
gene_set_query	844	FOSL1	745.4	ARCHS4 Coexpression,1295;ENCODE ChIP-seq,111;Enrichr Queries,792;ReMap ChIP-seq,220;GTEx Coexpression,1309	PRDM1
gene_set_query	845	GSX1	745.7	ARCHS4 Coexpression,1277;Enrichr Queries,534;GTEx Coexpression,426	MYOD1,CXXC4
gene_set_query	846	ZNF385C	746.7	ARCHS4 Coexpression,313;Enrichr Queries,1075;GTEx Coexpression,852	ZNF8
gene_set_query	847	ETV6	746.8	ARCHS4 Coexpression,826;Enrichr Queries,935;ReMap ChIP-seq,262;GTEx Coexpression,964	PRDM1
gene_set_query	848	FOXB2	747	ARCHS4 Coexpression,476;Enrichr Queries,1402;GTEx Coexpression,363	CXXC4
gene_set_query	849	ASCL3	749	ARCHS4 Coexpression,692;Enrichr Queries,788;GTEx Coexpression,767	MYOD1
gene_set_query	850	FOXP3	749.8	Literature ChIP-seq,132;ARCHS4 Coexpression,1222;Enrichr Queries,515;GTEx Coexpression,1130	PRDM1,ESR1
gene_set_query	851	PAX2	750.3	ARCHS4 Coexpression,1085;Enrichr Queries,287;GTEx Coexpression,879	PRDM1,ESR1
gene_set_query	852	ZNF503	751	ARCHS4 Coexpression,570;Enrichr Queries,1239;GTEx Coexpression,444	SPEN,PRDM5
gene_set_query	853	HBP1	751.3	ARCHS4 Coexpression,853;Enrichr Queries,1299;ReMap ChIP-seq,168;GTEx Coexpression,685	ZNF584,ARID2
gene_set_query	854	PLAG1	752	ARCHS4 Coexpression,1418;Enrichr Queries,161;GTEx Coexpression,677	SETBP1,ZBTB10,PRDM1,BPTF
gene_set_query	855	ZNF133	752.3	ARCHS4 Coexpression,784;Enrichr Queries,1124;GTEx Coexpression,349	ZNF83
gene_set_query	856	ZNF8	753	ARCHS4 Coexpression,1431;Enrichr Queries,75	KMT2A,SETBP1,ZBTB10,ESR1,BPTF
gene_set_query	857	CEBPA	753.2	Literature ChIP-seq,126;ARCHS4 Coexpression,1335;Enrichr Queries,1158;ReMap ChIP-seq,152;GTEx Coexpression,995	SPEN,KMT2A,ASH1L
gene_set_query	858	ZNF3	753.7	ARCHS4 Coexpression,1110;Enrichr Queries,751;GTEx Coexpression,400	SMAD4,ZBTB10
gene_set_query	859	ZNF707	755.7	ARCHS4 Coexpression,848;Enrichr Queries,1066;GTEx Coexpression,353	SETDB1
gene_set_query	860	LHX3	756.3	ARCHS4 Coexpression,906;Enrichr Queries,153;GTEx Coexpression,1210	MYOD1,PRDM1,ESR1
gene_set_query	861	ETV4	757	ARCHS4 Coexpression,685;Enrichr Queries,774;ReMap ChIP-seq,166;GTEx Coexpression,1403	ZNF584,PRDM1
gene_set_query	862	TBX6	757	ARCHS4 Coexpression,599;Enrichr Queries,978;GTEx Coexpression,694	PRDM1,ZNF8
gene_set_query	863	LIN28B	758	ARCHS4 Coexpression,745;Enrichr Queries,353;GTEx Coexpression,1176	PRDM1,CXXC4
gene_set_query	864	MEIS2	758.8	ARCHS4 Coexpression,146;Enrichr Queries,1298;ReMap ChIP-seq,99;GTEx Coexpression,1492	SPEN,TCF4,CXXC4
gene_set_query	865	EMX2	759.3	ARCHS4 Coexpression,714;Enrichr Queries,1131;GTEx Coexpression,433	ESR1
gene_set_query	866	IRF6	762.7	ARCHS4 Coexpression,607;Enrichr Queries,1134;GTEx Coexpression,547	TP63
gene_set_query	867	DMRT3	764	ARCHS4 Coexpression,430;Enrichr Queries,533;GTEx Coexpression,1329	TCF4,PRDM1
gene_set_query	868	RAG1	764.3	ARCHS4 Coexpression,682;Enrichr Queries,479;GTEx Coexpression,1132	PRDM1,ESR1
gene_set_query	869	NR0B1	765.3	Literature ChIP-seq,110;ARCHS4 Coexpression,797;Enrichr Queries,583;GTEx Coexpression,1571	REST,SETDB1,ESR1
gene_set_query	870	RORC	766	ARCHS4 Coexpression,1176;Enrichr Queries,446;GTEx Coexpression,676	MYOD1,PRDM1,ESR1
gene_set_query	871	ZNF554	766	ARCHS4 Coexpression,319;Enrichr Queries,1032;GTEx Coexpression,947	ZNF8
gene_set_query	872	PPARG	767.6	Literature ChIP-seq,9;ARCHS4 Coexpression,1547;Enrichr Queries,433;ReMap ChIP-seq,257;GTEx Coexpression,1592	SMAD4,XPA,PRDM1,NRF1,ASH1L,ESR1
gene_set_query	873	ZSCAN1	768	ARCHS4 Coexpression,732;Enrichr Queries,1081;GTEx Coexpression,491	CXXC4
gene_set_query	874	CEBPE	768.3	ARCHS4 Coexpression,621;Enrichr Queries,963;GTEx Coexpression,721	SPEN,PRDM1
gene_set_query	875	ZNF174	768.7	ARCHS4 Coexpression,810;Enrichr Queries,817;GTEx Coexpression,679	NRF1,ESR1
gene_set_query	876	TFEB	769.8	Literature ChIP-seq,27;ARCHS4 Coexpression,1115;Enrichr Queries,874;GTEx Coexpression,1063	ZZZ3,ZNF507,PRDM1,BPTF
gene_set_query	877	ZNF502	770	ARCHS4 Coexpression,1033;Enrichr Queries,1235;GTEx Coexpression,42	SMAD4,ZZZ3,ZNF507,ASH1L
gene_set_query	878	GSC2	770	ARCHS4 Coexpression,856;Enrichr Queries,248;GTEx Coexpression,1206	MYOD1,ESR1
gene_set_query	879	CSRNP3	770.5	ARCHS4 Coexpression,637;GTEx Coexpression,904	CXXC4
gene_set_query	880	PIN1	771	ARCHS4 Coexpression,764;GTEx Coexpression,778
gene_set_query	881	ZNF184	772	ARCHS4 Coexpression,404;Enrichr Queries,475;GTEx Coexpression,1437	ZBTB10,TCF4,PRDM1
gene_set_query	882	TWIST1	773.3	ARCHS4 Coexpression,1578;Enrichr Queries,1106;ReMap ChIP-seq,102;GTEx Coexpression,307	ZZZ3,TCF20
gene_set_query	883	HNF1A	773.3	ARCHS4 Coexpression,1078;Enrichr Queries,387;GTEx Coexpression,855	PRDM1,ESR1
gene_set_query	884	ZNF547	774.7	ARCHS4 Coexpression,385;Enrichr Queries,938;GTEx Coexpression,1001	ZNF83,TCF20
gene_set_query	885	THAP5	774.7	ARCHS4 Coexpression,1318;Enrichr Queries,273;GTEx Coexpression,733	ZBTB10,BPTF
gene_set_query	886	E2F3	775.7	ARCHS4 Coexpression,760;Enrichr Queries,697;GTEx Coexpression,870	PRDM1
gene_set_query	887	ZNF724	776	ARCHS4 Coexpression,608;GTEx Coexpression,944	ZNF8
gene_set_query	888	MAZ	776.4	ARCHS4 Coexpression,974;ENCODE ChIP-seq,37;Enrichr Queries,1251;ReMap ChIP-seq,210;GTEx Coexpression,1410	SMAD4,SETDB1,NRF1,ZNF8,CXXC4
gene_set_query	889	CSRNP2	776.5	ARCHS4 Coexpression,691;GTEx Coexpression,862
gene_set_query	890	ZNF669	776.7	ARCHS4 Coexpression,284;Enrichr Queries,1297;GTEx Coexpression,749	ZNF8
gene_set_query	891	CENPS	777	ARCHS4 Coexpression,730;GTEx Coexpression,824
gene_set_query	892	POU4F1	777.3	ARCHS4 Coexpression,733;Enrichr Queries,303;GTEx Coexpression,1296	PRDM1,ESR1
gene_set_query	893	ZBTB4	778.3	ARCHS4 Coexpression,1539;Enrichr Queries,746;GTEx Coexpression,50	MECP2,KMT2A,SETBP1,ZNF83,SMAD9
gene_set_query	894	TEAD1	778.5	ARCHS4 Coexpression,1583;Enrichr Queries,1265;ReMap ChIP-seq,63;GTEx Coexpression,203	SMAD4,ZZZ3,XPA,PRDM1
gene_set_query	895	ARNTL	778.8	ARCHS4 Coexpression,1190;Enrichr Queries,1353;ReMap ChIP-seq,141;GTEx Coexpression,431	ZBTB10,NRF1
gene_set_query	896	STAT4	779.5	Literature ChIP-seq,131;ARCHS4 Coexpression,1102;Enrichr Queries,838;GTEx Coexpression,1047	KMT2A,PRDM1
gene_set_query	897	ZNF764	779.7	ARCHS4 Coexpression,497;Enrichr Queries,1275;GTEx Coexpression,567	SETDB1,ZNF8
gene_set_query	898	ZNF93	781.3	ARCHS4 Coexpression,296;Enrichr Queries,1034;GTEx Coexpression,1014	ARID2
gene_set_query	899	HSFY2	781.5	ARCHS4 Coexpression,703;GTEx Coexpression,860
gene_set_query	900	ZNF212	782	ARCHS4 Coexpression,1090;Enrichr Queries,1017;GTEx Coexpression,239	TCF20,PRDM1
gene_set_query	901	MBD4	782.2	ARCHS4 Coexpression,1297;ENCODE ChIP-seq,107;Enrichr Queries,1145;ReMap ChIP-seq,109;GTEx Coexpression,1253	ESR1
gene_set_query	902	ZNF165	782.3	ARCHS4 Coexpression,470;Enrichr Queries,1167;ReMap ChIP-seq,37;GTEx Coexpression,1455	KMT2A,ZBTB10
gene_set_query	903	OTX1	782.3	ARCHS4 Coexpression,1096;Enrichr Queries,555;GTEx Coexpression,696	ESR1,TP63
gene_set_query	904	ZFP92	782.3	ARCHS4 Coexpression,1247;Enrichr Queries,911;GTEx Coexpression,189	TCF4,PRDM1,TP63
gene_set_query	905	PAX4	782.7	ARCHS4 Coexpression,1233;Enrichr Queries,117;GTEx Coexpression,998	MYOD1,PRDM1,CXXC4,ESR1
gene_set_query	906	ZNF66	783	ARCHS4 Coexpression,641;GTEx Coexpression,925	ZNF8
gene_set_query	907	TFDP3	783.3	ARCHS4 Coexpression,919;Enrichr Queries,228;GTEx Coexpression,1203	PRDM1,ESR1,TP63
gene_set_query	908	ETV2	783.5	Literature ChIP-seq,51;ARCHS4 Coexpression,1056;Enrichr Queries,654;GTEx Coexpression,1373	ZNF584,SPEN,PRDM1,NRF1
gene_set_query	909	ZNF788P	784.3	ARCHS4 Coexpression,397;Enrichr Queries,1311;GTEx Coexpression,645	KMT2A,ZNF8
gene_set_query	910	DDIT3	784.3	ARCHS4 Coexpression,424;Enrichr Queries,1169;GTEx Coexpression,760	TCF20
gene_set_query	911	NOTO	785.7	ARCHS4 Coexpression,656;Enrichr Queries,247;GTEx Coexpression,1454	PRDM1,ZNF8,ESR1
gene_set_query	912	KLF13	785.8	ARCHS4 Coexpression,1220;Enrichr Queries,1040;ReMap ChIP-seq,271;GTEx Coexpression,612	SPEN
gene_set_query	913	NR4A2	788.5	Literature ChIP-seq,58;ARCHS4 Coexpression,898;Enrichr Queries,859;GTEx Coexpression,1339	PRDM1,CXXC4
gene_set_query	914	DZIP1	789.3	ARCHS4 Coexpression,500;Enrichr Queries,784;GTEx Coexpression,1084	SETBP1,BPTF
gene_set_query	915	ZSCAN26	789.5	ARCHS4 Coexpression,1442;GTEx Coexpression,137	MECP2,KMT2A,ZNF83
gene_set_query	916	BHLHA15	790	ARCHS4 Coexpression,707;GTEx Coexpression,873
gene_set_query	917	ZNF19	790.3	ARCHS4 Coexpression,308;Enrichr Queries,1268;GTEx Coexpression,795	ZNF8
gene_set_query	918	RFX2	792.3	ARCHS4 Coexpression,804;Enrichr Queries,827;ReMap ChIP-seq,107;GTEx Coexpression,1431	ZNF584,PRDM1
gene_set_query	919	SIX1	792.7	ARCHS4 Coexpression,893;Enrichr Queries,837;GTEx Coexpression,648	MYOD1,PRDM1
gene_set_query	920	ATOH8	793	ARCHS4 Coexpression,1550;Enrichr Queries,693;GTEx Coexpression,136	SPEN,SMAD4,SMAD9
gene_set_query	921	ZIC4	793.3	ARCHS4 Coexpression,775;Enrichr Queries,553;GTEx Coexpression,1052	ESR1
gene_set_query	922	CPEB1	793.5	ARCHS4 Coexpression,823;GTEx Coexpression,764
gene_set_query	923	HOXC6	793.7	ARCHS4 Coexpression,850;Enrichr Queries,1157;GTEx Coexpression,374	ZZZ3
gene_set_query	924	ZNF33B	793.7	ARCHS4 Coexpression,1186;Enrichr Queries,359;GTEx Coexpression,836	ZNF83,RFX7
gene_set_query	925	ZHX1	794.8	ARCHS4 Coexpression,748;Enrichr Queries,1031;ReMap ChIP-seq,84;GTEx Coexpression,1316	ZNF584,SPEN
gene_set_query	926	ZNF865	795.5	ARCHS4 Coexpression,1309;GTEx Coexpression,282	MYOD1,NRF1
gene_set_query	927	ZSCAN2	795.7	ARCHS4 Coexpression,295;Enrichr Queries,804;GTEx Coexpression,1288	PRDM1,ZNF8
gene_set_query	928	ISX	796	ARCHS4 Coexpression,1124;Enrichr Queries,522;GTEx Coexpression,742	PRDM1,ESR1
gene_set_query	929	NKX28	796.5	ARCHS4 Coexpression,626;GTEx Coexpression,967	ZNF8
gene_set_query	930	L3MBTL3	797	ARCHS4 Coexpression,70;GTEx Coexpression,1524	ARID2,BPTF
gene_set_query	931	PBX2	797.5	ARCHS4 Coexpression,892;Enrichr Queries,889;ReMap ChIP-seq,222;GTEx Coexpression,1187	PRDM1
gene_set_query	932	IRX3	798	ARCHS4 Coexpression,582;Enrichr Queries,1172;GTEx Coexpression,640	ESR1,TP63
gene_set_query	933	ZNF880	798	ARCHS4 Coexpression,1279;GTEx Coexpression,317	ZZZ3
gene_set_query	934	CENPBD1	798.5	ARCHS4 Coexpression,304;GTEx Coexpression,1293	TCF20
gene_set_query	935	NFYC	799.3	ARCHS4 Coexpression,811;Enrichr Queries,906;GTEx Coexpression,681	SMAD4,NRF1
gene_set_query	936	MESP2	800	ARCHS4 Coexpression,1219;Enrichr Queries,465;GTEx Coexpression,716	PRDM1,ESR1
gene_set_query	937	ZNF681	800	ARCHS4 Coexpression,675;Enrichr Queries,894;GTEx Coexpression,831	ZNF83,ZNF8
gene_set_query	938	SIX2	800.3	ARCHS4 Coexpression,1264;Enrichr Queries,1288;ReMap ChIP-seq,224;GTEx Coexpression,425	MYOD1
gene_set_query	939	ARID5A	800.5	ARCHS4 Coexpression,805;GTEx Coexpression,796
gene_set_query	940	SETDB2	801.7	ARCHS4 Coexpression,1331;Enrichr Queries,1006;GTEx Coexpression,68	REST,SETDB1,ARID2
gene_set_query	941	FOXD1	802	ARCHS4 Coexpression,1236;GTEx Coexpression,368	ZZZ3
gene_set_query	942	ZNF350	802.3	ARCHS4 Coexpression,1113;Enrichr Queries,298;GTEx Coexpression,996	ZNF83,PRDM1
gene_set_query	943	FOXI1	803.7	ARCHS4 Coexpression,1038;Enrichr Queries,320;GTEx Coexpression,1053	PRDM1,ESR1
gene_set_query	944	IRF2	804	ARCHS4 Coexpression,1097;Enrichr Queries,888;ReMap ChIP-seq,79;GTEx Coexpression,1152	SPEN,KMT2A,PRDM1
gene_set_query	945	ZNF526	804.3	ARCHS4 Coexpression,218;Enrichr Queries,1002;GTEx Coexpression,1193	ZNF8
gene_set_query	946	PREB	805.3	ARCHS4 Coexpression,737;Enrichr Queries,1013;GTEx Coexpression,666	MYOD1
gene_set_query	947	TGIF2	805.5	ARCHS4 Coexpression,955;Enrichr Queries,1372;ReMap ChIP-seq,227;GTEx Coexpression,668	SETDB1
gene_set_query	948	ZNF551	805.7	ARCHS4 Coexpression,413;Enrichr Queries,672;GTEx Coexpression,1332	KMT2A,ZNF8
gene_set_query	949	THAP11	805.8	Literature ChIP-seq,142;ARCHS4 Coexpression,1592;Enrichr Queries,1008;ReMap ChIP-seq,95;GTEx Coexpression,1192	ZNF8
gene_set_query	950	MYCL	807.5	ARCHS4 Coexpression,1009;GTEx Coexpression,606	TP63
gene_set_query	951	ETV3L	807.7	ARCHS4 Coexpression,864;Enrichr Queries,756;GTEx Coexpression,803	PRDM1
gene_set_query	952	ZNF677	808	ARCHS4 Coexpression,478;Enrichr Queries,503;GTEx Coexpression,1443	SETBP1,ZNF83,ZNF8
gene_set_query	953	ZNF728	808.5	ARCHS4 Coexpression,372;GTEx Coexpression,1245	REST
gene_set_query	954	GLMP	809	ARCHS4 Coexpression,842;GTEx Coexpression,776
gene_set_query	955	DMBX1	809	ARCHS4 Coexpression,429;Enrichr Queries,564;GTEx Coexpression,1434	PRDM1,ZNF8
gene_set_query	956	ETV1	809.5	ARCHS4 Coexpression,1510;Enrichr Queries,815;ReMap ChIP-seq,185;GTEx Coexpression,728	PRDM1,ARID2
gene_set_query	957	POU4F2	810	ARCHS4 Coexpression,723;Enrichr Queries,1384;ReMap ChIP-seq,28;GTEx Coexpression,1105	ZNF584,KMT2A,CXXC4
gene_set_query	958	ZNF132	810.7	ARCHS4 Coexpression,366;Enrichr Queries,923;GTEx Coexpression,1143	ZNF584,CXXC4
gene_set_query	959	TEAD2	810.8	ARCHS4 Coexpression,880;Enrichr Queries,1296;ReMap ChIP-seq,112;GTEx Coexpression,955	ZNF584
gene_set_query	960	LEF1	812.8	ARCHS4 Coexpression,1387;Enrichr Queries,593;ReMap ChIP-seq,15;GTEx Coexpression,1256	ZNF584,REST,KMT2A,PRDM1
gene_set_query	961	ZGPAT	813.7	ARCHS4 Coexpression,718;Enrichr Queries,1012;GTEx Coexpression,711
gene_set_query	962	SALL4	814.8	Literature ChIP-seq,77;ARCHS4 Coexpression,704;Enrichr Queries,1209;GTEx Coexpression,1269	ZZZ3,NRF1
gene_set_query	963	LBX2	815	ARCHS4 Coexpression,960;Enrichr Queries,434;GTEx Coexpression,1051	PRDM1,ESR1
gene_set_query	964	ZNF253	815.3	ARCHS4 Coexpression,1532;Enrichr Queries,212;GTEx Coexpression,702	ZNF507,ZNF83,RFX7,BPTF
gene_set_query	965	IRX2	815.7	ARCHS4 Coexpression,590;Enrichr Queries,1319;GTEx Coexpression,538	CXXC4,TP63
gene_set_query	966	NFYB	816.4	ARCHS4 Coexpression,1348;ENCODE ChIP-seq,96;Enrichr Queries,878;ReMap ChIP-seq,179;GTEx Coexpression,1581	ZNF584,SMAD4,XPA,ZNF8
gene_set_query	967	TIGD4	818.3	ARCHS4 Coexpression,220;Enrichr Queries,632;GTEx Coexpression,1603	PRDM1,CXXC4
gene_set_query	968	TGIF2LY	818.7	ARCHS4 Coexpression,446;Enrichr Queries,525;GTEx Coexpression,1485	ESR1
gene_set_query	969	PHOX2A	819.3	ARCHS4 Coexpression,728;Enrichr Queries,267;GTEx Coexpression,1463	MYOD1,PRDM1
gene_set_query	970	TIGD6	820	ARCHS4 Coexpression,1628;Enrichr Queries,490;GTEx Coexpression,342	ZZZ3,SETBP1,PRDM1
gene_set_query	971	TIGD1	820	ARCHS4 Coexpression,314;GTEx Coexpression,1326	PRDM5
gene_set_query	972	RAX	820	ARCHS4 Coexpression,1586;Enrichr Queries,144;GTEx Coexpression,730	MYOD1,PRDM1,ESR1
gene_set_query	973	ZNF233	820.3	ARCHS4 Coexpression,138;Enrichr Queries,850;GTEx Coexpression,1473	SETBP1,PRDM5,ZNF8
gene_set_query	974	HEYL	821.3	ARCHS4 Coexpression,909;Enrichr Queries,1185;GTEx Coexpression,370	ZBTB10
gene_set_query	975	SATB2	821.3	ARCHS4 Coexpression,116;Enrichr Queries,1323;GTEx Coexpression,1025	TCF4,BPTF
gene_set_query	976	ELK3	822	Literature ChIP-seq,47;ARCHS4 Coexpression,912;Enrichr Queries,750;GTEx Coexpression,1579	ZNF584,REST,ZZZ3,RFX7,MYOD1,PRDM1
gene_set_query	977	MTF1	822	ARCHS4 Coexpression,900;GTEx Coexpression,744
gene_set_query	978	ZNF706	822.7	ARCHS4 Coexpression,408;Enrichr Queries,1030;GTEx Coexpression,1030	TCF20
gene_set_query	979	NKX32	823	ARCHS4 Coexpression,832;GTEx Coexpression,814
gene_set_query	980	RHOXF1	823.3	ARCHS4 Coexpression,640;Enrichr Queries,937;GTEx Coexpression,893	ESR1,TP63
gene_set_query	981	ZBTB7C	824.3	ARCHS4 Coexpression,616;Enrichr Queries,1269;GTEx Coexpression,588	TP63
gene_set_query	982	NFATC3	825.3	ARCHS4 Coexpression,1196;Enrichr Queries,73;GTEx Coexpression,1207	SPEN,SMAD4,KMT2A,ASH1L,BPTF
gene_set_query	983	ZNF324	825.3	ARCHS4 Coexpression,1329;Enrichr Queries,516;GTEx Coexpression,631	ZNF584,TCF20,ZNF8
gene_set_query	984	ZNF729	826	ARCHS4 Coexpression,411;GTEx Coexpression,1241	REST
gene_set_query	985	ZNF80	826.7	ARCHS4 Coexpression,1087;Enrichr Queries,636;GTEx Coexpression,757	PRDM1
gene_set_query	986	CXXC4	827	ARCHS4 Coexpression,1098;ReMap ChIP-seq,53;GTEx Coexpression,1330	SPEN,ZBTB10
gene_set_query	987	ZNF705E	828	ARCHS4 Coexpression,1071;GTEx Coexpression,585	SPEN
gene_set_query	988	ATOH1	829	ARCHS4 Coexpression,840;Enrichr Queries,282;GTEx Coexpression,1365	PRDM1,ESR1
gene_set_query	989	BATF3	829.7	ARCHS4 Coexpression,763;Enrichr Queries,846;GTEx Coexpression,880	PRDM1
gene_set_query	990	MBD2	830.3	ARCHS4 Coexpression,1363;Enrichr Queries,456;ReMap ChIP-seq,108;GTEx Coexpression,1394	SMAD4,MYOD1,BPTF
gene_set_query	991	ZNF575	831	ARCHS4 Coexpression,1520;Enrichr Queries,643;GTEx Coexpression,330	PRDM1,ARID2
gene_set_query	992	ZSCAN5A	831	ARCHS4 Coexpression,374;Enrichr Queries,715;GTEx Coexpression,1404	PRDM1,ZNF8
gene_set_query	993	HAND2	831.3	ARCHS4 Coexpression,510;Enrichr Queries,626;GTEx Coexpression,1358	SMAD9,PRDM1
gene_set_query	994	NFIL3	831.7	ARCHS4 Coexpression,859;Enrichr Queries,845;GTEx Coexpression,791	PRDM1
gene_set_query	995	ZNF16	832	ARCHS4 Coexpression,1143;Enrichr Queries,1230;GTEx Coexpression,123	ZNF584,RFX7,TP63
gene_set_query	996	IRF3	832	ARCHS4 Coexpression,1362;ENCODE ChIP-seq,52;Enrichr Queries,1181;ReMap ChIP-seq,19;GTEx Coexpression,1546	ZNF584,ZNF8,ARID2
gene_set_query	997	ZNF302	832	ARCHS4 Coexpression,997;Enrichr Queries,680;GTEx Coexpression,819	ZNF83
gene_set_query	998	HIF1A	832.4	Literature ChIP-seq,85;ARCHS4 Coexpression,1278;Enrichr Queries,1136;ReMap ChIP-seq,146;GTEx Coexpression,1517	PRDM1,ARID2
gene_set_query	999	SNAPC4	833	ARCHS4 Coexpression,1175;Enrichr Queries,1242;ReMap ChIP-seq,58;GTEx Coexpression,857	ZBTB10,ESR1
gene_set_query	1000	NR2F6	833.3	ARCHS4 Coexpression,981;Enrichr Queries,1092;ReMap ChIP-seq,255;GTEx Coexpression,1005
gene_set_query	1001	NR1D2	833.7	ARCHS4 Coexpression,1144;Enrichr Queries,1222;GTEx Coexpression,135	KMT2A,TCF4,ASH1L
gene_set_query	1002	ZNF239	833.7	ARCHS4 Coexpression,959;Enrichr Queries,1175;GTEx Coexpression,367	ZNF507
gene_set_query	1003	HMG20A	834.7	ARCHS4 Coexpression,660;Enrichr Queries,1118;GTEx Coexpression,726	RFX7
gene_set_query	1004	ZNF829	834.7	ARCHS4 Coexpression,299;Enrichr Queries,757;GTEx Coexpression,1448	ZNF83,ZNF8
gene_set_query	1005	ZSCAN4	834.7	ARCHS4 Coexpression,1359;Enrichr Queries,599;GTEx Coexpression,546	PRDM1,TP63
gene_set_query	1006	ZNF169	834.7	ARCHS4 Coexpression,673;Enrichr Queries,1203;GTEx Coexpression,628	NRF1,ZNF8
gene_set_query	1007	HMX2	835.7	ARCHS4 Coexpression,1133;Enrichr Queries,257;GTEx Coexpression,1117	PRDM1,ESR1
gene_set_query	1008	ZBTB9	836.3	ARCHS4 Coexpression,1402;Enrichr Queries,741;GTEx Coexpression,366	SETBP1,PRDM1
gene_set_query	1009	ZNF814	837.5	ARCHS4 Coexpression,196;GTEx Coexpression,1479	ZNF8
gene_set_query	1010	TSHZ2	837.7	ARCHS4 Coexpression,1413;Enrichr Queries,717;GTEx Coexpression,383	SETBP1,TCF4
gene_set_query	1011	ZNF830	837.7	ARCHS4 Coexpression,1328;Enrichr Queries,1029;GTEx Coexpression,156	REST,SETDB1
gene_set_query	1012	ZNF202	838.7	ARCHS4 Coexpression,751;Enrichr Queries,1351;GTEx Coexpression,414	SETDB1
gene_set_query	1013	ZNF316	839.3	ARCHS4 Coexpression,1181;Enrichr Queries,898;GTEx Coexpression,439	SPEN,SETDB1
gene_set_query	1014	DNMT1	839.5	ARCHS4 Coexpression,568;GTEx Coexpression,1111	TCF20
gene_set_query	1015	POU2F3	839.7	ARCHS4 Coexpression,1571;Enrichr Queries,407;GTEx Coexpression,541	PRDM1,ESR1,TP63
gene_set_query	1016	YY2	840	ARCHS4 Coexpression,1616;Enrichr Queries,397;GTEx Coexpression,507	REST,ZZZ3,PRDM1
gene_set_query	1017	ZNF454	840	ARCHS4 Coexpression,1092;Enrichr Queries,992;GTEx Coexpression,436	KMT2A
gene_set_query	1018	ZBTB32	840.7	ARCHS4 Coexpression,754;Enrichr Queries,945;GTEx Coexpression,823	PRDM1
gene_set_query	1019	POU6F2	841	ARCHS4 Coexpression,896;Enrichr Queries,136;GTEx Coexpression,1491	SETBP1,PRDM1,CXXC4,ESR1
gene_set_query	1020	EGR2	842.3	ARCHS4 Coexpression,985;Enrichr Queries,834;GTEx Coexpression,708	PRDM1
gene_set_query	1021	ZNF674	842.7	ARCHS4 Coexpression,223;Enrichr Queries,1376;GTEx Coexpression,929	ZNF8
gene_set_query	1022	ZNF716	843	ARCHS4 Coexpression,213;Enrichr Queries,964;GTEx Coexpression,1352	PRDM1,ZNF8
gene_set_query	1023	OTX2	843.5	ARCHS4 Coexpression,1405;Enrichr Queries,550;ReMap ChIP-seq,273;GTEx Coexpression,1146	PRDM1
gene_set_query	1024	RBPJL	844.3	ARCHS4 Coexpression,1424;Enrichr Queries,289;GTEx Coexpression,820	PRDM1,ESR1
gene_set_query	1025	MAFF	845	ARCHS4 Coexpression,1619;ENCODE ChIP-seq,91;Enrichr Queries,820;ReMap ChIP-seq,196;GTEx Coexpression,1499	SPEN,ZZZ3,SETDB1,PRDM1
gene_set_query	1026	TBX5	845.5	Literature ChIP-seq,101;ARCHS4 Coexpression,1515;Enrichr Queries,413;GTEx Coexpression,1353	ZZZ3,PRDM5,TCF4,PRDM1,ESR1
gene_set_query	1027	ZNF600	846	ARCHS4 Coexpression,995;Enrichr Queries,259;GTEx Coexpression,1284	ZNF83,PRDM1
gene_set_query	1028	DMRTC2	846	ARCHS4 Coexpression,821;Enrichr Queries,637;GTEx Coexpression,1080	PRDM1
gene_set_query	1029	ZNF117	847.7	ARCHS4 Coexpression,528;Enrichr Queries,554;GTEx Coexpression,1461	ZNF83
gene_set_query	1030	MYF6	848.3	ARCHS4 Coexpression,924;Enrichr Queries,346;GTEx Coexpression,1275	MYOD1,ESR1
gene_set_query	1031	ATF6	848.3	ARCHS4 Coexpression,781;Enrichr Queries,967;GTEx Coexpression,797	SPEN
gene_set_query	1032	FLYWCH1	848.5	ARCHS4 Coexpression,1595;GTEx Coexpression,102	MECP2,KMT2A,ZNF83
gene_set_query	1033	NFATC4	848.7	ARCHS4 Coexpression,1285;Enrichr Queries,1151;GTEx Coexpression,110	SETBP1,ZNF83,PRDM5
gene_set_query	1034	ZFP90	849.3	ARCHS4 Coexpression,321;Enrichr Queries,887;GTEx Coexpression,1340	PRDM1,CXXC4
gene_set_query	1035	FOXG1	851	ARCHS4 Coexpression,307;Enrichr Queries,1204;GTEx Coexpression,1042	TCF4
gene_set_query	1036	CENPA	853	ARCHS4 Coexpression,897;GTEx Coexpression,809
gene_set_query	1037	VSX2	853.3	ARCHS4 Coexpression,819;Enrichr Queries,252;GTEx Coexpression,1489	MYOD1,PRDM1
gene_set_query	1038	CDX4	854.3	ARCHS4 Coexpression,708;Enrichr Queries,1192;GTEx Coexpression,663	TP63
gene_set_query	1039	DR1	854.7	ARCHS4 Coexpression,1602;Enrichr Queries,934;GTEx Coexpression,28	REST,ZZZ3,RFX7,TCF20,ARID2,TP63
gene_set_query	1040	ZNF641	855	ARCHS4 Coexpression,766;Enrichr Queries,590;GTEx Coexpression,1209	PRDM1
gene_set_query	1041	UNCX	855	ARCHS4 Coexpression,1248;Enrichr Queries,559;GTEx Coexpression,758	PRDM1
gene_set_query	1042	ATOH7	856	ARCHS4 Coexpression,817;Enrichr Queries,612;GTEx Coexpression,1139	PRDM1
gene_set_query	1043	HOXB9	856	ARCHS4 Coexpression,595;Enrichr Queries,1212;GTEx Coexpression,761	SPEN
gene_set_query	1044	PRDM5	856	Literature ChIP-seq,93;ARCHS4 Coexpression,1561;Enrichr Queries,1371;GTEx Coexpression,399	MECP2,SMAD4,XPA
gene_set_query	1045	ZHX3	857	ARCHS4 Coexpression,1223;Enrichr Queries,893;GTEx Coexpression,455	SETBP1,ASH1L
gene_set_query	1046	ZFP3	857.3	ARCHS4 Coexpression,509;Enrichr Queries,805;GTEx Coexpression,1258	TCF4,PRDM1
gene_set_query	1047	PHOX2B	858.7	ARCHS4 Coexpression,558;Enrichr Queries,611;GTEx Coexpression,1407	SMAD9,PRDM1
gene_set_query	1048	LMX1A	860.7	ARCHS4 Coexpression,623;Enrichr Queries,673;GTEx Coexpression,1286	ESR1,CXXC4
gene_set_query	1049	GLI4	861	ARCHS4 Coexpression,1410;GTEx Coexpression,312	ASH1L
gene_set_query	1050	MSX2	861.7	ARCHS4 Coexpression,970;Enrichr Queries,429;GTEx Coexpression,1186	PRDM1,ESR1
gene_set_query	1051	PRDM13	861.7	ARCHS4 Coexpression,861;Enrichr Queries,624;GTEx Coexpression,1100	PRDM1
gene_set_query	1052	ZFP91	862	ARCHS4 Coexpression,532;Enrichr Queries,514;GTEx Coexpression,1540	KMT2A,TCF20,ASH1L
gene_set_query	1053	ZNF131	862.3	ARCHS4 Coexpression,1518;Enrichr Queries,944;GTEx Coexpression,125	ZZZ3,SETDB1,RFX7,ARID2
gene_set_query	1054	TBX21	862.5	ARCHS4 Coexpression,1371;Enrichr Queries,984;ReMap ChIP-seq,75;GTEx Coexpression,1020	SPEN,PRDM1
gene_set_query	1055	HOXA7	862.7	ARCHS4 Coexpression,1243;Enrichr Queries,675;GTEx Coexpression,670	RFX7,PRDM1
gene_set_query	1056	EPAS1	863.3	ARCHS4 Coexpression,1365;Enrichr Queries,1245;ReMap ChIP-seq,261;GTEx Coexpression,582	TCF4
gene_set_query	1057	PRDM12	863.7	ARCHS4 Coexpression,619;Enrichr Queries,1219;GTEx Coexpression,753	MYOD1
gene_set_query	1058	SOX9	864.6	Literature ChIP-seq,120;ARCHS4 Coexpression,1439;Enrichr Queries,1121;ReMap ChIP-seq,134;GTEx Coexpression,1509	ZNF584,SMAD4,TCF20
gene_set_query	1059	KLF11	865.3	ARCHS4 Coexpression,807;Enrichr Queries,1220;GTEx Coexpression,569	ARID2
gene_set_query	1060	SOX30	865.7	ARCHS4 Coexpression,617;Enrichr Queries,560;GTEx Coexpression,1420	XPA,PRDM1
gene_set_query	1061	TBX4	866.3	ARCHS4 Coexpression,982;Enrichr Queries,292;GTEx Coexpression,1325	PRDM1,ESR1
gene_set_query	1062	ZFP57	866.7	ARCHS4 Coexpression,650;Enrichr Queries,646;GTEx Coexpression,1304	REST,PRDM1
gene_set_query	1063	ZNF296	867.3	ARCHS4 Coexpression,814;Enrichr Queries,620;GTEx Coexpression,1168	PRDM1
gene_set_query	1064	EBF3	868	ARCHS4 Coexpression,858;Enrichr Queries,1285;GTEx Coexpression,461	TCF4
gene_set_query	1065	FOXH1	868.7	ARCHS4 Coexpression,866;Enrichr Queries,478;GTEx Coexpression,1262	PRDM1,ESR1
gene_set_query	1066	FOXD4L5	870	ARCHS4 Coexpression,485;Enrichr Queries,545;GTEx Coexpression,1580	PRDM5,PRDM1
gene_set_query	1067	SKI	870.5	ARCHS4 Coexpression,1530;GTEx Coexpression,211	MECP2,KMT2A
gene_set_query	1068	CREB3L2	871	ARCHS4 Coexpression,1179;Enrichr Queries,1291;GTEx Coexpression,143	PRDM5,SMAD9
gene_set_query	1069	NFXL1	871.3	ARCHS4 Coexpression,1341;Enrichr Queries,1071;GTEx Coexpression,202	REST,SETDB1
gene_set_query	1070	PITX2	871.7	ARCHS4 Coexpression,1101;Enrichr Queries,824;GTEx Coexpression,690	MYOD1,PRDM1
gene_set_query	1071	GBX2	874.5	Literature ChIP-seq,151;ARCHS4 Coexpression,1164;Enrichr Queries,589;GTEx Coexpression,1594	PRDM1
gene_set_query	1072	VAX1	874.7	ARCHS4 Coexpression,940;Enrichr Queries,263;GTEx Coexpression,1421	PRDM1,ESR1
gene_set_query	1073	ZNF74	874.7	ARCHS4 Coexpression,493;Enrichr Queries,797;GTEx Coexpression,1334	ZNF8,ESR1
gene_set_query	1074	TFCP2L1	875	ARCHS4 Coexpression,578;Enrichr Queries,1284;GTEx Coexpression,763	TP63
gene_set_query	1075	ZNF580	875	ARCHS4 Coexpression,1258;Enrichr Queries,1293;GTEx Coexpression,74	MECP2,ZNF83,SMAD9
gene_set_query	1076	NEUROD2	875.3	Literature ChIP-seq,94;ARCHS4 Coexpression,1163;Enrichr Queries,1307;GTEx Coexpression,937	SMAD4,ZBTB10,TCF4
gene_set_query	1077	ZBTB3	875.7	ARCHS4 Coexpression,575;Enrichr Queries,1271;GTEx Coexpression,781	ZNF8
gene_set_query	1078	ZNF799	876	ARCHS4 Coexpression,211;Enrichr Queries,1226;GTEx Coexpression,1191	PRDM5
gene_set_query	1079	ZBTB7B	876.3	ARCHS4 Coexpression,1064;Enrichr Queries,952;GTEx Coexpression,613	PRDM1,TP63
gene_set_query	1080	ZNF777	877.3	ARCHS4 Coexpression,1447;Enrichr Queries,953;GTEx Coexpression,232	ZNF584,NRF1,PRDM1
gene_set_query	1081	ZFHX2	877.3	ARCHS4 Coexpression,534;Enrichr Queries,877;GTEx Coexpression,1221	SPEN,BPTF
gene_set_query	1082	ZNF625	878	ARCHS4 Coexpression,1231;Enrichr Queries,181;GTEx Coexpression,1222	KMT2A,ZNF83,ZNF8
gene_set_query	1083	ZNF443	879.3	ARCHS4 Coexpression,217;Enrichr Queries,1263;GTEx Coexpression,1158	ARID2
gene_set_query	1084	MECOM	879.7	Literature ChIP-seq,95;ARCHS4 Coexpression,992;GTEx Coexpression,1552	SETDB1,PRDM1,BPTF
gene_set_query	1085	PKNOX2	880	ARCHS4 Coexpression,620;Enrichr Queries,601;GTEx Coexpression,1419	SETBP1,ZNF8
gene_set_query	1086	ZNF257	880.3	ARCHS4 Coexpression,355;Enrichr Queries,1063;GTEx Coexpression,1223	ZNF8
gene_set_query	1087	ISL2	881	ARCHS4 Coexpression,1262;Enrichr Queries,268;GTEx Coexpression,1113	PRDM1,ESR1
gene_set_query	1088	ZFAT	881	ARCHS4 Coexpression,876;Enrichr Queries,499;GTEx Coexpression,1268	SETBP1,PRDM1
gene_set_query	1089	FEZF1	882	ARCHS4 Coexpression,882;Enrichr Queries,1332;GTEx Coexpression,432	CXXC4
gene_set_query	1090	JDP2	882	ARCHS4 Coexpression,1052;Enrichr Queries,752;GTEx Coexpression,842	PRDM1
gene_set_query	1091	ZNF83	882.5	ARCHS4 Coexpression,1456;Enrichr Queries,1310;ReMap ChIP-seq,283;GTEx Coexpression,481	KMT2A
gene_set_query	1092	ZNF484	882.7	ARCHS4 Coexpression,1612;Enrichr Queries,33;GTEx Coexpression,1003	ZNF507,RFX7,ZBTB10,PRDM1,ASH1L,ARID2
gene_set_query	1093	HLX	883.7	ARCHS4 Coexpression,1058;Enrichr Queries,758;GTEx Coexpression,835	PRDM1
gene_set_query	1094	HOXC12	884	ARCHS4 Coexpression,1434;Enrichr Queries,531;GTEx Coexpression,687	MYOD1,TP63
gene_set_query	1095	DPF3	884	ARCHS4 Coexpression,886;Enrichr Queries,366;GTEx Coexpression,1400	SETBP1,ESR1
gene_set_query	1096	NR4A3	884.3	ARCHS4 Coexpression,822;Enrichr Queries,760;GTEx Coexpression,1071	PRDM1
gene_set_query	1097	JUNB	884.8	ARCHS4 Coexpression,1268;Enrichr Queries,1130;ReMap ChIP-seq,60;GTEx Coexpression,1081	ZNF584,SPEN
gene_set_query	1098	TRAFD1	885	ARCHS4 Coexpression,684;Enrichr Queries,1068;GTEx Coexpression,903
gene_set_query	1099	NR1H4	885.3	ARCHS4 Coexpression,1002;Enrichr Queries,702;GTEx Coexpression,952	ESR1
gene_set_query	1100	ZNF835	885.3	ARCHS4 Coexpression,279;Enrichr Queries,1097;GTEx Coexpression,1280	ZNF8
gene_set_query	1101	CEBPG	885.8	ARCHS4 Coexpression,1154;Enrichr Queries,1327;ReMap ChIP-seq,96;GTEx Coexpression,966	ESR1
gene_set_query	1102	PLAGL1	886	ARCHS4 Coexpression,167;Enrichr Queries,1262;GTEx Coexpression,1229	ARID2,CXXC4
gene_set_query	1103	HOXB2	886.3	ARCHS4 Coexpression,976;Enrichr Queries,694;GTEx Coexpression,989	PRDM1
gene_set_query	1104	SNAI3	887	ARCHS4 Coexpression,693;Enrichr Queries,1138;GTEx Coexpression,830
gene_set_query	1105	SOX3	887.3	ARCHS4 Coexpression,1053;Enrichr Queries,1281;GTEx Coexpression,328	CXXC4
gene_set_query	1106	ZNF79	888	ARCHS4 Coexpression,474;Enrichr Queries,866;GTEx Coexpression,1324	PRDM1
gene_set_query	1107	MSGN1	888.3	ARCHS4 Coexpression,1562;Enrichr Queries,443;GTEx Coexpression,660	PRDM1,ESR1
gene_set_query	1108	HIC2	888.7	ARCHS4 Coexpression,1091;Enrichr Queries,437;GTEx Coexpression,1138	ZBTB10,PRDM1
gene_set_query	1109	REL	889.3	ARCHS4 Coexpression,1406;Enrichr Queries,507;GTEx Coexpression,755	ZBTB10,PRDM1
gene_set_query	1110	HOXB6	890	ARCHS4 Coexpression,911;Enrichr Queries,649;GTEx Coexpression,1110	PRDM1
gene_set_query	1111	MEOX1	890	ARCHS4 Coexpression,1626;Enrichr Queries,585;GTEx Coexpression,459	TCF4,PRDM1
gene_set_query	1112	SOX4	890	ARCHS4 Coexpression,44;Enrichr Queries,1112;GTEx Coexpression,1514	TCF4,ARID2,CXXC4
gene_set_query	1113	CDX1	890.3	ARCHS4 Coexpression,1004;Enrichr Queries,755;GTEx Coexpression,912	PRDM1
gene_set_query	1114	ZNF213	890.3	ARCHS4 Coexpression,711;Enrichr Queries,1036;GTEx Coexpression,924
gene_set_query	1115	PEG3	890.5	ARCHS4 Coexpression,1282;GTEx Coexpression,499	CXXC4
gene_set_query	1116	SPIC	890.7	ARCHS4 Coexpression,667;Enrichr Queries,912;GTEx Coexpression,1093	REST,PRDM1
gene_set_query	1117	PROP1	890.7	ARCHS4 Coexpression,1182;Enrichr Queries,258;GTEx Coexpression,1232	PRDM1,ESR1
gene_set_query	1118	ZNF843	891.7	ARCHS4 Coexpression,309;Enrichr Queries,1148;GTEx Coexpression,1218	ZNF8
gene_set_query	1119	NME2	891.7	ARCHS4 Coexpression,1075;ReMap ChIP-seq,128;GTEx Coexpression,1472	ZNF507
gene_set_query	1120	TIGD7	891.7	ARCHS4 Coexpression,1490;Enrichr Queries,565;GTEx Coexpression,620	ZNF507,ZNF83
gene_set_query	1121	ZNF284	892	ARCHS4 Coexpression,1495;Enrichr Queries,191;GTEx Coexpression,990	SETBP1,ZNF83,PRDM1
gene_set_query	1122	TCF21	893	Literature ChIP-seq,137;ARCHS4 Coexpression,1203;Enrichr Queries,1213;GTEx Coexpression,1019	ZBTB10
gene_set_query	1123	SIX4	894.3	ARCHS4 Coexpression,920;Enrichr Queries,1280;GTEx Coexpression,483	MYOD1
gene_set_query	1124	HOXA4	894.3	ARCHS4 Coexpression,918;Enrichr Queries,591;GTEx Coexpression,1174	PRDM1
gene_set_query	1125	NR1I3	894.7	ARCHS4 Coexpression,1041;Enrichr Queries,833;GTEx Coexpression,810	ESR1
gene_set_query	1126	TIGD5	895	ARCHS4 Coexpression,1215;Enrichr Queries,1033;GTEx Coexpression,437	ZNF584
gene_set_query	1127	BHLHE23	895	ARCHS4 Coexpression,841;GTEx Coexpression,949
gene_set_query	1128	TGIF2LX	895.3	ARCHS4 Coexpression,1022;Enrichr Queries,69;GTEx Coexpression,1595	SMAD4,MYOD1,PRDM1,ESR1,TP63
gene_set_query	1129	HOXC5	895.3	ARCHS4 Coexpression,1035;Enrichr Queries,1343;GTEx Coexpression,308	ZZZ3
gene_set_query	1130	ZNF670	896	ARCHS4 Coexpression,450;Enrichr Queries,1342	ARID2
gene_set_query	1131	ARID3C	897.5	ARCHS4 Coexpression,1018;GTEx Coexpression,777
gene_set_query	1132	DNTTIP1	897.5	ARCHS4 Coexpression,1026;GTEx Coexpression,769
gene_set_query	1133	NKX24	897.5	ARCHS4 Coexpression,584;GTEx Coexpression,1211	REST
gene_set_query	1134	PTF1A	897.7	ARCHS4 Coexpression,1427;Enrichr Queries,266;GTEx Coexpression,1000	MYOD1,ESR1
gene_set_query	1135	ONECUT2	898.7	ARCHS4 Coexpression,604;Enrichr Queries,1231;GTEx Coexpression,861	CXXC4
gene_set_query	1136	NHLH1	898.7	ARCHS4 Coexpression,741;Enrichr Queries,1217;GTEx Coexpression,738
gene_set_query	1137	MIXL1	901.3	ARCHS4 Coexpression,1127;Enrichr Queries,607;GTEx Coexpression,970	PRDM1
gene_set_query	1138	MYT1	902.3	ARCHS4 Coexpression,1374;Enrichr Queries,512;GTEx Coexpression,821	SETBP1,CXXC4
gene_set_query	1139	ZNF41	904	ARCHS4 Coexpression,869;Enrichr Queries,466;GTEx Coexpression,1377	ZNF507,ASH1L
gene_set_query	1140	ZNF536	904.7	ARCHS4 Coexpression,614;Enrichr Queries,818;GTEx Coexpression,1282	SETBP1,TCF4
gene_set_query	1141	IRF9	904.8	ARCHS4 Coexpression,800;Enrichr Queries,1392;ReMap ChIP-seq,106;GTEx Coexpression,1321	RFX7
gene_set_query	1142	ZNF346	905.3	ARCHS4 Coexpression,1352;Enrichr Queries,907;GTEx Coexpression,457	NRF1,BPTF
gene_set_query	1143	TGIF1	905.3	ARCHS4 Coexpression,1221;Enrichr Queries,873;GTEx Coexpression,622	PRDM1,CXXC4
gene_set_query	1144	SALL2	907	ARCHS4 Coexpression,701;Enrichr Queries,1261;GTEx Coexpression,759
gene_set_query	1145	ZNF831	907.7	ARCHS4 Coexpression,1380;Enrichr Queries,544;GTEx Coexpression,799	PRDM1
gene_set_query	1146	ZSCAN20	908	ARCHS4 Coexpression,865;Enrichr Queries,523;GTEx Coexpression,1336	SPEN,SETBP1
gene_set_query	1147	SCML4	908.3	ARCHS4 Coexpression,1296;Enrichr Queries,521;GTEx Coexpression,908	PRDM1,ESR1
gene_set_query	1148	RXRG	909	ARCHS4 Coexpression,1027;Enrichr Queries,718;GTEx Coexpression,982	ESR1
gene_set_query	1149	GTF2IRD2B	909.3	ARCHS4 Coexpression,1403;Enrichr Queries,1282;GTEx Coexpression,43	SMAD4,SETBP1,PRDM5,XPA
gene_set_query	1150	ZKSCAN5	910	ARCHS4 Coexpression,276;Enrichr Queries,1200;GTEx Coexpression,1254	ZNF8
gene_set_query	1151	ZNF784	910.7	ARCHS4 Coexpression,1355;Enrichr Queries,540;GTEx Coexpression,837	PRDM1
gene_set_query	1152	THAP7	911.3	ARCHS4 Coexpression,839;Enrichr Queries,1026;GTEx Coexpression,869
gene_set_query	1153	ZNF438	913	ARCHS4 Coexpression,1481;Enrichr Queries,412;GTEx Coexpression,846	SETBP1,PRDM1
gene_set_query	1154	HOXB13	914.3	ARCHS4 Coexpression,690;Enrichr Queries,1356;ReMap ChIP-seq,21;GTEx Coexpression,1590	SMAD4,ZNF507,ARID2
gene_set_query	1155	TBX3	915.5	Literature ChIP-seq,43;ARCHS4 Coexpression,1266;Enrichr Queries,780;GTEx Coexpression,1573	PRDM5,PRDM1,NRF1
gene_set_query	1156	ZNF385D	915.7	ARCHS4 Coexpression,1253;Enrichr Queries,957;GTEx Coexpression,537	SETBP1,ZBTB10
gene_set_query	1157	ZNF76	917	ARCHS4 Coexpression,1433;Enrichr Queries,1028;GTEx Coexpression,290	ZNF83
gene_set_query	1158	NR2E3	917.5	ARCHS4 Coexpression,1487;Enrichr Queries,348	PRDM1,ESR1
gene_set_query	1159	ZNF20	918	ARCHS4 Coexpression,491;Enrichr Queries,913;GTEx Coexpression,1350	PRDM1,ZNF8
gene_set_query	1160	ARHGAP35	919.5	ARCHS4 Coexpression,305;GTEx Coexpression,1534	TCF20
gene_set_query	1161	HMG20B	920	ARCHS4 Coexpression,884;Enrichr Queries,1048;GTEx Coexpression,828
gene_set_query	1162	NFE2L3	920	ARCHS4 Coexpression,569;Enrichr Queries,825;GTEx Coexpression,1366	TCF20,PRDM1
gene_set_query	1163	SNAI1	921	ARCHS4 Coexpression,837;Enrichr Queries,674;GTEx Coexpression,1252	PRDM1
gene_set_query	1164	MAFG	921.8	ARCHS4 Coexpression,1142;Enrichr Queries,1087;ReMap ChIP-seq,56;GTEx Coexpression,1402	SPEN,PRDM1
gene_set_query	1165	ZNF534	923	ARCHS4 Coexpression,792;GTEx Coexpression,1054
gene_set_query	1166	ZNF517	923.3	ARCHS4 Coexpression,300;Enrichr Queries,1139;GTEx Coexpression,1331	ZNF8
gene_set_query	1167	ZNF688	923.3	ARCHS4 Coexpression,1151;Enrichr Queries,541;GTEx Coexpression,1078	PRDM1
gene_set_query	1168	MEF2D	923.7	ARCHS4 Coexpression,1344;Enrichr Queries,926;GTEx Coexpression,501	SPEN,SETBP1
gene_set_query	1169	ZFP2	924	ARCHS4 Coexpression,1347;Enrichr Queries,1237;GTEx Coexpression,188	MECP2,KMT2A
gene_set_query	1170	BCL6B	924	ARCHS4 Coexpression,1614;Enrichr Queries,665;GTEx Coexpression,493	TCF4,PRDM1
gene_set_query	1171	NRL	924.7	ARCHS4 Coexpression,1207;Enrichr Queries,270;GTEx Coexpression,1297	PRDM1,ESR1
gene_set_query	1172	ZFP42	924.8	Literature ChIP-seq,29;ARCHS4 Coexpression,1408;Enrichr Queries,848;GTEx Coexpression,1414	REST,XPA,TCF4,PRDM1
gene_set_query	1173	ZNF322	926	ARCHS4 Coexpression,1528;GTEx Coexpression,324	ZZZ3
gene_set_query	1174	ZBTB46	926	ARCHS4 Coexpression,681;Enrichr Queries,892;GTEx Coexpression,1205	PRDM1
gene_set_query	1175	GZF1	926	ARCHS4 Coexpression,561;Enrichr Queries,943;GTEx Coexpression,1274	ZBTB10,TCF20
gene_set_query	1176	CAMTA1	926.3	ARCHS4 Coexpression,1198;Enrichr Queries,473;GTEx Coexpression,1108	SETBP1,ESR1
gene_set_query	1177	BORCS8MEF2B	927	ARCHS4 Coexpression,927
gene_set_query	1178	ARID5B	928.7	ARCHS4 Coexpression,1251;Enrichr Queries,696;GTEx Coexpression,839	PRDM1
gene_set_query	1179	INSM2	928.7	ARCHS4 Coexpression,873;Enrichr Queries,1035;GTEx Coexpression,878
gene_set_query	1180	ZNF341	929	ARCHS4 Coexpression,879;Enrichr Queries,982;GTEx Coexpression,926	PRDM1
gene_set_query	1181	NEUROG2	930.3	ARCHS4 Coexpression,1273;Enrichr Queries,556;GTEx Coexpression,962	PRDM1
gene_set_query	1182	ZNF671	930.7	ARCHS4 Coexpression,1013;Enrichr Queries,862;GTEx Coexpression,917	PRDM1
gene_set_query	1183	SP6	930.7	ARCHS4 Coexpression,1385;Enrichr Queries,773;GTEx Coexpression,634	PRDM1,TP63
gene_set_query	1184	CUX2	931	ARCHS4 Coexpression,544;Enrichr Queries,729;GTEx Coexpression,1520	SETBP1,TCF4
gene_set_query	1185	ETV5	931	ARCHS4 Coexpression,870;Enrichr Queries,763;GTEx Coexpression,1160	PRDM1
gene_set_query	1186	ZNF267	931.7	ARCHS4 Coexpression,1379;Enrichr Queries,692;GTEx Coexpression,724	PRDM1
gene_set_query	1187	ZNF205	932	ARCHS4 Coexpression,903;Enrichr Queries,1101;GTEx Coexpression,792
gene_set_query	1188	TFDP2	932.7	ARCHS4 Coexpression,123;Enrichr Queries,1103;GTEx Coexpression,1572	ZNF8,BPTF
gene_set_query	1189	PLSCR1	933	ARCHS4 Coexpression,1021;GTEx Coexpression,845
gene_set_query	1190	ZNF883	933	ARCHS4 Coexpression,275;GTEx Coexpression,1591	TCF4
gene_set_query	1191	NKRF	933.3	ARCHS4 Coexpression,645;Enrichr Queries,1147;GTEx Coexpression,1008	SPEN
gene_set_query	1192	ZNF415	933.7	ARCHS4 Coexpression,1114;Enrichr Queries,940;GTEx Coexpression,747	ZNF83
gene_set_query	1193	ZNF598	934.3	ARCHS4 Coexpression,988;Enrichr Queries,1069;GTEx Coexpression,746
gene_set_query	1194	CSRNP1	935	ARCHS4 Coexpression,697;GTEx Coexpression,1173
gene_set_query	1195	ARGFX	935.3	ARCHS4 Coexpression,1284;Enrichr Queries,224;GTEx Coexpression,1298	REST,ESR1,TP63
gene_set_query	1196	MBD3	935.5	ARCHS4 Coexpression,1194;Enrichr Queries,1100;ReMap ChIP-seq,42;GTEx Coexpression,1406	ZNF584,ESR1
gene_set_query	1197	ZIC5	935.7	ARCHS4 Coexpression,479;Enrichr Queries,1256;GTEx Coexpression,1072	BPTF
gene_set_query	1198	NKX22	938.5	ARCHS4 Coexpression,638;GTEx Coexpression,1239	CXXC4
gene_set_query	1199	CREB3L3	939	ARCHS4 Coexpression,836;Enrichr Queries,1116;GTEx Coexpression,865
gene_set_query	1200	CHCHD3	940	ARCHS4 Coexpression,1005;GTEx Coexpression,875
gene_set_query	1201	ZSCAN5C	941.7	ARCHS4 Coexpression,1084;Enrichr Queries,1018;GTEx Coexpression,723
gene_set_query	1202	GLIS2	941.7	ARCHS4 Coexpression,1565;Enrichr Queries,1088;GTEx Coexpression,172	PRDM5,ZBTB10
gene_set_query	1203	ZNF275	943	ARCHS4 Coexpression,113;Enrichr Queries,1193;GTEx Coexpression,1523	SPEN,KMT2A
gene_set_query	1204	RFX6	943.3	ARCHS4 Coexpression,565;Enrichr Queries,770;GTEx Coexpression,1495	CXXC4
gene_set_query	1205	ASCL5	943.5	ARCHS4 Coexpression,1125;GTEx Coexpression,762
gene_set_query	1206	ZNF614	943.5	ARCHS4 Coexpression,1460;GTEx Coexpression,427	ZNF507
gene_set_query	1207	NR1H2	943.8	ARCHS4 Coexpression,1208;Enrichr Queries,1060;ReMap ChIP-seq,119;GTEx Coexpression,1388	ARID2
gene_set_query	1208	ZNF792	944	ARCHS4 Coexpression,687;Enrichr Queries,785;GTEx Coexpression,1360	PRDM1
gene_set_query	1209	ZNF581	945.7	ARCHS4 Coexpression,710;Enrichr Queries,1398;GTEx Coexpression,729
gene_set_query	1210	THRA	946	Literature ChIP-seq,62;ARCHS4 Coexpression,1599;Enrichr Queries,681;GTEx Coexpression,1442	ARID2,ESR1
gene_set_query	1211	ESRRG	947	ARCHS4 Coexpression,487;Enrichr Queries,883;GTEx Coexpression,1471	ESR1,CXXC4
gene_set_query	1212	ZIM3	947.3	ARCHS4 Coexpression,827;Enrichr Queries,1133;GTEx Coexpression,882
gene_set_query	1213	BNC2	948	ARCHS4 Coexpression,1245;Enrichr Queries,1387;GTEx Coexpression,212	SMAD4,PRDM5
gene_set_query	1214	GTF3A	949.3	ARCHS4 Coexpression,702;Enrichr Queries,1056;GTEx Coexpression,1090
gene_set_query	1215	DBP	950.3	ARCHS4 Coexpression,654;Enrichr Queries,1232;GTEx Coexpression,965	ZNF8
gene_set_query	1216	ZNF578	951.3	ARCHS4 Coexpression,1572;Enrichr Queries,927;GTEx Coexpression,355	REST,ZNF83
gene_set_query	1217	ZNF860	951.5	ARCHS4 Coexpression,1320;GTEx Coexpression,583	PRDM1
gene_set_query	1218	SHOX	951.7	ARCHS4 Coexpression,1342;Enrichr Queries,171;GTEx Coexpression,1342	MYOD1,PRDM1,ESR1
gene_set_query	1219	EBF4	952	ARCHS4 Coexpression,1502;Enrichr Queries,1254;GTEx Coexpression,100	ZNF83,XPA,SMAD9
gene_set_query	1220	MLX	954	ARCHS4 Coexpression,589;Enrichr Queries,1049;GTEx Coexpression,1224	BPTF
gene_set_query	1221	ZNF888	954	GTEx Coexpression,954
gene_set_query	1222	ZNF595	954	ARCHS4 Coexpression,1333;Enrichr Queries,575	PRDM1
gene_set_query	1223	THYN1	954.5	ARCHS4 Coexpression,1076;GTEx Coexpression,833
gene_set_query	1224	TFE3	954.7	ARCHS4 Coexpression,799;Enrichr Queries,990;GTEx Coexpression,1075
gene_set_query	1225	ZBTB49	955	ARCHS4 Coexpression,1213;GTEx Coexpression,697	NRF1
gene_set_query	1226	ZNF821	955	ARCHS4 Coexpression,818;Enrichr Queries,971;GTEx Coexpression,1076	PRDM1
gene_set_query	1227	DMRT2	955.3	ARCHS4 Coexpression,724;Enrichr Queries,759;GTEx Coexpression,1383	ESR1
gene_set_query	1228	ZNF540	955.3	ARCHS4 Coexpression,1147;Enrichr Queries,919;GTEx Coexpression,800	ZNF83
gene_set_query	1229	SPDEF	956.7	ARCHS4 Coexpression,519;Enrichr Queries,802;GTEx Coexpression,1549	ESR1
gene_set_query	1230	EGR4	957	ARCHS4 Coexpression,945;Enrichr Queries,1086;GTEx Coexpression,840
gene_set_query	1231	EN2	957.7	ARCHS4 Coexpression,609;Enrichr Queries,1362;GTEx Coexpression,902	CXXC4
gene_set_query	1232	NFATC2	958	ARCHS4 Coexpression,1414;Enrichr Queries,720;GTEx Coexpression,740	PRDM1
gene_set_query	1233	ZNF226	958.3	ARCHS4 Coexpression,1504;Enrichr Queries,947;GTEx Coexpression,424	ZNF83
gene_set_query	1234	ZNF878	959	ARCHS4 Coexpression,791;GTEx Coexpression,1127
gene_set_query	1235	FOXR1	960	ARCHS4 Coexpression,1360;Enrichr Queries,561;GTEx Coexpression,959	PRDM1
gene_set_query	1236	MYBL1	961.3	Literature ChIP-seq,154;ARCHS4 Coexpression,1526;Enrichr Queries,1266;GTEx Coexpression,899
gene_set_query	1237	GFI1	961.3	ARCHS4 Coexpression,768;Enrichr Queries,974;GTEx Coexpression,1142	PRDM1
gene_set_query	1238	HSF4	961.7	ARCHS4 Coexpression,1559;Enrichr Queries,1023;GTEx Coexpression,303	ZNF83
gene_set_query	1239	KLF16	962.3	ARCHS4 Coexpression,1372;Enrichr Queries,1059;GTEx Coexpression,456	SMAD4
gene_set_query	1240	KLF2	962.5	Literature ChIP-seq,37;ARCHS4 Coexpression,1401;Enrichr Queries,1164;GTEx Coexpression,1248	PRDM1
gene_set_query	1241	CREB3L4	963.3	ARCHS4 Coexpression,539;Enrichr Queries,793;GTEx Coexpression,1558	ESR1
gene_set_query	1242	ZNF710	964	ARCHS4 Coexpression,742;Enrichr Queries,895;GTEx Coexpression,1255	PRDM1
gene_set_query	1243	ZNF385A	964	ARCHS4 Coexpression,1393;Enrichr Queries,908;GTEx Coexpression,591	PRDM1,TP63
gene_set_query	1244	ZNF468	965.3	ARCHS4 Coexpression,1488;Enrichr Queries,621;GTEx Coexpression,787	ZNF83
gene_set_query	1245	ZBTB2	966.7	ARCHS4 Coexpression,1218;Enrichr Queries,1168;GTEx Coexpression,514	REST
gene_set_query	1246	HES3	968.3	ARCHS4 Coexpression,786;Enrichr Queries,1304;GTEx Coexpression,815
gene_set_query	1247	DMRTB1	968.3	ARCHS4 Coexpression,1149;Enrichr Queries,602;GTEx Coexpression,1154	PRDM1
gene_set_query	1248	FOXJ1	971.3	ARCHS4 Coexpression,936;Enrichr Queries,1084;GTEx Coexpression,894
gene_set_query	1249	ZNF692	972	ARCHS4 Coexpression,1435;Enrichr Queries,1152;GTEx Coexpression,329	ZNF83
gene_set_query	1250	ARX	972	ARCHS4 Coexpression,174;Enrichr Queries,1241;GTEx Coexpression,1501	TCF4,CXXC4
gene_set_query	1251	TEAD3	972.7	ARCHS4 Coexpression,1200;Enrichr Queries,1233;GTEx Coexpression,485	SETBP1
gene_set_query	1252	ZNF474	973	ARCHS4 Coexpression,773;Enrichr Queries,572;GTEx Coexpression,1574	PRDM1
gene_set_query	1253	POU1F1	975	ARCHS4 Coexpression,1511;Enrichr Queries,103;GTEx Coexpression,1311	MYOD1,PRDM1,ESR1,TP63
gene_set_query	1254	ZNF648	975	ARCHS4 Coexpression,1254;Enrichr Queries,939;GTEx Coexpression,732	ESR1
gene_set_query	1255	HOXC10	975.7	ARCHS4 Coexpression,1103;Enrichr Queries,1243;GTEx Coexpression,581	MYOD1
gene_set_query	1256	ZNF579	976	ARCHS4 Coexpression,1168;Enrichr Queries,1354;GTEx Coexpression,406	MYOD1
gene_set_query	1257	ERF	976.7	ARCHS4 Coexpression,1034;Enrichr Queries,1144;GTEx Coexpression,752
gene_set_query	1258	HOXB5	977	ARCHS4 Coexpression,1317;Enrichr Queries,679;GTEx Coexpression,935	PRDM1
gene_set_query	1259	E4F1	977.3	Literature ChIP-seq,163;ARCHS4 Coexpression,1172;Enrichr Queries,999;GTEx Coexpression,1575
gene_set_query	1260	ZNF691	977.3	ARCHS4 Coexpression,1016;Enrichr Queries,1053;GTEx Coexpression,863
gene_set_query	1261	ATMIN	977.3	ARCHS4 Coexpression,412;Enrichr Queries,1128;GTEx Coexpression,1392	TCF20
gene_set_query	1262	SOX21	977.3	ARCHS4 Coexpression,1095;Enrichr Queries,1250;GTEx Coexpression,587	TP63
gene_set_query	1263	RHOXF2	978	ARCHS4 Coexpression,1134;Enrichr Queries,391;GTEx Coexpression,1409	ESR1,TP63
gene_set_query	1264	ZFP69	979	ARCHS4 Coexpression,520;GTEx Coexpression,1438	RFX7
gene_set_query	1265	KLF7	979.7	ARCHS4 Coexpression,581;Enrichr Queries,840;GTEx Coexpression,1518	TCF4,PRDM1
gene_set_query	1266	SIX6	980.3	ARCHS4 Coexpression,1045;Enrichr Queries,547;GTEx Coexpression,1349	PRDM1
gene_set_query	1267	ZNF664	980.7	ARCHS4 Coexpression,428;Enrichr Queries,976;GTEx Coexpression,1538	TCF20,BPTF
gene_set_query	1268	MYRFL	981.5	ARCHS4 Coexpression,713;GTEx Coexpression,1250
gene_set_query	1269	ZNF319	982.7	ARCHS4 Coexpression,1255;Enrichr Queries,958;GTEx Coexpression,735	PRDM1
gene_set_query	1270	ZNF230	982.7	ARCHS4 Coexpression,1011;Enrichr Queries,925;GTEx Coexpression,1012	ZNF83
gene_set_query	1271	ELF4	983.3	ARCHS4 Coexpression,1010;Enrichr Queries,836;GTEx Coexpression,1104	PRDM1
gene_set_query	1272	FOXA3	984.7	ARCHS4 Coexpression,946;Enrichr Queries,1058;GTEx Coexpression,950
gene_set_query	1273	ZNF423	986	ARCHS4 Coexpression,1420;Enrichr Queries,581;GTEx Coexpression,957	SETBP1
gene_set_query	1274	IRF7	986.3	ARCHS4 Coexpression,790;Enrichr Queries,1024;GTEx Coexpression,1145
gene_set_query	1275	ZSCAN31	987	ARCHS4 Coexpression,1382;GTEx Coexpression,592	SMAD9
gene_set_query	1276	E2F2	988.3	ARCHS4 Coexpression,990;Enrichr Queries,1057;GTEx Coexpression,918
gene_set_query	1277	ZNF718	990.3	ARCHS4 Coexpression,1623;Enrichr Queries,977;GTEx Coexpression,371	ZZZ3,ZNF83
gene_set_query	1278	AHRR	991	ARCHS4 Coexpression,1039;GTEx Coexpression,943
gene_set_query	1279	POGK	991.3	ARCHS4 Coexpression,387;Enrichr Queries,1090;GTEx Coexpression,1497	TCF20
gene_set_query	1280	SALL3	991.7	ARCHS4 Coexpression,99;Enrichr Queries,1348;GTEx Coexpression,1528	TCF4,BPTF
gene_set_query	1281	ZNF219	992	ARCHS4 Coexpression,706;Enrichr Queries,1123;GTEx Coexpression,1147
gene_set_query	1282	ZBED3	994	ARCHS4 Coexpression,214;Enrichr Queries,1303;GTEx Coexpression,1465	RFX7
gene_set_query	1283	NHLH2	994	ARCHS4 Coexpression,978;Enrichr Queries,1199;GTEx Coexpression,805
gene_set_query	1284	NR2F1	994.5	ARCHS4 Coexpression,1276;Enrichr Queries,1236;ReMap ChIP-seq,253;GTEx Coexpression,1213
gene_set_query	1285	ZNF576	994.7	ARCHS4 Coexpression,592;Enrichr Queries,1114;GTEx Coexpression,1278	TCF20
gene_set_query	1286	ZNF365	996	ARCHS4 Coexpression,872;Enrichr Queries,870;GTEx Coexpression,1246	PRDM1
gene_set_query	1287	WIZ	997.3	ARCHS4 Coexpression,1307;Enrichr Queries,454;GTEx Coexpression,1231	SPEN,KMT2A
gene_set_query	1288	HOXA10	998.7	ARCHS4 Coexpression,1388;Enrichr Queries,1141;GTEx Coexpression,467	MYOD1
gene_set_query	1289	POU5F1B	999.5	ARCHS4 Coexpression,783;GTEx Coexpression,1216
gene_set_query	1290	ZNF555	1001	ARCHS4 Coexpression,666;Enrichr Queries,950;GTEx Coexpression,1387	ZNF8
gene_set_query	1291	CHAMP1	1003	ARCHS4 Coexpression,649;GTEx Coexpression,1356	TCF20
gene_set_query	1292	DEAF1	1003	ARCHS4 Coexpression,1601;Enrichr Queries,1253;ReMap ChIP-seq,265;GTEx Coexpression,892
gene_set_query	1293	RBSN	1004	ARCHS4 Coexpression,580;GTEx Coexpression,1427	ZNF8
gene_set_query	1294	NEUROD6	1005	ARCHS4 Coexpression,439;Enrichr Queries,1093;GTEx Coexpression,1482	TCF4
gene_set_query	1295	POU3F4	1005	ARCHS4 Coexpression,529;Enrichr Queries,1174;GTEx Coexpression,1312	CXXC4
gene_set_query	1296	FOXD4L4	1005	ARCHS4 Coexpression,798;GTEx Coexpression,1212
gene_set_query	1297	DRGX	1006	ARCHS4 Coexpression,1067;Enrichr Queries,354;GTEx Coexpression,1598	MYOD1,PRDM1
gene_set_query	1298	DLX6	1008	ARCHS4 Coexpression,346;Enrichr Queries,1364;GTEx Coexpression,1313	TCF4
gene_set_query	1299	ZNF683	1008	ARCHS4 Coexpression,961;Enrichr Queries,528;GTEx Coexpression,1535	PRDM1
gene_set_query	1300	DMRTA2	1010	ARCHS4 Coexpression,551;Enrichr Queries,1324;GTEx Coexpression,1156	CXXC4
gene_set_query	1301	SMYD3	1013	ARCHS4 Coexpression,1241;GTEx Coexpression,784
gene_set_query	1302	LIN28A	1013	ARCHS4 Coexpression,719;GTEx Coexpression,1306
gene_set_query	1303	ZNF77	1013	ARCHS4 Coexpression,1516;Enrichr Queries,897;GTEx Coexpression,625	ZNF584,ZNF83
gene_set_query	1304	CIC	1013	ARCHS4 Coexpression,1551;Enrichr Queries,518;GTEx Coexpression,971	SPEN,KMT2A
gene_set_query	1305	NAIF1	1014	ARCHS4 Coexpression,1155;GTEx Coexpression,872
gene_set_query	1306	VAX2	1014	ARCHS4 Coexpression,1381;Enrichr Queries,551;GTEx Coexpression,1109	PRDM1
gene_set_query	1307	E2F8	1014	ARCHS4 Coexpression,958;Enrichr Queries,1186;GTEx Coexpression,898
gene_set_query	1308	FOXD2	1014	ARCHS4 Coexpression,1046;Enrichr Queries,829;GTEx Coexpression,1167	PRDM1
gene_set_query	1309	KLF10	1015	ARCHS4 Coexpression,1189;Enrichr Queries,1188;GTEx Coexpression,669	MYOD1
gene_set_query	1310	ZNF607	1017	ARCHS4 Coexpression,1093;Enrichr Queries,762;GTEx Coexpression,1195	ZNF83
gene_set_query	1311	KLF17	1017	ARCHS4 Coexpression,1206;Enrichr Queries,336;GTEx Coexpression,1508	PRDM1,ESR1
gene_set_query	1312	DLX1	1017	ARCHS4 Coexpression,343;Enrichr Queries,1258;GTEx Coexpression,1450	TCF4
gene_set_query	1313	IRF5	1018	ARCHS4 Coexpression,996;Enrichr Queries,962;GTEx Coexpression,1095	PRDM1
gene_set_query	1314	NR6A1	1020	ARCHS4 Coexpression,1169;Enrichr Queries,667;GTEx Coexpression,1225	PRDM1
gene_set_query	1315	TCF24	1020	ARCHS4 Coexpression,1214;Enrichr Queries,1110;GTEx Coexpression,737
gene_set_query	1316	HOXA5	1021	ARCHS4 Coexpression,330;Enrichr Queries,1155;GTEx Coexpression,1578	SPEN
gene_set_query	1317	ZNF410	1021	ARCHS4 Coexpression,1574;Enrichr Queries,1125;GTEx Coexpression,364	ARID2
gene_set_query	1318	ZNF513	1021	ARCHS4 Coexpression,845;Enrichr Queries,706;GTEx Coexpression,1513	PRDM1
gene_set_query	1319	TBX2	1022	ARCHS4 Coexpression,596;Enrichr Queries,1132;GTEx Coexpression,1337	ESR1
gene_set_query	1320	MKX	1022	ARCHS4 Coexpression,1564;Enrichr Queries,1216;GTEx Coexpression,286	SETBP1
gene_set_query	1321	HOXD1	1023	ARCHS4 Coexpression,1088;Enrichr Queries,580;GTEx Coexpression,1401	PRDM1
gene_set_query	1322	ZMAT4	1023	ARCHS4 Coexpression,962;Enrichr Queries,1194;GTEx Coexpression,913
gene_set_query	1323	NPAS4	1024	ARCHS4 Coexpression,1106;Enrichr Queries,1096;GTEx Coexpression,871
gene_set_query	1324	PA2G4	1025	ARCHS4 Coexpression,1161;GTEx Coexpression,888
gene_set_query	1325	ZNF189	1025	ARCHS4 Coexpression,600;Enrichr Queries,1320;GTEx Coexpression,1155	SMAD4
gene_set_query	1326	AKNA	1026	ARCHS4 Coexpression,1086;Enrichr Queries,1001;GTEx Coexpression,991
gene_set_query	1327	NKX31	1027	ARCHS4 Coexpression,527;GTEx Coexpression,1526	ZBTB10
gene_set_query	1328	ZNF235	1027	ARCHS4 Coexpression,1610;Enrichr Queries,899;GTEx Coexpression,572	KMT2A,SETBP1
gene_set_query	1329	FOXF1	1028	ARCHS4 Coexpression,1464;Enrichr Queries,712;GTEx Coexpression,909	PRDM1
gene_set_query	1330	ZIM2	1033	ARCHS4 Coexpression,980;Enrichr Queries,513;GTEx Coexpression,1606	SETBP1,ESR1
gene_set_query	1331	TIGD3	1033	ARCHS4 Coexpression,844;Enrichr Queries,1073;GTEx Coexpression,1182
gene_set_query	1332	ZNF541	1034	ARCHS4 Coexpression,1140;Enrichr Queries,1113;GTEx Coexpression,848
gene_set_query	1333	ATF5	1034	ARCHS4 Coexpression,1132;Enrichr Queries,1119;GTEx Coexpression,851
gene_set_query	1334	ZNF25	1036	ARCHS4 Coexpression,951;Enrichr Queries,1196;GTEx Coexpression,960
gene_set_query	1335	ZNF282	1036	ARCHS4 Coexpression,888;Enrichr Queries,1055;GTEx Coexpression,1164
gene_set_query	1336	NFE2L1	1037	ARCHS4 Coexpression,1449;Enrichr Queries,1091;ReMap ChIP-seq,288;GTEx Coexpression,1318
gene_set_query	1337	ZNF689	1037	ARCHS4 Coexpression,901;Enrichr Queries,910;GTEx Coexpression,1299	PRDM1
gene_set_query	1338	ZIC1	1037	ARCHS4 Coexpression,1493;Enrichr Queries,613;GTEx Coexpression,1004	PRDM1
gene_set_query	1339	MXD1	1037	ARCHS4 Coexpression,1306;Enrichr Queries,849;GTEx Coexpression,956	PRDM1
gene_set_query	1340	ZNF362	1038	ARCHS4 Coexpression,1501;Enrichr Queries,1224;GTEx Coexpression,389	SETBP1
gene_set_query	1341	ZNF114	1040	ARCHS4 Coexpression,1417;Enrichr Queries,1137;GTEx Coexpression,565	SMAD9
gene_set_query	1342	ZNF746	1041	ARCHS4 Coexpression,709;Enrichr Queries,1252;GTEx Coexpression,1162
gene_set_query	1343	YBX1	1041	ARCHS4 Coexpression,651;Enrichr Queries,1047;GTEx Coexpression,1425	TCF20
gene_set_query	1344	ZNF35	1042	ARCHS4 Coexpression,1193;Enrichr Queries,863;GTEx Coexpression,1070	PRDM1
gene_set_query	1345	ZNF358	1042	ARCHS4 Coexpression,1540;Enrichr Queries,1287;GTEx Coexpression,299	TCF20
gene_set_query	1346	ZNF564	1042	ARCHS4 Coexpression,1044;Enrichr Queries,879;GTEx Coexpression,1204	ZNF83
gene_set_query	1347	HES4	1042	ARCHS4 Coexpression,1426;Enrichr Queries,1397;GTEx Coexpression,304	ZBTB10
gene_set_query	1348	PCGF6	1044	ARCHS4 Coexpression,1398;Enrichr Queries,1077;GTEx Coexpression,657	ZNF507
gene_set_query	1349	PBX4	1044	ARCHS4 Coexpression,1129;Enrichr Queries,969;GTEx Coexpression,1034	PRDM1
gene_set_query	1350	ZNF155	1044	ARCHS4 Coexpression,1523;Enrichr Queries,586;GTEx Coexpression,1024	ZNF83
gene_set_query	1351	ZNF487	1046	ARCHS4 Coexpression,448;Enrichr Queries,1108;GTEx Coexpression,1582	PRDM1
gene_set_query	1352	CBLL2	1046	ARCHS4 Coexpression,1081;Enrichr Queries,458;GTEx Coexpression,1600	ESR1,TP63
gene_set_query	1353	ZSCAN18	1047	ARCHS4 Coexpression,1558;Enrichr Queries,941;GTEx Coexpression,643	SETBP1,CXXC4
gene_set_query	1354	PRRX1	1048	ARCHS4 Coexpression,1483;Enrichr Queries,1339;GTEx Coexpression,321	ZZZ3
gene_set_query	1355	DPRX	1048	ARCHS4 Coexpression,1486;Enrichr Queries,92;GTEx Coexpression,1566	MYOD1,PRDM1,ESR1,TP63
gene_set_query	1356	KCMF1	1049	ARCHS4 Coexpression,543;Enrichr Queries,1037;GTEx Coexpression,1567	TCF20
gene_set_query	1357	SP5	1050	ARCHS4 Coexpression,1422;Enrichr Queries,1107;GTEx Coexpression,621	TP63
gene_set_query	1358	ZNF771	1050	ARCHS4 Coexpression,506;Enrichr Queries,1355;GTEx Coexpression,1289	ZNF8
gene_set_query	1359	PRDM6	1054	ARCHS4 Coexpression,1476;Enrichr Queries,319;GTEx Coexpression,1367	PRDM1,ESR1
gene_set_query	1360	FOXD4	1056	ARCHS4 Coexpression,1025;Enrichr Queries,1379;GTEx Coexpression,765
gene_set_query	1361	ZNF22	1057	ARCHS4 Coexpression,1416;Enrichr Queries,1344;GTEx Coexpression,410	TP63
gene_set_query	1362	MXD3	1057	ARCHS4 Coexpression,1119;Enrichr Queries,1027;GTEx Coexpression,1026
gene_set_query	1363	TIGD2	1059	ARCHS4 Coexpression,1310;Enrichr Queries,1095;GTEx Coexpression,773
gene_set_query	1364	THAP10	1061	ARCHS4 Coexpression,1121;Enrichr Queries,1292;GTEx Coexpression,770
gene_set_query	1365	CREB3L1	1062	ARCHS4 Coexpression,1607;Enrichr Queries,1337;ReMap ChIP-seq,113;GTEx Coexpression,1189	SPEN
gene_set_query	1366	DACH2	1064	ARCHS4 Coexpression,831;Enrichr Queries,991;GTEx Coexpression,1371
gene_set_query	1367	ZNF90	1065	ARCHS4 Coexpression,466;Enrichr Queries,1349;GTEx Coexpression,1380	ZNF8
gene_set_query	1368	SNAPC5	1066	ARCHS4 Coexpression,602;GTEx Coexpression,1530	TCF20
gene_set_query	1369	HSF5	1067	ARCHS4 Coexpression,935;Enrichr Queries,710;GTEx Coexpression,1556	PRDM1
gene_set_query	1370	THAP8	1068	ARCHS4 Coexpression,803;Enrichr Queries,986;GTEx Coexpression,1416
gene_set_query	1371	SOX18	1069	ARCHS4 Coexpression,1617;Enrichr Queries,1176;GTEx Coexpression,413	TCF4
gene_set_query	1372	HSFX2	1069	ARCHS4 Coexpression,1069
gene_set_query	1373	SKOR1	1070	ARCHS4 Coexpression,1123;GTEx Coexpression,1016
gene_set_query	1374	ZNF879	1071	ARCHS4 Coexpression,1485;GTEx Coexpression,656	ZNF507
gene_set_query	1375	SEBOX	1073	ARCHS4 Coexpression,1237;Enrichr Queries,909	ESR1
gene_set_query	1376	ZSCAN21	1073	ARCHS4 Coexpression,1281;Enrichr Queries,1159;GTEx Coexpression,779
gene_set_query	1377	LHX5	1074	ARCHS4 Coexpression,1107;Enrichr Queries,1366;GTEx Coexpression,748
gene_set_query	1378	HOXB8	1075	ARCHS4 Coexpression,1019;Enrichr Queries,736;GTEx Coexpression,1469	PRDM1
gene_set_query	1379	DBX1	1075	ARCHS4 Coexpression,655;Enrichr Queries,1357;GTEx Coexpression,1214	CXXC4
gene_set_query	1380	HESX1	1075	ARCHS4 Coexpression,1156;Enrichr Queries,929;GTEx Coexpression,1141	PRDM1
gene_set_query	1381	TBX20	1076	ARCHS4 Coexpression,1615;Enrichr Queries,552;GTEx Coexpression,1060	PRDM1
gene_set_query	1382	ZNF18	1076	ARCHS4 Coexpression,1238;Enrichr Queries,841;GTEx Coexpression,1149	PRDM1
gene_set_query	1383	TPRX1	1076	ARCHS4 Coexpression,1327;Enrichr Queries,730;GTEx Coexpression,1171	PRDM1
gene_set_query	1384	HES5	1079	ARCHS4 Coexpression,889;Enrichr Queries,796;GTEx Coexpression,1551	PRDM1
gene_set_query	1385	ZNF467	1079	ARCHS4 Coexpression,895;Enrichr Queries,1221;GTEx Coexpression,1120
gene_set_query	1386	NEUROG3	1079	ARCHS4 Coexpression,462;Enrichr Queries,1335;GTEx Coexpression,1441	CXXC4
gene_set_query	1387	ZNF613	1080	ARCHS4 Coexpression,1519;Enrichr Queries,928;GTEx Coexpression,794	ZNF83
gene_set_query	1388	CCDC17	1081	ARCHS4 Coexpression,1028;GTEx Coexpression,1134
gene_set_query	1389	ZNF787	1081	ARCHS4 Coexpression,1083;Enrichr Queries,1277;GTEx Coexpression,883
gene_set_query	1390	RORB	1082	ARCHS4 Coexpression,1017;Enrichr Queries,808;GTEx Coexpression,1422	PRDM1
gene_set_query	1391	SCRT2	1083	ARCHS4 Coexpression,1230;Enrichr Queries,1160;GTEx Coexpression,858
gene_set_query	1392	TBR1	1083	ARCHS4 Coexpression,1334;Enrichr Queries,422;GTEx Coexpression,1493	RFX7,ASH1L
gene_set_query	1393	ZNF697	1083	ARCHS4 Coexpression,930;Enrichr Queries,764;GTEx Coexpression,1555	PRDM1
gene_set_query	1394	POU6F1	1083	ARCHS4 Coexpression,1584;Enrichr Queries,853;GTEx Coexpression,813	SETBP1
gene_set_query	1395	FEZF2	1084	ARCHS4 Coexpression,459;Enrichr Queries,1375;GTEx Coexpression,1418	BPTF
gene_set_query	1396	RHOXF2B	1084	ARCHS4 Coexpression,1059;Enrichr Queries,960;GTEx Coexpression,1233	TP63
gene_set_query	1397	NFE4	1085	GTEx Coexpression,1085
gene_set_query	1398	ZNF628	1086	ARCHS4 Coexpression,1074;Enrichr Queries,989;GTEx Coexpression,1196
gene_set_query	1399	SP100	1087	ARCHS4 Coexpression,1301;Enrichr Queries,1170;GTEx Coexpression,789
gene_set_query	1400	FBXL19	1088	ARCHS4 Coexpression,1178;GTEx Coexpression,997
gene_set_query	1401	IKZF3	1088	ARCHS4 Coexpression,1210;Enrichr Queries,644;GTEx Coexpression,1411	PRDM1
gene_set_query	1402	POU3F3	1091	ARCHS4 Coexpression,414;Enrichr Queries,1377;GTEx Coexpression,1481	TCF4
gene_set_query	1403	ZBTB48	1091	ARCHS4 Coexpression,998;Enrichr Queries,981;GTEx Coexpression,1294	SPEN
gene_set_query	1404	ZBED9	1092	ARCHS4 Coexpression,1060;GTEx Coexpression,1123
gene_set_query	1405	SP140	1093	ARCHS4 Coexpression,1392;Enrichr Queries,965;GTEx Coexpression,922	PRDM1
gene_set_query	1406	ZNF433	1093	ARCHS4 Coexpression,1462;Enrichr Queries,333;GTEx Coexpression,1484	ZNF83,ZBTB10
gene_set_query	1407	TET2	1093	ARCHS4 Coexpression,1305;GTEx Coexpression,881
gene_set_query	1408	ZBTB45	1093	ARCHS4 Coexpression,923;Enrichr Queries,1140;GTEx Coexpression,1217
gene_set_query	1409	LTF	1094	ARCHS4 Coexpression,987;GTEx Coexpression,1200
gene_set_query	1410	ZNF610	1095	ARCHS4 Coexpression,1411;Enrichr Queries,973;GTEx Coexpression,900	ZNF83
gene_set_query	1411	LHX2	1095	ARCHS4 Coexpression,1349;Enrichr Queries,1331;ReMap ChIP-seq,275;GTEx Coexpression,1424
gene_set_query	1412	NFIX	1097	ARCHS4 Coexpression,1458;Enrichr Queries,1205;GTEx Coexpression,627	ASH1L
gene_set_query	1413	ZFP41	1098	ARCHS4 Coexpression,1256;Enrichr Queries,1015;GTEx Coexpression,1022
gene_set_query	1414	ZSCAN5B	1098	ARCHS4 Coexpression,1361;Enrichr Queries,1020;GTEx Coexpression,914
gene_set_query	1415	MSC	1099	ARCHS4 Coexpression,994;Enrichr Queries,798;GTEx Coexpression,1505	PRDM1
gene_set_query	1416	NEUROG1	1099	ARCHS4 Coexpression,1445;Enrichr Queries,548;GTEx Coexpression,1305	MYOD1
gene_set_query	1417	TBX22	1099	ARCHS4 Coexpression,736;Enrichr Queries,1318;GTEx Coexpression,1244
gene_set_query	1418	OLIG2	1101	Literature ChIP-seq,34;ARCHS4 Coexpression,1497;Enrichr Queries,1370;GTEx Coexpression,1504	SPEN,RFX7,SMAD9,TCF20,CXXC4
gene_set_query	1419	ZNF222	1104	ARCHS4 Coexpression,1498;Enrichr Queries,748;GTEx Coexpression,1065	ZNF83
gene_set_query	1420	ZNF75D	1104	ARCHS4 Coexpression,1356;Enrichr Queries,582;GTEx Coexpression,1375	SETBP1
gene_set_query	1421	FAM200B	1105	ARCHS4 Coexpression,847;GTEx Coexpression,1362
gene_set_query	1422	ZNF735	1108	ARCHS4 Coexpression,1229;GTEx Coexpression,987
gene_set_query	1423	ZNF574	1108	ARCHS4 Coexpression,932;Enrichr Queries,1274;GTEx Coexpression,1119
gene_set_query	1424	IRX6	1109	ARCHS4 Coexpression,1466;Enrichr Queries,1361;GTEx Coexpression,500	TP63
gene_set_query	1425	ZNF497	1109	ARCHS4 Coexpression,699;Enrichr Queries,1346;GTEx Coexpression,1283
gene_set_query	1426	FOXR2	1110	ARCHS4 Coexpression,1397;Enrichr Queries,557;GTEx Coexpression,1376	PRDM1
gene_set_query	1427	NR5A1	1110	ARCHS4 Coexpression,1232;Enrichr Queries,631;GTEx Coexpression,1467	ESR1
gene_set_query	1428	EVX2	1111	ARCHS4 Coexpression,1227;Enrichr Queries,530;GTEx Coexpression,1576	MYOD1
gene_set_query	1429	HSF2	1112	ARCHS4 Coexpression,1394;Enrichr Queries,436;GTEx Coexpression,1506	ZBTB10,PRDM1
gene_set_query	1430	ZNF391	1112	ARCHS4 Coexpression,1358;Enrichr Queries,1267;GTEx Coexpression,712
gene_set_query	1431	ZBED1	1114	ARCHS4 Coexpression,1457;Enrichr Queries,1404;ReMap ChIP-seq,52;GTEx Coexpression,1543	ZNF584,SPEN
gene_set_query	1432	TFEC	1114	ARCHS4 Coexpression,1003;Enrichr Queries,932;GTEx Coexpression,1408	PRDM1
gene_set_query	1433	ZNF485	1115	ARCHS4 Coexpression,1444;Enrichr Queries,627;GTEx Coexpression,1273	PRDM1
gene_set_query	1434	GLIS1	1115	ARCHS4 Coexpression,1590;Enrichr Queries,276;GTEx Coexpression,1480	PRDM1,ESR1
gene_set_query	1435	SPZ1	1116	ARCHS4 Coexpression,796;GTEx Coexpression,1435
gene_set_query	1436	NANOGNB	1116	ARCHS4 Coexpression,916;GTEx Coexpression,1315
gene_set_query	1437	MXD4	1116	ARCHS4 Coexpression,1505;Enrichr Queries,1135;GTEx Coexpression,707
gene_set_query	1438	MEOX2	1116	ARCHS4 Coexpression,1600;Enrichr Queries,1312;GTEx Coexpression,435	TCF4
gene_set_query	1439	ZNF215	1116	ARCHS4 Coexpression,1322;Enrichr Queries,891;GTEx Coexpression,1135	PRDM1
gene_set_query	1440	ZNF414	1117	ARCHS4 Coexpression,749;Enrichr Queries,1156;GTEx Coexpression,1446
gene_set_query	1441	BHLHE41	1119	ARCHS4 Coexpression,1023;GTEx Coexpression,1215
gene_set_query	1442	SOX10	1121	ARCHS4 Coexpression,1573;Enrichr Queries,1197;ReMap ChIP-seq,260;GTEx Coexpression,1453
gene_set_query	1443	NKX23	1121	ARCHS4 Coexpression,1524;GTEx Coexpression,718
gene_set_query	1444	ZUP1	1122	ARCHS4 Coexpression,1537;Enrichr Queries,975;GTEx Coexpression,853	ZBTB10
gene_set_query	1445	LHX8	1123	ARCHS4 Coexpression,1217;Enrichr Queries,635;GTEx Coexpression,1516	PRDM1
gene_set_query	1446	ZFP28	1123	ARCHS4 Coexpression,1108;Enrichr Queries,1166;GTEx Coexpression,1094
gene_set_query	1447	PPARA	1123	ARCHS4 Coexpression,1330;Enrichr Queries,722;GTEx Coexpression,1317	ESR1
gene_set_query	1448	SNAPC2	1123	ARCHS4 Coexpression,908;GTEx Coexpression,1338
gene_set_query	1449	CAMTA2	1123	ARCHS4 Coexpression,1517;Enrichr Queries,1009;GTEx Coexpression,843
gene_set_query	1450	ZNF563	1125	ARCHS4 Coexpression,1032;Enrichr Queries,742;GTEx Coexpression,1601	ZNF83
gene_set_query	1451	HMGA1	1125	ARCHS4 Coexpression,1116;Enrichr Queries,1127;GTEx Coexpression,1133
gene_set_query	1452	BARHL2	1126	ARCHS4 Coexpression,1234;Enrichr Queries,1395;GTEx Coexpression,750
gene_set_query	1453	IRX1	1128	ARCHS4 Coexpression,1000;Enrichr Queries,1187;GTEx Coexpression,1197
gene_set_query	1454	DMRTA1	1129	ARCHS4 Coexpression,1289;Enrichr Queries,790;GTEx Coexpression,1307	PRDM1
gene_set_query	1455	TCF15	1129	ARCHS4 Coexpression,963;Enrichr Queries,861;GTEx Coexpression,1562	PRDM1
gene_set_query	1456	SOX1	1129	ARCHS4 Coexpression,601;Enrichr Queries,1396;GTEx Coexpression,1389	TCF4
gene_set_query	1457	ZNF394	1130	ARCHS4 Coexpression,1319;Enrichr Queries,1014;GTEx Coexpression,1058
gene_set_query	1458	TLX3	1131	ARCHS4 Coexpression,834;Enrichr Queries,1393;GTEx Coexpression,1165
gene_set_query	1459	ZNF560	1131	ARCHS4 Coexpression,1370;Enrichr Queries,1080;GTEx Coexpression,942
gene_set_query	1460	ZFPM1	1131	ARCHS4 Coexpression,1324;Enrichr Queries,1074;GTEx Coexpression,994
gene_set_query	1461	NR1D1	1131	ARCHS4 Coexpression,1529;Enrichr Queries,1227;GTEx Coexpression,637	TP63
gene_set_query	1462	ZBTB22	1131	ARCHS4 Coexpression,1314;Enrichr Queries,1142;GTEx Coexpression,938
gene_set_query	1463	CPXCR1	1132	ARCHS4 Coexpression,828;Enrichr Queries,1004;GTEx Coexpression,1563
gene_set_query	1464	ZNF444	1133	ARCHS4 Coexpression,1499;Enrichr Queries,1238;GTEx Coexpression,662	CXXC4
gene_set_query	1465	ZNF668	1133	ARCHS4 Coexpression,833;Enrichr Queries,1025;GTEx Coexpression,1542
gene_set_query	1466	ZNF679	1135	ARCHS4 Coexpression,1294;Enrichr Queries,598;GTEx Coexpression,1512	ZNF83
gene_set_query	1467	GSX2	1135	ARCHS4 Coexpression,1336;Enrichr Queries,532;GTEx Coexpression,1537	PRDM1
gene_set_query	1468	DRAP1	1137	ARCHS4 Coexpression,863;Enrichr Queries,1286;GTEx Coexpression,1261
gene_set_query	1469	ZNF98	1138	ARCHS4 Coexpression,1383;Enrichr Queries,1042;GTEx Coexpression,988
gene_set_query	1470	TFAP2E	1138	ARCHS4 Coexpression,1555;Enrichr Queries,1051;GTEx Coexpression,808
gene_set_query	1471	TBX10	1140	ARCHS4 Coexpression,933;Enrichr Queries,1228;GTEx Coexpression,1259
gene_set_query	1472	FOXN4	1140	ARCHS4 Coexpression,1047;Enrichr Queries,1143;GTEx Coexpression,1230
gene_set_query	1473	ZNF655	1140	ARCHS4 Coexpression,1395;Enrichr Queries,703;GTEx Coexpression,1323	PRDM1
gene_set_query	1474	ZNF836	1141	ARCHS4 Coexpression,1162;Enrichr Queries,766;GTEx Coexpression,1496	ZNF83
gene_set_query	1475	THRB	1141	ARCHS4 Coexpression,1423;Enrichr Queries,608;GTEx Coexpression,1393	ESR1
gene_set_query	1476	MLXIPL	1144	ARCHS4 Coexpression,1165;Enrichr Queries,1283;GTEx Coexpression,984
gene_set_query	1477	ZNF705B	1146	ARCHS4 Coexpression,762;GTEx Coexpression,1529
gene_set_query	1478	ZNF385B	1146	ARCHS4 Coexpression,1126;Enrichr Queries,881;GTEx Coexpression,1430	ESR1
gene_set_query	1479	ZNF57	1147	ARCHS4 Coexpression,1453;Enrichr Queries,1386;GTEx Coexpression,602	TP63
gene_set_query	1480	CCDC169SOHLH2	1148	ARCHS4 Coexpression,1148
gene_set_query	1481	REXO4	1149	ARCHS4 Coexpression,809;GTEx Coexpression,1488
gene_set_query	1482	ZNF653	1149	ARCHS4 Coexpression,1339;Enrichr Queries,1154;GTEx Coexpression,953
gene_set_query	1483	ZNF511	1150	ARCHS4 Coexpression,1112;Enrichr Queries,1365;GTEx Coexpression,972
gene_set_query	1484	RFX8	1157	ARCHS4 Coexpression,782;GTEx Coexpression,1531
gene_set_query	1485	FOXL1	1159	ARCHS4 Coexpression,1543;Enrichr Queries,447;GTEx Coexpression,1487	PRDM1,ESR1
gene_set_query	1486	SOHLH2	1161	ARCHS4 Coexpression,1185;Enrichr Queries,814;GTEx Coexpression,1483	PRDM1
gene_set_query	1487	ZNF684	1161	ARCHS4 Coexpression,1274;Enrichr Queries,855;GTEx Coexpression,1355	ZZZ3
gene_set_query	1488	THAP2	1162	ARCHS4 Coexpression,1534;Enrichr Queries,771;GTEx Coexpression,1180	ZBTB10
gene_set_query	1489	ARID3B	1163	ARCHS4 Coexpression,941;GTEx Coexpression,1384
gene_set_query	1490	ESX1	1163	ARCHS4 Coexpression,1627;Enrichr Queries,569;GTEx Coexpression,1292	PRDM1
gene_set_query	1491	SP7	1163	ARCHS4 Coexpression,1552;Enrichr Queries,689;GTEx Coexpression,1249	PRDM1
gene_set_query	1492	LEUTX	1165	ARCHS4 Coexpression,1419;Enrichr Queries,733;GTEx Coexpression,1343	PRDM1
gene_set_query	1493	PRDM8	1166	ARCHS4 Coexpression,1209;Enrichr Queries,688;GTEx Coexpression,1602	PRDM1
gene_set_query	1494	GBX1	1168	ARCHS4 Coexpression,885;Enrichr Queries,1394;GTEx Coexpression,1226
gene_set_query	1495	ZNF408	1169	ARCHS4 Coexpression,922;Enrichr Queries,1179;GTEx Coexpression,1405
gene_set_query	1496	BATF2	1170	ARCHS4 Coexpression,780;Enrichr Queries,1352;GTEx Coexpression,1379
gene_set_query	1497	ZNF32	1173	ARCHS4 Coexpression,634;Enrichr Queries,1338;GTEx Coexpression,1547	TCF20
gene_set_query	1498	SP110	1173	ARCHS4 Coexpression,1316;Enrichr Queries,1378;GTEx Coexpression,826
gene_set_query	1499	ZNF276	1175	ARCHS4 Coexpression,1338;Enrichr Queries,997;GTEx Coexpression,1190
gene_set_query	1500	HIC1	1176	ARCHS4 Coexpression,1325;Enrichr Queries,695;GTEx Coexpression,1507	PRDM1
gene_set_query	1501	FOXO6	1176	ARCHS4 Coexpression,1111;Enrichr Queries,1171;GTEx Coexpression,1247
gene_set_query	1502	FOXD4L1	1179	ARCHS4 Coexpression,1235;Enrichr Queries,1350;GTEx Coexpression,951
gene_set_query	1503	ZNF586	1185	ARCHS4 Coexpression,1535;Enrichr Queries,917;GTEx Coexpression,1102	SPEN
gene_set_query	1504	NPAS2	1186	ARCHS4 Coexpression,1145;Enrichr Queries,1316;GTEx Coexpression,1098
gene_set_query	1505	ZBTB14	1190	ARCHS4 Coexpression,1604;GTEx Coexpression,775
gene_set_query	1506	OVOL3	1193	ARCHS4 Coexpression,1257;GTEx Coexpression,1129
gene_set_query	1507	ZNF705D	1194	ARCHS4 Coexpression,1337;Enrichr Queries,831;GTEx Coexpression,1413	TP63
gene_set_query	1508	FOXD3	1197	ARCHS4 Coexpression,838;Enrichr Queries,1380;GTEx Coexpression,1374
gene_set_query	1509	POU2AF1	1199	ARCHS4 Coexpression,1390;GTEx Coexpression,1007
gene_set_query	1510	PRMT3	1199	ARCHS4 Coexpression,1249;Enrichr Queries,1076;GTEx Coexpression,1272
gene_set_query	1511	ZIK1	1202	ARCHS4 Coexpression,1514;Enrichr Queries,1259;GTEx Coexpression,832
gene_set_query	1512	ZNF473	1205	ARCHS4 Coexpression,1055;Enrichr Queries,1308;GTEx Coexpression,1251
gene_set_query	1513	HOMEZ	1205	ARCHS4 Coexpression,1100;Enrichr Queries,1054;GTEx Coexpression,1462
gene_set_query	1514	INSM1	1205	ARCHS4 Coexpression,1135;Enrichr Queries,1120;GTEx Coexpression,1361
gene_set_query	1515	ZBTB17	1205	ARCHS4 Coexpression,1159;Enrichr Queries,980;GTEx Coexpression,1477	SPEN
gene_set_query	1516	ZBTB20	1206	ARCHS4 Coexpression,1366;Enrichr Queries,676;GTEx Coexpression,1577	SETBP1
gene_set_query	1517	HMGA2	1210	ARCHS4 Coexpression,1357;Enrichr Queries,769;GTEx Coexpression,1503	PRDM1
gene_set_query	1518	CDC5L	1211	ARCHS4 Coexpression,1587;Enrichr Queries,1109;GTEx Coexpression,936
gene_set_query	1519	EBF2	1212	ARCHS4 Coexpression,1082;GTEx Coexpression,1341
gene_set_query	1520	MBNL2	1213	ARCHS4 Coexpression,921;Enrichr Queries,1248;GTEx Coexpression,1470
gene_set_query	1521	ZNF672	1213	ARCHS4 Coexpression,1007;Enrichr Queries,1182;GTEx Coexpression,1451
gene_set_query	1522	ZNF223	1214	ARCHS4 Coexpression,1525;Enrichr Queries,1300;GTEx Coexpression,816
gene_set_query	1523	ZNF285	1215	ARCHS4 Coexpression,1581;GTEx Coexpression,849
gene_set_query	1524	RAX2	1219	ARCHS4 Coexpression,1150;Enrichr Queries,1329;GTEx Coexpression,1177
gene_set_query	1525	YBX2	1223	ARCHS4 Coexpression,1269;Enrichr Queries,1161;GTEx Coexpression,1240
gene_set_query	1526	DPF1	1225	ARCHS4 Coexpression,1429;Enrichr Queries,1301;GTEx Coexpression,945
gene_set_query	1527	TEF	1228	ARCHS4 Coexpression,1492;Enrichr Queries,1272;GTEx Coexpression,920
gene_set_query	1528	ZNF730	1231	ARCHS4 Coexpression,1585;GTEx Coexpression,876
gene_set_query	1529	TTF1	1231	ARCHS4 Coexpression,1376;GTEx Coexpression,1086
gene_set_query	1530	TBPL2	1233	ARCHS4 Coexpression,1580;GTEx Coexpression,886
gene_set_query	1531	FOXP4	1234	ARCHS4 Coexpression,1412;Enrichr Queries,822;GTEx Coexpression,1468	PRDM1
gene_set_query	1532	HLF	1234	ARCHS4 Coexpression,1303;Enrichr Queries,1206;GTEx Coexpression,1194
gene_set_query	1533	AKAP8L	1237	ARCHS4 Coexpression,1350;Enrichr Queries,921;GTEx Coexpression,1439	SPEN
gene_set_query	1534	ZNF354A	1241	ARCHS4 Coexpression,1480;Enrichr Queries,1315;GTEx Coexpression,927
gene_set_query	1535	NEUROD4	1241	ARCHS4 Coexpression,1591;Enrichr Queries,806;GTEx Coexpression,1327	PRDM1
gene_set_query	1536	SCX	1242	ARCHS4 Coexpression,1242
gene_set_query	1537	FAM170A	1246	ARCHS4 Coexpression,1455;Enrichr Queries,816;GTEx Coexpression,1466	ESR1
gene_set_query	1538	ZNF837	1249	ARCHS4 Coexpression,1015;Enrichr Queries,1399;GTEx Coexpression,1333
gene_set_query	1539	CXXC5	1250	ARCHS4 Coexpression,1465;GTEx Coexpression,1035
gene_set_query	1540	TBPL1	1253	ARCHS4 Coexpression,1031;GTEx Coexpression,1474
gene_set_query	1541	THAP4	1253	ARCHS4 Coexpression,1137;Enrichr Queries,1102;GTEx Coexpression,1521
gene_set_query	1542	ZNF701	1255	ARCHS4 Coexpression,1622;Enrichr Queries,901;GTEx Coexpression,1243	ZNF83
gene_set_query	1543	ZNF512B	1259	ARCHS4 Coexpression,1250;Enrichr Queries,995;GTEx Coexpression,1533
gene_set_query	1544	DUXA	1260	ARCHS4 Coexpression,1391;Enrichr Queries,786;GTEx Coexpression,1604	PRDM1
gene_set_query	1545	ZNF705G	1261	ARCHS4 Coexpression,983;GTEx Coexpression,1539
gene_set_query	1546	REPIN1	1264	ARCHS4 Coexpression,1288;Enrichr Queries,1302;GTEx Coexpression,1201
gene_set_query	1547	ZNF280B	1264	ARCHS4 Coexpression,1461;Enrichr Queries,1067
gene_set_query	1548	FOXE3	1264	ARCHS4 Coexpression,999;Enrichr Queries,1403;GTEx Coexpression,1391
gene_set_query	1549	SCRT1	1268	ARCHS4 Coexpression,1542;Enrichr Queries,993
gene_set_query	1550	ZNF281	1270	ARCHS4 Coexpression,1452;Enrichr Queries,1294;GTEx Coexpression,1064
gene_set_query	1551	SP140L	1271	ARCHS4 Coexpression,1146;GTEx Coexpression,1396
gene_set_query	1552	ZNF775	1273	ARCHS4 Coexpression,1216;Enrichr Queries,1257;GTEx Coexpression,1346
gene_set_query	1553	ARNT2	1279	ARCHS4 Coexpression,1500;Enrichr Queries,1190;GTEx Coexpression,1148
gene_set_query	1554	TSC22D1	1285	ARCHS4 Coexpression,1340;Enrichr Queries,1279;GTEx Coexpression,1236
gene_set_query	1555	MTERF3	1288	ARCHS4 Coexpression,1436;GTEx Coexpression,1140
gene_set_query	1556	SGSM2	1291	ARCHS4 Coexpression,1507;GTEx Coexpression,1074
gene_set_query	1557	ZNF280A	1292	ARCHS4 Coexpression,1191;Enrichr Queries,1207;GTEx Coexpression,1478
gene_set_query	1558	NPAS1	1292	ARCHS4 Coexpression,1259;Enrichr Queries,1189;GTEx Coexpression,1429
gene_set_query	1559	PHF1	1296	ARCHS4 Coexpression,1244;GTEx Coexpression,1347
gene_set_query	1560	ZBTB18	1297	ARCHS4 Coexpression,1566;GTEx Coexpression,1027
gene_set_query	1561	MSANTD4	1299	ARCHS4 Coexpression,1012;GTEx Coexpression,1586
gene_set_query	1562	FOSB	1301	ARCHS4 Coexpression,1384;Enrichr Queries,1150;GTEx Coexpression,1370
gene_set_query	1563	ZNF705A	1302	ARCHS4 Coexpression,1080;Enrichr Queries,1389;GTEx Coexpression,1436
gene_set_query	1564	ZNF23	1303	ARCHS4 Coexpression,1438;Enrichr Queries,1306;GTEx Coexpression,1166
gene_set_query	1565	CREBL2	1303	ARCHS4 Coexpression,1470;Enrichr Queries,886;GTEx Coexpression,1554	PRDM1
gene_set_query	1566	ZNF524	1308	ARCHS4 Coexpression,1226;Enrichr Queries,1390;GTEx Coexpression,1308
gene_set_query	1567	SLC2A4RG	1308	ARCHS4 Coexpression,1246;Enrichr Queries,1383;GTEx Coexpression,1295
gene_set_query	1568	ZNF85	1311	ARCHS4 Coexpression,1577;Enrichr Queries,979;GTEx Coexpression,1378	ZNF83
gene_set_query	1569	ZNF695	1312	ARCHS4 Coexpression,1494;Enrichr Queries,1325;GTEx Coexpression,1118
gene_set_query	1570	ZNF395	1318	ARCHS4 Coexpression,1293;Enrichr Queries,1162;GTEx Coexpression,1498
gene_set_query	1571	ZNF768	1326	ARCHS4 Coexpression,1072;Enrichr Queries,1363;GTEx Coexpression,1544
gene_set_query	1572	FIZ1	1329	ARCHS4 Coexpression,1396;Enrichr Queries,1007;GTEx Coexpression,1584
gene_set_query	1573	ZNF367	1329	ARCHS4 Coexpression,1594;Enrichr Queries,1328;GTEx Coexpression,1066
gene_set_query	1574	BARHL1	1330	ARCHS4 Coexpression,1570;Enrichr Queries,1359;GTEx Coexpression,1061
gene_set_query	1575	ZBTB47	1333	ARCHS4 Coexpression,1211;Enrichr Queries,1240;GTEx Coexpression,1548
gene_set_query	1576	ZNF852	1335	ARCHS4 Coexpression,1608;GTEx Coexpression,1062
gene_set_query	1577	HES6	1335	ARCHS4 Coexpression,1298;Enrichr Queries,1340;GTEx Coexpression,1368
gene_set_query	1578	MESP1	1336	ARCHS4 Coexpression,1428;Enrichr Queries,1314;GTEx Coexpression,1266
gene_set_query	1579	SOHLH1	1338	ARCHS4 Coexpression,1432;Enrichr Queries,1046;GTEx Coexpression,1536
gene_set_query	1580	ZGLP1	1344	ARCHS4 Coexpression,1560;GTEx Coexpression,1128
gene_set_query	1581	BARX1	1349	ARCHS4 Coexpression,1201;Enrichr Queries,1400;GTEx Coexpression,1445
gene_set_query	1582	TCFL5	1353	ARCHS4 Coexpression,1620;Enrichr Queries,1295;GTEx Coexpression,1144
gene_set_query	1583	NKX63	1353	ARCHS4 Coexpression,1618;GTEx Coexpression,1088
gene_set_query	1584	FEV	1356	ARCHS4 Coexpression,1166;Enrichr Queries,1360;GTEx Coexpression,1541
gene_set_query	1585	CXXC1	1359	ARCHS4 Coexpression,1430;Enrichr Queries,1078;GTEx Coexpression,1568
gene_set_query	1586	C11ORF95	1359	GTEx Coexpression,1359
gene_set_query	1587	SIX3	1360	ARCHS4 Coexpression,1474;Enrichr Queries,1373;GTEx Coexpression,1234
gene_set_query	1588	NKX11	1361	ARCHS4 Coexpression,1378;GTEx Coexpression,1344
gene_set_query	1589	EMX1	1362	ARCHS4 Coexpression,1315;Enrichr Queries,1313;GTEx Coexpression,1458
gene_set_query	1590	ATF6B	1362	ARCHS4 Coexpression,1443;GTEx Coexpression,1281
gene_set_query	1591	ZSCAN32	1364	ARCHS4 Coexpression,1451;GTEx Coexpression,1277
gene_set_query	1592	ZNF569	1365	ARCHS4 Coexpression,1491;Enrichr Queries,1208;GTEx Coexpression,1397
gene_set_query	1593	ZSCAN16	1368	ARCHS4 Coexpression,1567;Enrichr Queries,1369;GTEx Coexpression,1169
gene_set_query	1594	ZNF277	1369	ARCHS4 Coexpression,1521;Enrichr Queries,1173;GTEx Coexpression,1412
gene_set_query	1595	ANKZF1	1369	ARCHS4 Coexpression,1503;Enrichr Queries,1016;GTEx Coexpression,1589
gene_set_query	1596	FOXO4	1370	ARCHS4 Coexpression,1373;Enrichr Queries,1289;GTEx Coexpression,1449
gene_set_query	1597	MBD6	1371	ARCHS4 Coexpression,1308;GTEx Coexpression,1433
gene_set_query	1598	ZNF428	1374	ARCHS4 Coexpression,1473;Enrichr Queries,1198;GTEx Coexpression,1452
gene_set_query	1599	CENPT	1388	ARCHS4 Coexpression,1369;Enrichr Queries,1334;GTEx Coexpression,1460
gene_set_query	1600	RBCK1	1391	ARCHS4 Coexpression,1188;GTEx Coexpression,1593
gene_set_query	1601	MEIS3	1396	ARCHS4 Coexpression,1597;Enrichr Queries,1165;GTEx Coexpression,1426
gene_set_query	1602	MYRF	1402	ARCHS4 Coexpression,1364;GTEx Coexpression,1440
gene_set_query	1603	GATA5	1405	ARCHS4 Coexpression,1271;Enrichr Queries,1358;GTEx Coexpression,1585
gene_set_query	1604	DBX2	1408	ARCHS4 Coexpression,1606;Enrichr Queries,1117;GTEx Coexpression,1500
gene_set_query	1605	ZNF479	1415	ARCHS4 Coexpression,1484;Enrichr Queries,1202;GTEx Coexpression,1559
gene_set_query	1606	BHLHA9	1423	ARCHS4 Coexpression,1386;GTEx Coexpression,1459
gene_set_query	1607	MTERF1	1435	ARCHS4 Coexpression,1613;GTEx Coexpression,1257
gene_set_query	1608	KCNIP3	1438	ARCHS4 Coexpression,1459;GTEx Coexpression,1417
gene_set_query	1609	TBX18	1438	ARCHS4 Coexpression,1522;Enrichr Queries,1336;GTEx Coexpression,1457
gene_set_query	1610	HOXD8	1444	ARCHS4 Coexpression,1513;Enrichr Queries,1317;GTEx Coexpression,1502
gene_set_query	1611	FOXC2	1449	ARCHS4 Coexpression,1489;Enrichr Queries,1270;GTEx Coexpression,1588
gene_set_query	1612	NKX26	1452	ARCHS4 Coexpression,1549;GTEx Coexpression,1354
gene_set_query	1613	ZNF816	1455	ARCHS4 Coexpression,1609;GTEx Coexpression,1301
gene_set_query	1614	OSR1	1460	ARCHS4 Coexpression,1598;GTEx Coexpression,1322
gene_set_query	1615	SOX8	1461	ARCHS4 Coexpression,1605;Enrichr Queries,1180;GTEx Coexpression,1597
gene_set_query	1616	HMX1	1461	ARCHS4 Coexpression,1400;Enrichr Queries,1401;GTEx Coexpression,1583
gene_set_query	1617	CENPB	1472	ARCHS4 Coexpression,1533;Enrichr Queries,1322;GTEx Coexpression,1561
gene_set_query	1618	ZNF488	1480	ARCHS4 Coexpression,1579;Enrichr Queries,1381
gene_set_query	1619	OLIG1	1482	ARCHS4 Coexpression,1625;Enrichr Queries,1345;GTEx Coexpression,1476
gene_set_query	1620	MSANTD1	1483	ARCHS4 Coexpression,1621;GTEx Coexpression,1345
gene_set_query	1621	AEBP1	1487	ARCHS4 Coexpression,1441;GTEx Coexpression,1532
gene_set_query	1622	PRRX2	1489	ARCHS4 Coexpression,1589;Enrichr Queries,1278;GTEx Coexpression,1599
gene_set_query	1623	FOXS1	1502	ARCHS4 Coexpression,1575;Enrichr Queries,1374;GTEx Coexpression,1557
gene_set_query	1624	ZNF853	1511	ARCHS4 Coexpression,1469;GTEx Coexpression,1553
gene_set_query	1625	NKX25	1526	ARCHS4 Coexpression,1596;GTEx Coexpression,1456
gene_set_query	1626	NKX62	1532	ARCHS4 Coexpression,1588;GTEx Coexpression,1475
gene_set_query	1627	TWIST2	1546	ARCHS4 Coexpression,1496;GTEx Coexpression,1596
gene_set_query	1628	MSANTD3	1551	ARCHS4 Coexpression,1582;GTEx Coexpression,1519
gene_set_query	1629	MYPOP	1560	ARCHS4 Coexpression,1569;GTEx Coexpression,1550
gene_set_query	1630	NACC2	1561	ARCHS4 Coexpression,1556;GTEx Coexpression,1565
gene_set_query	1631	ZNF469	1566	ARCHS4 Coexpression,1563;GTEx Coexpression,1569
gene_set_query	1632	CC2D1A	1567	ARCHS4 Coexpression,1546;GTEx Coexpression,1587
